# Supplementary material for: Near-surface Palaeocene fluid flow, mineralisation and faulting at Flamborough Head, UK: new field observations and U–Pb calcite dating constraints
Source: Copernicus journal article supplement (doi:10.5194/se-11-1931-2020), 2020-10-28

Supplementary Information for:

# **Near-surface Palaeocene fluid flow, mineralisation and faulting at Flamborough Head, UK: new field observations and U-Pb calcite dating constraints**

Nick M W Roberts<sup>1</sup>, Jack K Lee<sup>1, 2</sup>, Robert E Holdsworth<sup>2</sup>, Christopher Jeans<sup>3</sup>, Andrew R Farrant<sup>4</sup>

<sup>1</sup>Geochronology & Tracers Facility, British Geological Survey, Environmental Science Centre, Nottingham, NG12 5GG, UK

<sup>2</sup>Department of Earth Sciences, Durham University, Science Labs, Durham, UK

<sup>3</sup>Department of Earth Sciences, University of Cambridge, Downing Place, Cambridge, UK

<sup>4</sup>British Geological Survey, Environmental Science Centre, Nottingham, UK

## **Methodology**

### **Imaging**

Back-scattered electron (BSE) and charge-contrast (CCI) images were taken at the British Geological Survey (BGS, Nottingham, UK), using a FEI QUANTA 600 environmental scanning electron microscope (ESEM). Samples were prepared as resin-impregnated polished sections and imaged as uncoated samples under low-vacuum conditions (130 Pa) with a working distance of 10 mm. BSE images were recorded using a solid-state (dual-diode) electron detector, with a 20 kV electron beam accelerating voltage, and beam currents between 0.1 and 0.6 nA. CCI images were recorded using a FEI large-field gaseous secondary electron (electron cascade) detector, with 20 kV electron beam accelerating voltage, and beam currents of 1.2 to 4.5 nA.

Cathodoluminescence imaging was undertaken at the BGS using a Technosyn 8200 MkII cold-cathode luminescope stage attached to a Nikon optical microscope with long working distance lenses, and equipped with a Zeiss AxioCam MRc5 digital camera; vacuum and electron beam voltage and current were adjusted as required to generate optimum luminescence.

### **U-Pb**

LA-ICP-MS calcite U-Pb dating results are tabulated in the supplementary table. U-Pb geochronology was conducted at the Geochronology and Tracers Facility, British Geological Survey, UK, using the method described in Roberts and Walker (2016) and Roberts et al. (2017). Instrumentation used was a Nu Instruments Attom single collector ICP-MS, coupled to a NWR193UC laser ablation system fitted with a TV2 cell. Ablation conditions were a 100 µm spot, ablated for 30 seconds, using a fluence of 6 J/cm<sup>2</sup> with a repetition rate of 10 Hz. A gas blank of 60 seconds was subtracted at the beginning of each run, and a washout of 5 seconds was allowed between each ablation. Standard sample bracketing was employed, using NIST614 glass (values of

Woodhead and Hergt, 2001) for normalisation of Pb-Pb ratios, and WC1 (254 Ma; Roberts et al., 2017) for normalisation of Pb-U ratios. ASH15D was run as a secondary reference material ( $2.964 \pm 0.009$  Ma; Perach Nuriel personal communication, 2020) during two sessions, and provided ages of  $2.81 \pm 0.10$  and  $2.93 \pm 0.12$  Ma. DuffBrown Tank ( $64.04 \pm 0.67$  Ma; Hill et al., 2016) was run as another secondary reference material during two sessions, and provided ages of  $64.6 \pm 1.0$  and  $66.7 \pm 1.7$  Ma. Data are reduced using the time-resolved-analysis function in the Nu Attolab software, and an in-house excel spreadsheet. Uncertainty propagation is based on the fundamentals of Horstwood et al. (2016), and age uncertainties are quoted as  $\pm \alpha/\beta$ , where  $\alpha$  is without systematic uncertainties, and  $\beta$  is with systematic uncertainties. No common lead correction is made; ages are determined from lower intercepts on a Tera-Wasserburg plot. All regressions are unanchored as the spread in data permits assessment of the upper intercept accurately.

| Laboratory & Sample Preparation             |                                                                                      |
|---------------------------------------------|--------------------------------------------------------------------------------------|
| Laboratory name                             | Geochronology & Tracers Facility, NERC Isotope Geosciences Laboratory                |
| Sample type/mineral                         | Calcite                                                                              |
| Sample preparation                          | Polished thin sections                                                               |
| Imaging                                     | Optical along with some minor CL and CCI.                                            |
| Laser ablation system                       |                                                                                      |
| Make, Model & type                          | ESI/New Wave Research, UP193UC                                                       |
| Ablation cell & volume                      | NWR TV2                                                                              |
| Laser wavelength (nm)                       | 193 nm                                                                               |
| Pulse width (ns)                            | 4 ns                                                                                 |
| Fluence ( $\text{J} \cdot \text{cm}^{-2}$ ) | $\sim 6 \text{ J} \cdot \text{cm}^{-2}$                                              |
| Repetition rate (Hz)                        | 10 Hz                                                                                |
| Spot size (m)                               | 100 $\mu\text{m}$                                                                    |
| Sampling mode/ pattern                      | Static spot                                                                          |
| Carrier gas                                 | 100% He, Ar make-up gas from DSN-100 combined using a Y-piece 50% along sample line. |
| Ablation duration (secs)                    | 30 secs                                                                              |
| Cell carrier gas flow (l/min)               | 0.7 l/min                                                                            |
| ICP-MS Instrument                           |                                                                                      |
| Make, Model & type                          | Nu Instruments, Attom, SC-ICP-MS                                                     |
| Sample introduction                         | Ablation aerosol                                                                     |
| RF power (W)                                | 1300 W                                                                               |
| Make-up gas flow                            | 0.7 l/min Ar                                                                         |
| Detection system                            | Single Mascom SEM                                                                    |
| Masses measured                             | 202, 204, 206, 207, 208, 232, 238                                                    |

|                                                    |                                                                                                                                                                                                                         |
|----------------------------------------------------|-------------------------------------------------------------------------------------------------------------------------------------------------------------------------------------------------------------------------|
| Integration time per peak (ms)                     | Dwell times of 200 $\mu$ s to 1000 $\mu$ s per peak                                                                                                                                                                     |
| Total integration time per reading (secs)          | 0.35 sec                                                                                                                                                                                                                |
| Sensitivity/ Efficiency (% , element)              | ~0.2% U                                                                                                                                                                                                                 |
| IC Dead time (ns)                                  | 11 ns                                                                                                                                                                                                                   |
| <b>Data Processing</b>                             |                                                                                                                                                                                                                         |
| Gas blank                                          | 30 second on-peak zero subtracted                                                                                                                                                                                       |
| Calibration strategy                               | NIST614 for Pb-Pb ratios, WC-1 for $^{206}\text{Pb}/^{238}\text{U}$ ratio                                                                                                                                               |
| Reference Material info                            | NIST614 (Woodhead and Hergt, 2001)<br>WC1 (Roberts et al., 2017)<br>ASH15D (Perach Nuriel pers. Comm. 2020)<br>DuffBrown Tank (Hill et al., 2016)                                                                       |
| Data processing package used / Correction for LIEF | In-house spreadsheet data processing after initial signal integration using Nu Instruments TRA software. No LIEF correction (mean of uncorrected ratios used)                                                           |
| Mass discrimination                                | Standard sample bracketing                                                                                                                                                                                              |
| Common-Pb correction, composition and uncertainty  | None applied. Ages calculated from regressions used in Tera-Wasserburg plots.                                                                                                                                           |
| Uncertainty level & propagation                    | Ages are quoted at $2\sigma$ absolute, propagation is by quadratic addition. Excess variance of reference material propagated into sample data. Systematic uncertainties include age uncertainty of reference material. |
| <b>Other information</b>                           |                                                                                                                                                                                                                         |

## References

- Hill, C.A., Polyak, V.J., Asmerom, Y. and P. Provencio, P., 2016. Constraints on a Late Cretaceous uplift, denudation, and incision of the Grand Canyon region, southwestern Colorado Plateau, USA, from U-Pb dating of lacustrine limestone. *Tectonics*, 35(4), pp.896-906.
- Horstwood, M.S., Košler, J., Gehrels, G., Jackson, S.E., McLean, N.M., Paton, C., Pearson, N.J., Sircombe, K., Sylvester, P., Vermeesch, P. and Bowring, J.F., 2016. Community-derived standards for LA-ICP-MS U-(Th-) Pb geochronology–Uncertainty propagation, age interpretation and data reporting. *Geostandards and Geoanalytical Research*, 40(3), pp.311-332.
- Roberts, N.M., Rasbury, E.T., Parrish, R.R., Smith, C.J., Horstwood, M.S. and Condon, D.J., 2017. A calcite reference material for LA-ICP-MS U-Pb geochronology. *Geochemistry, Geophysics, Geosystems*, 18(7), pp.2807-2814.
- Roberts, N.M. and Walker, R.J., 2016. U-Pb geochronology of calcite-mineralized faults: Absolute timing of rift-related fault events on the northeast Atlantic margin. *Geology*, 44(7), pp.531-534.

## Samples

**NR1707** - Vein cement from hydraulic breccia, hosted within the brecciated zone between Frontal Fault North and Frontal Fault South. Located on the foreshore.

**NR1708** - Vein cement from hydraulic breccia that is hosted within a rounded pebble of chalk, hosted within the brecciated zone between Frontal Fault North and Frontal Fault South. Located on the foreshore.

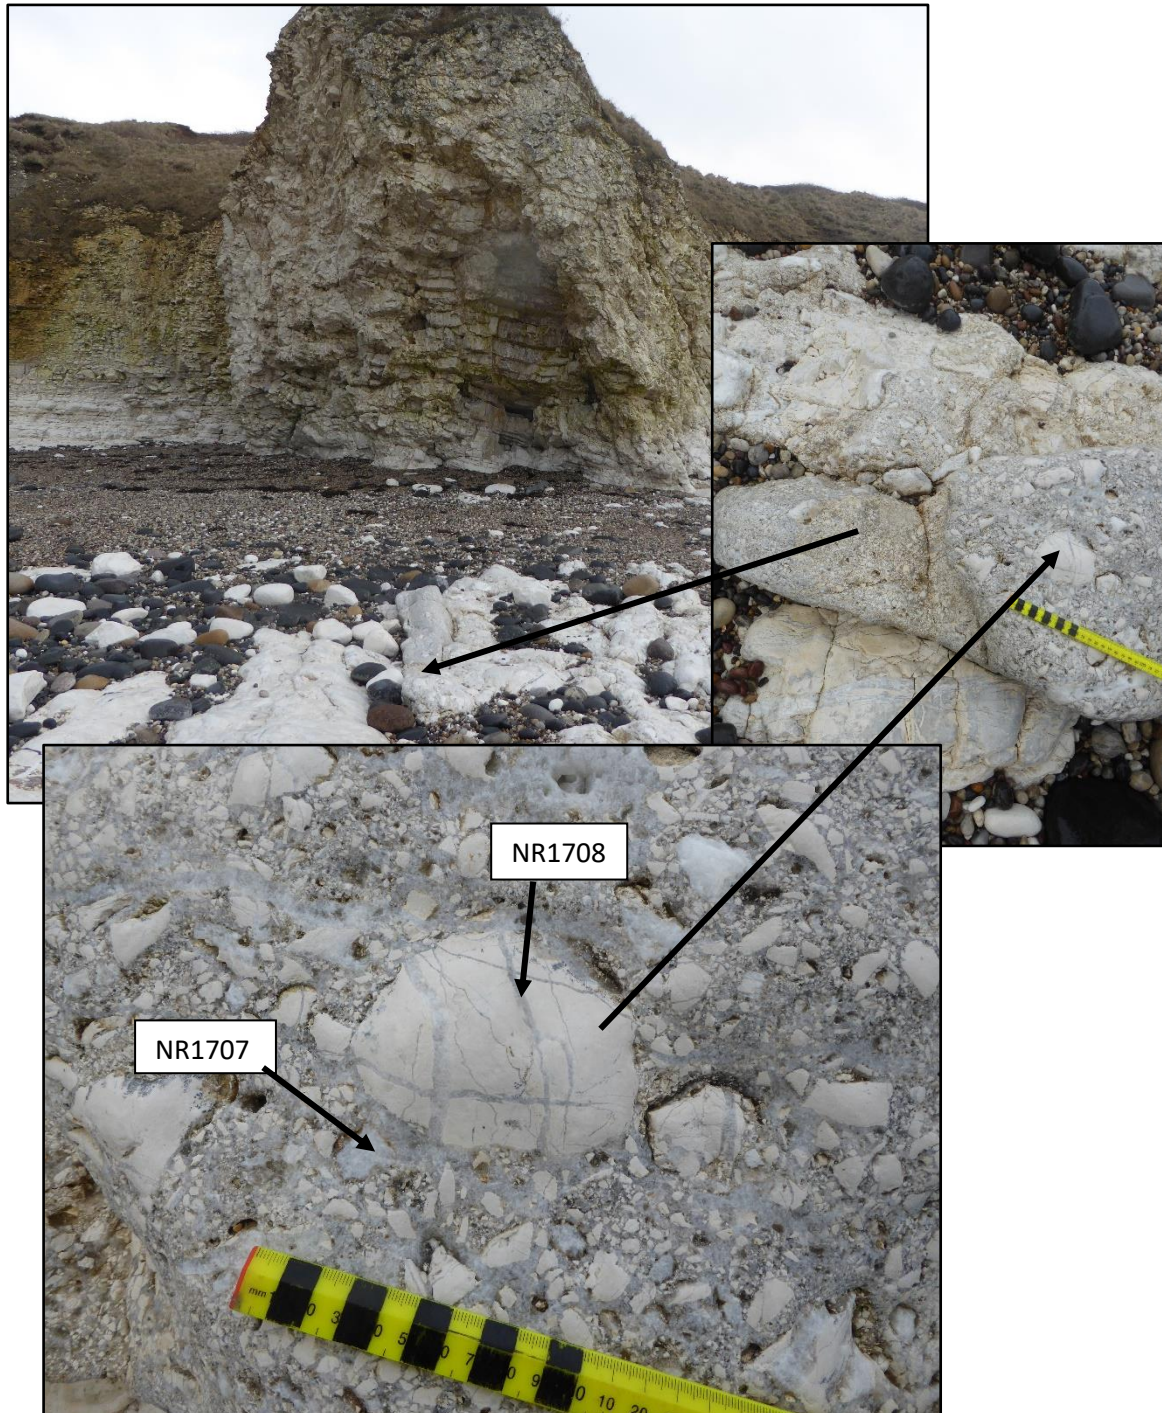



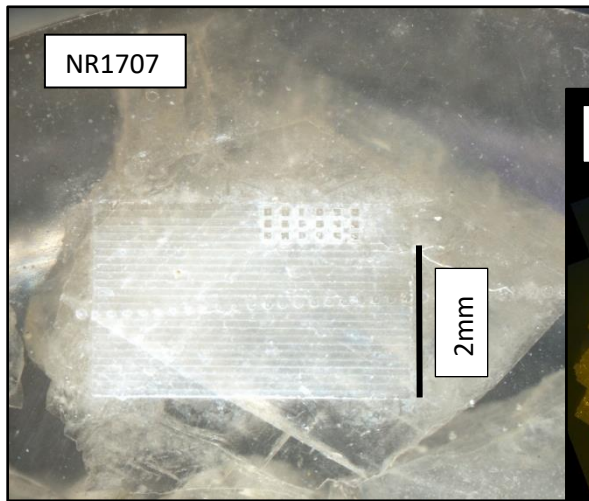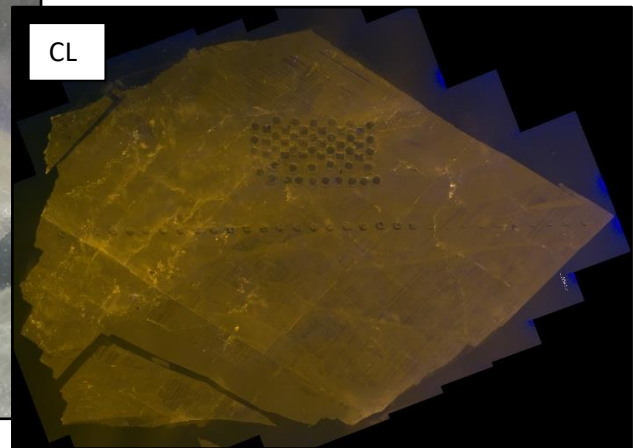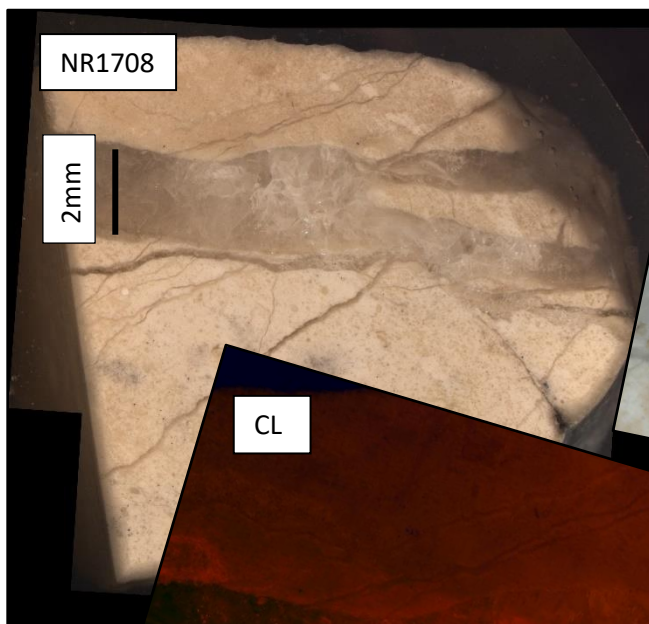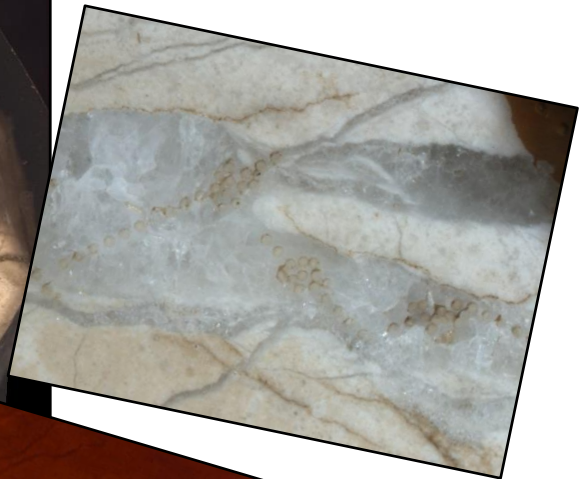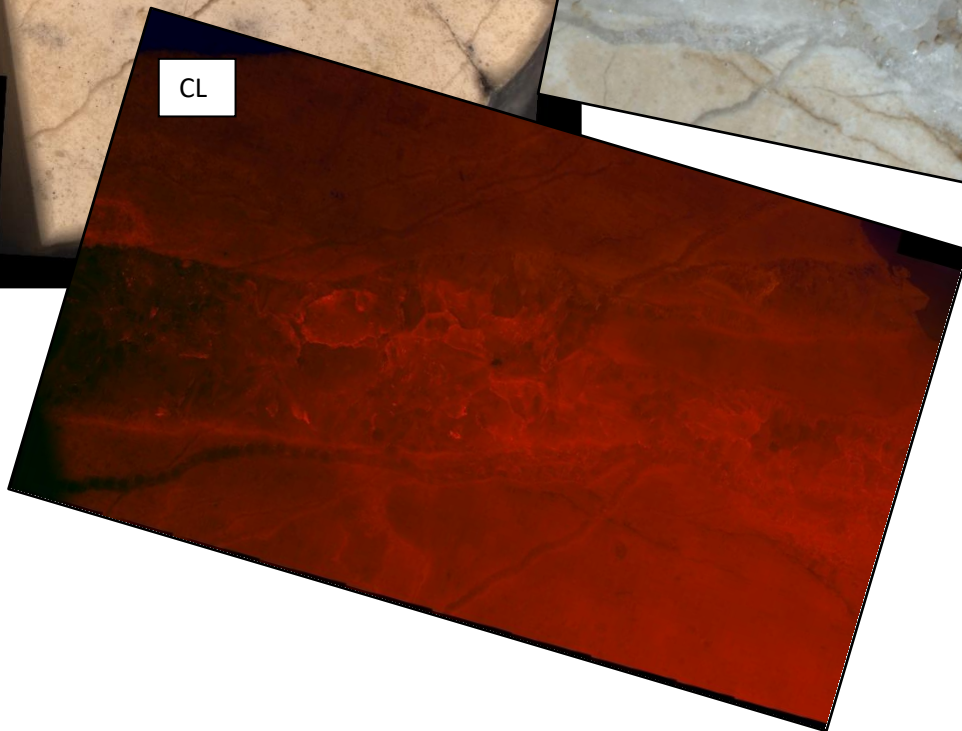

**CJ1a** - Large vuggy crystal within a tensile mode 1 vein hosted within the brecciated zone between Frontal Fault North and Frontal Fault South. Taken from the overhanging cliff.

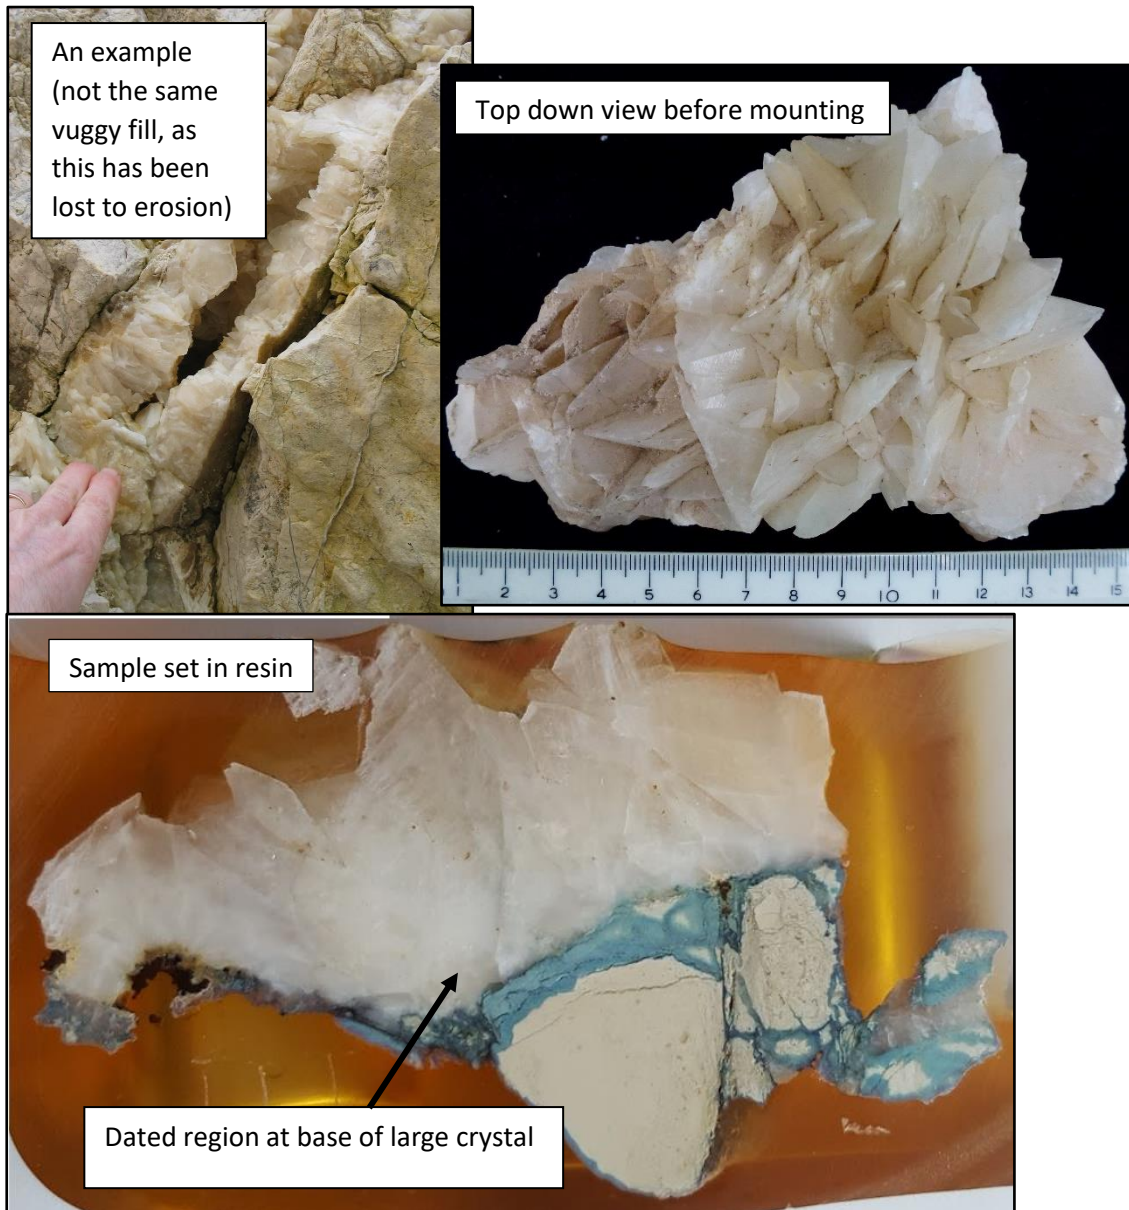



**NR1709** - Tensile Mode 1 opening vein, orientated E-W, located at north side of bay, on the foreshore pavement.

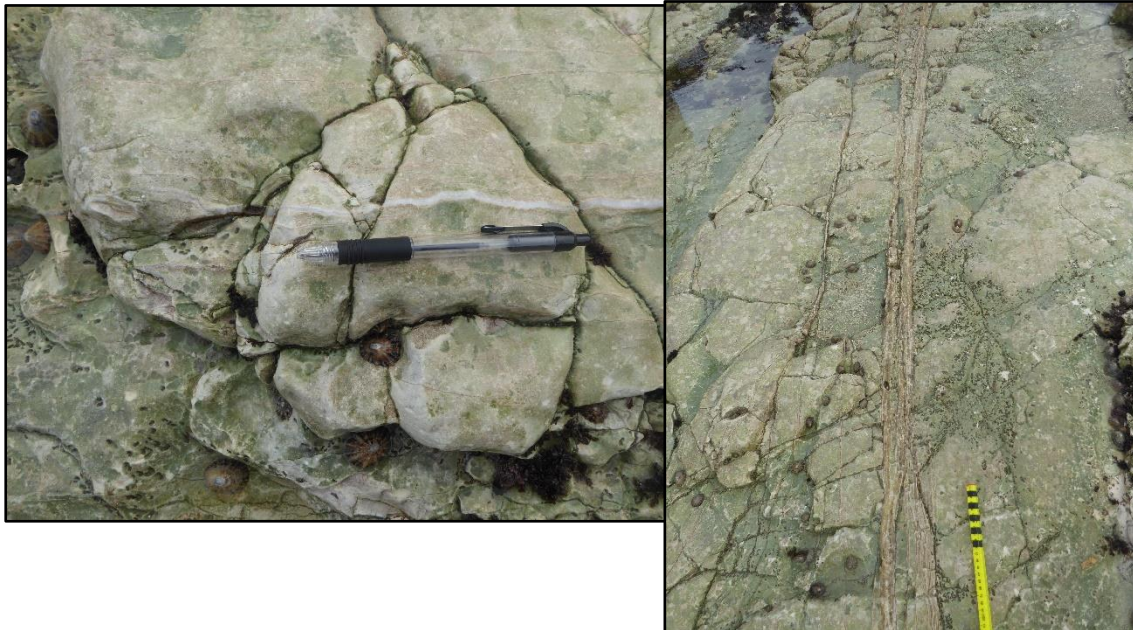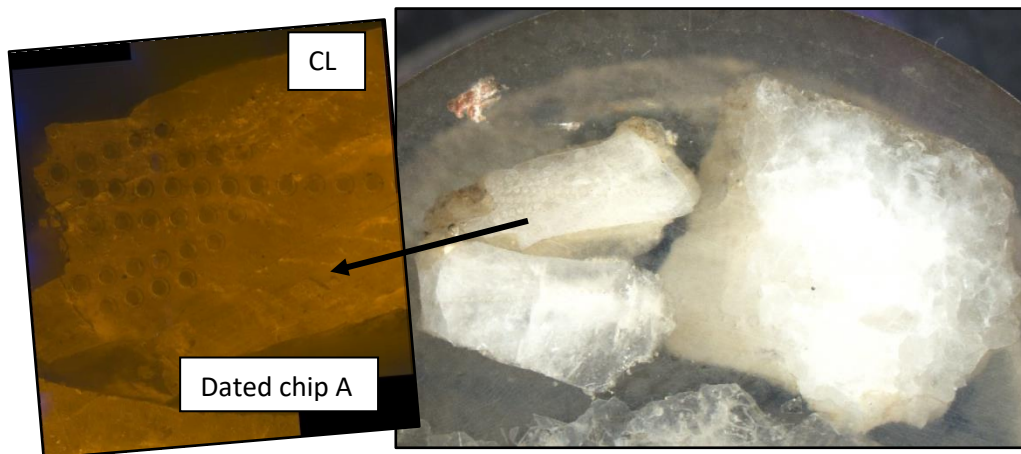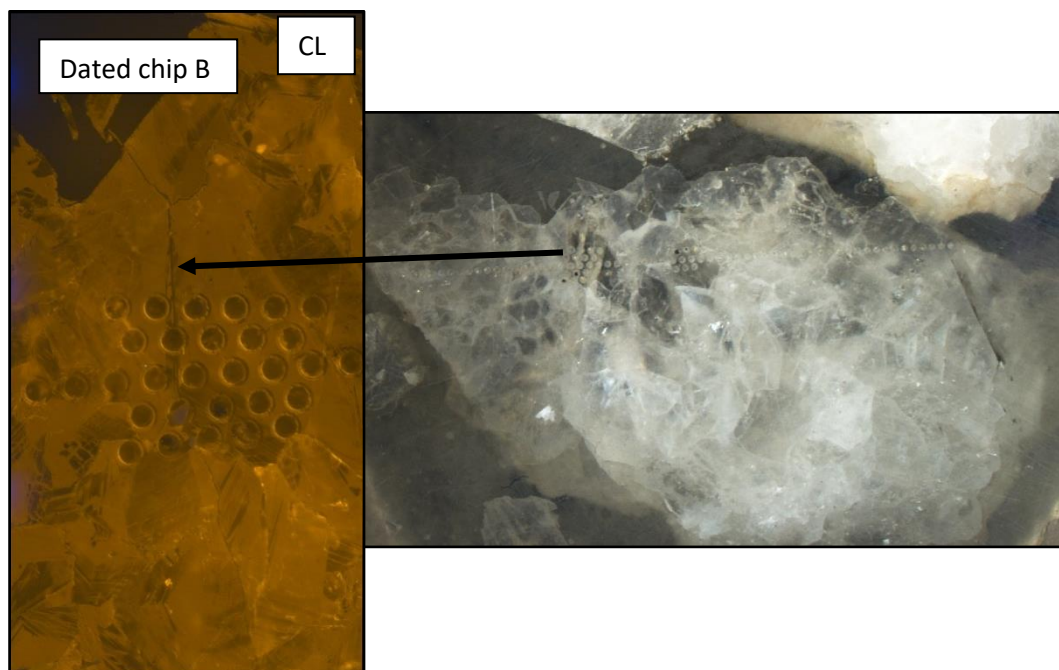



**NR1901** – Thin ( $<300\ \mu\text{m}$ ) vein cross-cutting slickenfibres adjacent to host rock. Slickenfibres formed on bedding plane during folding of beds.

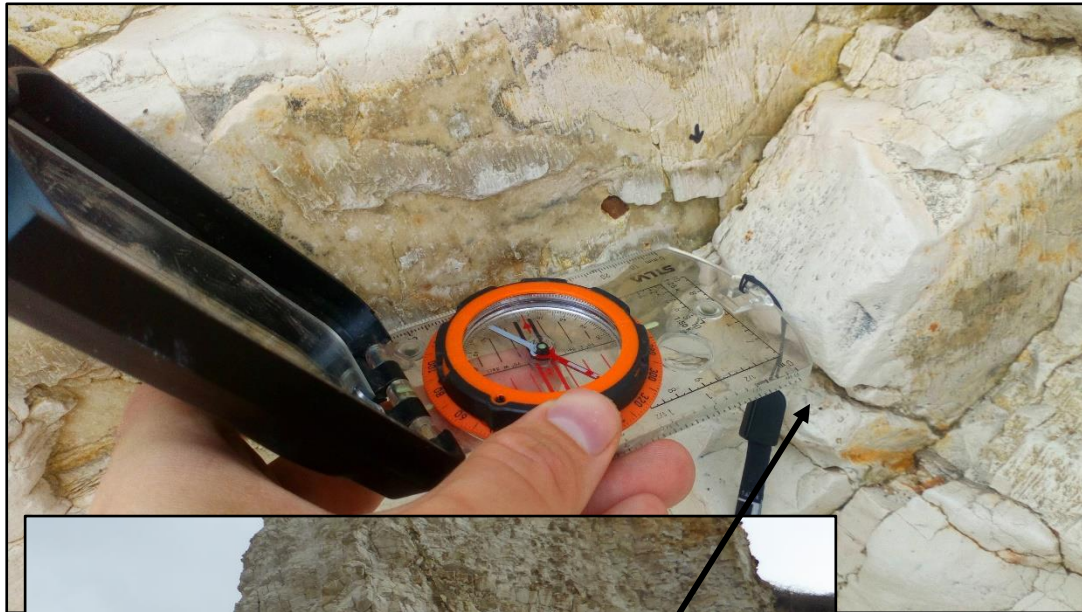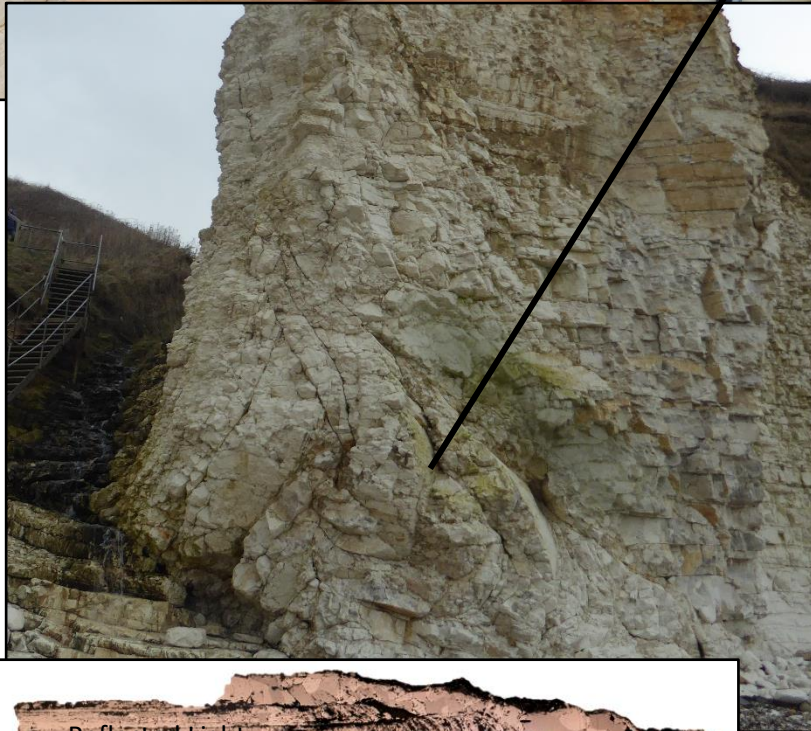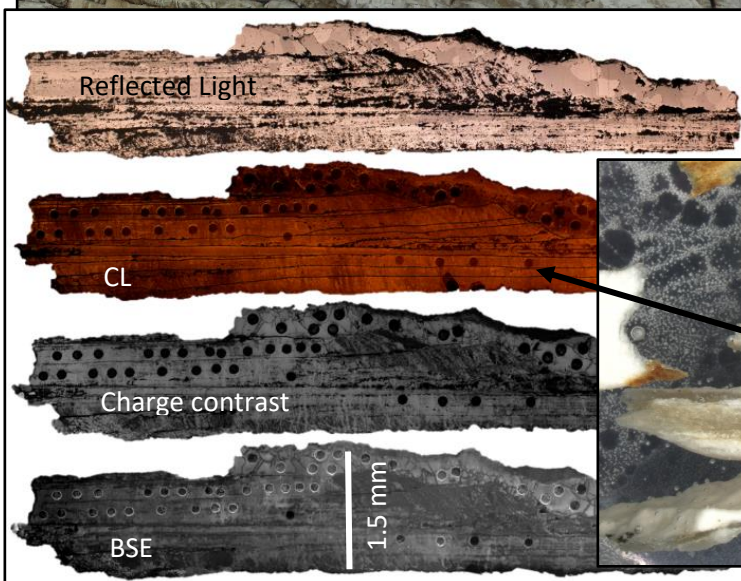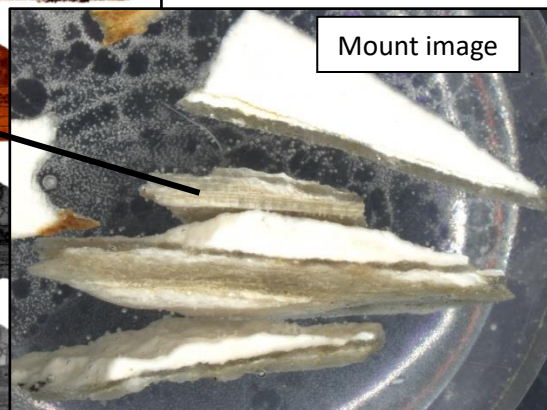

Supplement: Supplementary file 1 [file se-11-1931-2020-supplement.zip]
