# Supplementary material for: Near-surface Palaeocene fluid flow, mineralisation and faulting at Flamborough Head, UK: new field observations and U–Pb calcite dating constraints
Source: Copernicus journal article supplement (doi:10.5194/se-11-1931-2020), 2020-10-28
Supplement: Supplementary file 2 [file se-11-1931-2020-supplement.zip]

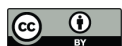

## *Supplement of*

# **Near-surface Palaeocene fluid flow, mineralisation and faulting at Flamborough Head, UK: new field observations and U–Pb calcite dating constraints**

**Nick M. W. Roberts et al.**

*Correspondence to:* Nick M. W. Roberts ([nirob@bgs.ac.uk](mailto:nirob@bgs.ac.uk))

- [se-11-1931-2020-supplement-title-page.pdf](#)
- [Chalk-Roberts\\_et\\_al\\_Supplement-Table.xlsx](#)
- [Chalk-Roberts\\_et\\_al\\_Supplement\\_Text.pdf](#)

The copyright of individual parts of the supplement might differ from the CC BY 4.0 License.
