# Supplementary material for: Near-surface Palaeocene fluid flow, mineralisation and faulting at Flamborough Head, UK: new field observations and U–Pb calcite dating constraints
Source: Copernicus journal article supplement (doi:10.5194/se-11-1931-2020), 2020-10-28
Supplement: Supplementary file 3 [file se-11-1931-2020-supplement.zip]

Archive with 3 entries (3 files):
- Chalk-Roberts_et_al_Supplement_Text.pdf
- Chalk-Roberts_et_al_Supplement-Table.xlsx
- se-11-1931-2020-supplement-title-page.pdf
