# Supplementary material for: Near-surface Palaeocene fluid flow, mineralisation and faulting at Flamborough Head, UK: new field observations and U–Pb calcite dating constraints
Source: Copernicus journal article supplement (doi:10.5194/se-11-1931-2020), 2020-10-28
Supplement: Supplementary file 3 [file se-11-1931-2020-supplement.zip › Chalk-Roberts_et_al_Supplement-Table.xlsx]

## Sheet: Sheet1
Date	Spot	204Pb cps1	206Pb cps	207Pb cps	208Pb cps	232Th cps	238U cps	Th/U	Pb ppm2	Th ppm2	U ppm2	238U/206Pb	1s %	207Pb/206Pb	1s %	207Pb/235U	1s %	206Pb/238U	1s %	Rho	207Pb/206Pb	2s abs	206Pb/238U	2s abs	207Pb/235U	2s abs	Rejected?
2016-08-04	NIST614_01	3861.08	66815.5	58838.2	142444	61673.9	113151	3.17049	0.525278	0.41551	0.762322	1.3921	1.44347	0.87395	0.524499	86.5213	1.53581	0.718341	1.44347	0.939877	5047.31	7.42893	3489.83	77.334	4540.67	30.3735
2016-08-04	NIST614_02	3470.71	64662.4	57117.5	138215	62177.7	109591	3.30023	0.508351	0.418904	0.738335	1.38768	1.44368	0.870614	0.535191	86.4655	1.53968	0.720628	1.44368	0.937644	5041.89	7.58214	3498.4	77.487	4540.03	30.4488
2016-08-04	NIST614_03	3383.62	65381.3	57462.5	138366	63280.6	111596	3.29839	0.514002	0.426335	0.751849	1.40182	1.44063	0.869799	0.483887	85.5133	1.51973	0.71336	1.44063	0.947955	5040.56	6.8557	3471.11	76.8722	4528.91	30.0561
2016-08-04	NIST614_04	3611.61	66833.9	58844.8	142042	62599.1	114664	3.17559	0.525422	0.421744	0.772515	1.41262	1.45007	0.869185	0.482156	84.7994	1.52813	0.707905	1.45007	0.948919	5039.56	6.83147	3450.56	77.0283	4520.5	30.2169
2016-08-04	NIST614_05	3353.16	61992.1	54336.4	130688	58964.2	103711	3.3071	0.487358	0.397255	0.698721	1.37937	1.44193	0.872311	0.517604	87.1562	1.53202	0.724971	1.44193	0.941197	5044.65	7.3321	3514.65	77.6628	4548.01	30.3021
2016-08-04	NIST614_06	3371.84	62080.6	54538.1	132186	61717.9	104942	3.42094	0.488053	0.415807	0.707015	1.3873	1.4257	0.869108	0.48947	86.3392	1.50738	0.720822	1.4257	0.945812	5039.43	6.93515	3499.13	76.5398	4538.56	29.8187
2016-08-04	NIST614_07	3324.78	61113.2	53677.6	129794	62359.4	105272	3.44565	0.480448	0.420129	0.709242	1.41869	1.45153	0.873426	0.536619	84.8484	1.54755	0.704874	1.45153	0.937956	5046.46	7.60087	3439.1	76.9131	4521.08	30.5954
2016-08-04	NIST614_08	3359.78	62276.7	54974.3	132423	62549.4	105932	3.43462	0.489595	0.421409	0.713686	1.39785	1.44448	0.869813	0.504171	85.7573	1.52993	0.715384	1.44448	0.944142	5040.58	7.14308	3478.72	77.2028	4531.77	30.256
2017-05-08	NIST614_01	7665.17	135779	118201	286550	128204	195591	1	1.28011	0.373383	0.569642	1.43463	1.03718	0.868792	0.363714	83.4608	1.09911	0.697044	1.03718	0.94366	5038.92	10.3069	3409.43	54.6924	4504.53	21.8199
2017-05-08	NIST614_02	7516.23	136433	120295	289544	129869	197529	1.00304	1.2937	0.378231	0.575287	1.43762	1.01712	0.869265	0.365279	83.3324	1.08072	0.695595	1.01712	0.941148	5039.69	10.3509	3403.92	53.5734	4502.99	21.4584
2017-05-08	NIST614_03	8138.56	142264	123745	297567	135342	206708	0.998903	1.33468	0.394172	0.602018	1.45241	1.04852	0.870138	0.369735	82.5667	1.1118	0.688511	1.04852	0.943083	5041.11	10.4766	3376.93	54.8883	4493.72	22.0663
2017-05-08	NIST614_04	7366.31	135250	118280	284938	124771	215409	0.883688	1.27522	0.363386	0.62736	1.55477	1.13853	0.869402	0.38852	77.0657	1.203	0.643183	1.13853	0.946412	5039.92	11.0094	3201.52	57.2022	4424.58	23.8351
2017-05-08	NIST614_05	8146.02	145620	127745	307132	133061	212378	0.955851	1.37476	0.38753	0.618533	1.44509	1.05048	0.874243	0.42088	83.3765	1.13166	0.691999	1.05048	0.928267	5047.78	11.9223	3390.24	55.1549	4503.52	22.4588
2017-05-08	NIST614_06	7948.23	143828	125744	304773	133251	208139	0.976706	1.36019	0.388082	0.606188	1.43656	1.05138	0.870012	0.392322	83.4659	1.1222	0.69611	1.05138	0.936898	5040.91	11.1166	3405.88	55.3944	4504.59	22.2733
2017-05-08	NIST614_07	7470.97	139242	121360	289530	125336	199148	0.960174	1.30284	0.365032	0.580001	1.42758	1.04097	0.870293	0.362285	84.0175	1.10221	0.700484	1.04097	0.944438	5041.37	10.2653	3422.48	55.0497	4511.2	21.8825
2017-05-08	NIST614_08	7821.13	141142	123601	296585	130200	205554	0.966346	1.32936	0.379197	0.598659	1.44954	1.03833	0.86916	0.353646	82.6373	1.0969	0.689875	1.03833	0.946602	5039.52	10.0213	3382.14	54.4209	4494.58	21.7741
2017-05-08	NIST614_09	7389.74	134255	117426	282815	126152	198039	0.971834	1.26582	0.367408	0.576772	1.45631	1.05551	0.869042	0.376318	82.242	1.12059	0.686668	1.05551	0.941925	5039.33	10.6639	3369.9	55.1656	4489.77	22.2378
2017-05-08	NIST614_10	7417.66	137069	120535	291361	130481	197667	1.00707	1.30008	0.380014	0.575687	1.43413	1.02779	0.873653	0.364717	83.9569	1.09059	0.697286	1.02779	0.942423	5046.82	10.3318	3410.35	54.2104	4510.48	21.654
2019-02-25	NIST614_01	8014.79	143010	125964	305278	92745.1	202003	0.459127	1.33184	0.328723	0.715974	1.42791	1.53182	0.870817	0.43471	84.0488	1.59231	0.700324	1.53182	0.962012	5042.22	12.317	3421.88	80.8349	4511.58	31.4634
2019-02-25	NIST614_02	8013.81	142595	124524	302993	98873.6	200723	0.492586	1.32223	0.350444	0.711437	1.42812	1.54416	0.871591	0.434122	84.1113	1.60402	0.700222	1.54416	0.962679	5043.48	12.2997	3421.49	81.4747	4512.32	31.6915
2019-02-25	NIST614_03	8052.76	139801	122667	297286	109120	198514	0.549686	1.29821	0.386763	0.703606	1.43218	1.54001	0.872557	0.436886	83.9659	1.60078	0.698238	1.54001	0.962037	5045.05	12.3772	3413.96	81.1225	4510.59	31.6278
2019-02-25	NIST614_04	8042.32	139564	121857	295580	123856	195412	0.633818	1.29182	0.438989	0.692611	1.42198	1.54713	0.86641	0.457174	83.9725	1.61326	0.703247	1.54713	0.959006	5035.03	12.9576	3432.95	81.8362	4510.66	31.8706
2019-02-25	NIST614_05	8021.56	137586	120351	292294	127629	191090	0.667897	1.27613	0.452363	0.677294	1.39878	1.54234	0.868618	0.462528	85.5824	1.6102	0.714907	1.54234	0.957856	5038.64	13.1073	3476.93	82.3685	4529.72	31.818
2019-02-25	NIST614_06	7817.65	140767	122464	296091	133870	194316	0.68893	1.29721	0.474484	0.688727	1.39651	1.57472	0.866483	0.584226	85.5108	1.6796	0.716069	1.57472	0.937556	5035.15	16.5585	3481.3	84.1656	4528.88	33.1669
2019-02-25	NIST614_07	7974.22	143010	126365	306237	118012	195383	0.604001	1.33499	0.418277	0.69251	1.38131	1.55482	0.872085	0.522507	87.011	1.64027	0.723952	1.55482	0.947906	5044.28	14.8034	3510.84	83.6358	4546.34	32.4088
2019-02-25	NIST614_08	7819.51	139463	121867	296402	111676	197361	0.565848	1.29352	0.395821	0.699519	1.43072	1.53465	0.869432	0.487618	83.7502	1.61026	0.698947	1.53465	0.953048	5039.96	13.8175	3416.66	80.8899	4508	31.8111
2019-02-25	NIST614_09	7715.31	139262	123229	297276	116677	189860	0.614543	1.29824	0.413547	0.672935	1.38324	1.54546	0.875596	0.535745	87.2391	1.63569	0.722938	1.54546	0.944839	5049.97	15.1747	3507.05	83.0685	4548.97	32.3206
2019-02-25	NIST614_10	7764.46	139163	121316	296483	110754	192418	0.57559	1.29173	0.392552	0.682	1.4021	1.54427	0.869889	0.49487	85.505	1.62163	0.713218	1.54427	0.952298	5040.71	14.0225	3470.58	82.3577	4528.81	32.0399
2019-02-25	NIST614_11	7914.18	141307	123503	298370	119030	195309	0.609447	1.30615	0.421888	0.692247	1.39914	1.5311	0.870304	0.511444	85.7269	1.61426	0.714727	1.5311	0.948483	5041.38	14.4917	3476.25	81.7597	4531.42	31.8975
2019-02-25	NIST614_12	7883.68	139304	122388	296916	111808	194327	0.575357	1.29555	0.396287	0.688767	1.39528	1.55465	0.872689	0.486205	86.1995	1.6289	0.716703	1.55465	0.954414	5045.26	13.7743	3483.68	83.1421	4536.93	32.1844
2019-02-25	NIST614_13	7241.78	127833	112297	273849	106793	177961	0.600091	1.19205	0.378514	0.63076	1.40094	1.53517	0.871693	0.460662	85.7528	1.6028	0.713804	1.53517	0.957807	5043.64	13.0516	3472.78	81.9144	4531.72	31.6746
2019-02-25	NIST614_14	7351.47	130536	113866	277423	112535	178800	0.629393	1.21024	0.398867	0.633732	1.38869	1.5571	0.86348	0.547688	85.6946	1.65061	0.720104	1.5571	0.943347	5030.23	15.5262	3496.44	83.5006	4531.04	32.6043
2019-02-25	NIST614_15	7026.56	125019	110041	266312	110177	173728	0.634191	1.16281	0.390506	0.615755	1.40422	1.54327	0.870187	0.493462	85.4053	1.62025	0.712141	1.54327	0.952493	5041.19	13.9824	3466.53	82.2327	4527.64	32.0126
2019-02-25	NIST614_16	7390.3	132930	116087	280926	117183	181826	0.644479	1.22907	0.415338	0.644457	1.39665	1.53437	0.869247	0.465427	85.7754	1.60341	0.716001	1.53437	0.956944	5039.66	13.1888	3481.04	82.0181	4531.98	31.6867
2019-02-25	NIST614_17	7338.23	129447	114170	277197	115216	181761	0.633883	1.2079	0.408366	0.644229	1.41815	1.55017	0.870154	0.497957	84.5632	1.62819	0.705146	1.55017	0.952085	5041.14	14.1097	3440.13	82.1253	4517.7	32.1635
2019-02-25	NIST614_18	7323.31	131112	115291	277974	115472	182224	0.63368	1.21616	0.409275	0.64587	1.40088	1.53548	0.868672	0.463636	85.4596	1.60395	0.713837	1.53548	0.957311	5038.72	13.1386	3472.91	81.9332	4528.28	31.6959
2019-02-25	NIST614_19	7290.86	119380	105386	253913	111526	167014	0.667764	1.11018	0.395288	0.591958	1.41395	1.54842	0.87361	0.461618	85.1507	1.61576	0.707236	1.54842	0.95832	5046.76	13.0769	3448.03	82.1744	4524.65	31.9243
2019-02-25	NIST614_20	6858.44	119816	105405	254362	111930	168146	0.665671	1.11227	0.396721	0.595971	1.42272	1.54461	0.872087	0.452063	84.4788	1.60941	0.702881	1.54461	0.959741	5044.28	12.8076	3431.57	81.6791	4516.7	31.7978
2019-02-25	NIST614_21	6756.59	121798	106811	257923	112834	171057	0.659631	1.12839	0.399926	0.606288	1.41721	1.54223	0.870977	0.44932	84.6992	1.60635	0.705613	1.54223	0.960083	5042.48	12.7309	3441.9	81.7388	4519.31	31.7394
2019-02-26	NIST614_01	6677.71	121952	106727	258380	112230	168925	0.664378	1.12961	0.397785	0.598734	1.39597	1.53766	0.868146	0.441824	85.7083	1.59988	0.716349	1.53766	0.961112	5037.87	12.521	3482.35	82.216	4531.2	31.6177
2019-02-26	NIST614_02	6800.18	122046	106510	258235	108674	169304	0.641887	1.12899	0.385181	0.600076	1.40117	1.53944	0.868115	0.445382	85.3868	1.60257	0.713687	1.53944	0.960605	5037.82	12.6218	3472.34	82.133	4527.43	31.6687
2019-02-26	NIST614_03	7377.22	130290	114848	275726	110858	183930	0.602716	1.20801	0.39292	0.651916	1.42187	1.53606	0.870215	0.445431	84.3478	1.59934	0.703301	1.53606	0.960434	5041.24	12.6213	3433.16	81.2583	4515.14	31.6015
2019-02-26	NIST614_04	8833.74	156048	136411	329512	128028	205898	0.621802	1.44251	0.453778	0.72978	1.33692	1.55378	0.871523	0.440495	89.842	1.61502	0.747988	1.55378	0.962085	5043.37	12.4803	3600.1	85.1576	4578.49	31.9289
2019-02-26	NIST614_05	8571.79	158203	139242	335495	126118	213438	0.590887	1.46795	0.447007	0.756501	1.36574	1.53927	0.873778	0.437798	88.1734	1.60032	0.732201	1.53927	0.961852	5047.03	12.402	3541.62	83.3461	4559.66	31.6363
2019-02-26	NIST614_06	9049.41	162671	142968	346740	134098	218976	0.612386	1.51303	0.475291	0.77613	1.36727	1.54228	0.872447	0.437713	87.941	1.60319	0.731386	1.54228	0.962007	5044.87	12.4007	3538.58	83.4547	4557.01	31.6913
2019-02-26	NIST614_07	9187.86	163007	143004	351669	120104	232007	0.517676	1.35143	0.396594	0.766105	1.41301	1.15762	0.867736	0.448351	84.6349	1.24142	0.707711	1.15762	0.932503	5037.2	12.7063	3449.82	61.5577	4518.55	24.6151
2019-02-26	NIST614_08	9372.8	158825	139688	338380	121197	224419	0.540046	1.30872	0.400201	0.741049	1.40911	1.16136	0.867103	0.436694	84.8073	1.24075	0.70967	1.16136	0.936015	5036.16	12.3765	3457.22	61.8548	4520.59	24.6026
2019-02-26	NIST614_09	9826.67	165044	145147	353976	120078	234609	0.511823	1.36476	0.396508	0.774698	1.42207	1.15899	0.873059	0.455448	84.6111	1.24526	0.703198	1.15899	0.930716	5045.86	12.9026	3432.77	61.4001	4518.27	24.6904
2019-02-26	NIST614_10	8039.28	143416	125910	306749	116474	202086	0.576361	1.18375	0.384607	0.667302	1.40882	1.14003	0.868083	0.45117	84.9205	1.22606	0.709815	1.14003	0.929832	5037.76	12.7859	3457.76	60.7315	4521.93	24.3152
2019-02-26	NIST614_11	8276.91	147590	130733	313749	117234	209808	0.558768	1.21662	0.387116	0.692802	1.41989	1.16013	0.874481	0.497735	84.8791	1.2624	0.704279	1.16013	0.918991	5048.17	14.0992	3436.85	61.5157	4521.44	25.0268
2019-02-26	NIST614_12	8422.45	145970	129097	311121	122976	208862	0.588791	1.20453	0.406076	0.689678	1.42427	1.14408	0.871938	0.473756	84.3723	1.23829	0.702115	1.14408	0.923919	5044.04	13.4223	3428.67	60.5597	4515.43	24.553
2019-05-08	NIST614_01	13295.8	242960	212071	517943	206055	345834	0.595821	1.29144	0.429228	0.720398	1.47364	1.26254	0.871137	0.4308	81.4704	1.33401	0.67859	1.26254	0.946421	5042.74	12.206	3338.95	65.4709	4480.32	26.4156
2019-05-08	NIST614_02	14150.1	253455	221802	534790	211136	345767	0.610631	1.34064	0.439811	0.720257	1.42848	1.22521	0.869661	0.421701	83.9036	1.29575	0.700043	1.22521	0.945559	5040.34	11.9494	3420.81	64.7202	4509.84	25.6763
2019-05-08	NIST614_03	13619.5	245486	214024	522950	202240	334741	0.604166	1.30403	0.42128	0.697291	1.4247	1.23329	0.871295	0.43148	84.2843	1.30659	0.701901	1.23329	0.943899	5043	12.2251	3427.85	65.2463	4514.38	25.8898
2019-05-08	NIST614_04	11418.4	209739	185105	440300	175953	286308	0.614558	1.10849	0.366522	0.596401	1.4282	1.22434	0.868861	0.437711	83.8433	1.30023	0.700184	1.22434	0.941633	5039.03	12.4038	3421.35	64.6824	4509.12	25.7638
2019-05-08	NIST614_05	11514.6	204033	179389	433656	173343	281680	0.615391	1.08451	0.361086	0.58676	1.43022	1.23316	0.872804	0.429411	84.1048	1.30579	0.699194	1.23316	0.944381	5045.45	12.1652	3417.59	65.0921	4512.24	25.8734
2019-05-08	NIST614_06	12152.2	214052	188031	453705	178303	293077	0.608383	1.13589	0.371418	0.6105	1.42289	1.22044	0.871663	0.425591	84.4271	1.29252	0.702793	1.22044	0.944235	5043.59	12.058	3431.23	64.618	4516.08	25.615
2019-05-10	NIST614_01	13687.2	244218	213657	515750	148992	335726	0.443792	1.88494	0.382243	0.861312	1.43515	1.24941	0.867099	0.416458	83.2677	1.31699	0.69679	1.24941	0.948686	5036.16	11.803	3408.47	65.8123	4502.21	26.0895
2019-05-10	NIST614_02	13287.1	241854	212466	514512	147511	333339	0.442524	1.87566	0.378441	0.855188	1.43345	1.25729	0.870392	0.41381	83.683	1.32364	0.697616	1.25729	0.949875	5041.53	11.7252	3411.6	66.2714	4507.2	26.2211
2019-05-10	NIST614_03	13186.9	240021	208736	505086	144101	330207	0.436395	1.84664	0.369693	0.847151	1.43487	1.24735	0.871688	0.427775	83.7246	1.31866	0.696925	1.24735	0.94592	5043.63	12.1198	3408.98	65.7119	4507.7	26.1239
2019-05-10	NIST614_04	12010.1	218694	191776	463197	123498	302943	0.407659	1.69142	0.316836	0.777207	1.44207	1.2608	0.869561	0.439027	83.1035	1.33506	0.693447	1.2608	0.944384	5040.17	12.4405	3395.75	66.2224	4500.23	26.4422
2019-05-10	NIST614_05	12064.1	219258	192615	466966	124171	328847	0.377595	1.70143	0.318563	0.843663	1.5618	1.25849	0.870182	0.429343	76.7877	1.32972	0.640289	1.25849	0.946439	5041.18	12.1655	3190.15	63.0275	4420.96	26.3124
2019-05-10	NIST614_06	12004.9	220552	194536	470820	122384	296725	0.412449	1.71512	0.313978	0.761254	1.40492	1.25945	0.874797	0.421006	85.8145	1.32795	0.711783	1.25945	0.948414	5048.68	11.9254	3465.18	67.168	4532.44	26.313
2019-05-10	NIST614_07	11418.4	209739	185105	440300	175953	286308	0.614558	1.61684	0.45141	0.734528	1.42438	1.22434	0.867715	0.437711	83.9572	1.30023	0.702061	1.22434	0.941633	5037.16	12.4048	3428.46	64.7838	4510.48	25.7642
2019-05-10	NIST614_08	11514.6	204033	179389	433656	173343	281680	0.615391	1.58187	0.444715	0.722654	1.4264	1.23316	0.871653	0.429411	84.219	1.30579	0.701068	1.23316	0.944381	5043.58	12.1662	3424.7	65.1941	4513.61	25.8738
2019-05-10	NIST614_09	12152.2	214052	188031	453705	178303	293077	0.608383	1.65681	0.457439	0.751893	1.41909	1.22044	0.870513	0.425591	84.5418	1.29252	0.704677	1.22044	0.944235	5041.72	12.0589	3438.36	64.719	4517.44	25.6154
2016-08-04	WC1_01	bd	22941.9	1805.28	1697.09	30.0265	646378	0.00027021	0.18036	0.0011767	4.35478	23.1555	1.514	0.0789737	1.07058	0.470039	1.85428	0.0431862	1.514	0.816492	1171.48	21.1926	272.553	8.07581	391.216	11.9695
2016-08-04	WC1_02	151.119	25507.7	2225.11	2468.81	74.4588	716215	0.000604722	0.200532	0.00291796	4.82529	23.1184	1.48947	0.086194	1.43212	0.513838	2.06628	0.0432557	1.48947	0.720848	1342.54	27.6658	272.982	7.95728	421.026	14.1438
2016-08-04	WC1_03	bd	28094.9	1753.98	813.723	49.8806	819474	0.000354062	0.220871	0.00195476	5.52097	24.1666	1.51006	0.0626801	1.20887	0.357455	1.93433	0.0413795	1.51006	0.780662	697.395	25.7537	261.378	7.73139	310.313	10.2916
2016-08-04	WC1_04	bd	26866.6	1741.49	785.871	75.6871	772266	0.000570082	0.211215	0.00296609	5.20292	23.912	1.49199	0.0634873	1.18066	0.365912	1.90262	0.0418199	1.49199	0.784174	724.596	25.0412	264.104	7.71691	316.619	10.2982
2016-08-04	WC1_05	bd	29323.6	1780.53	707.371	176.059	877444	0.00116714	0.230531	0.00689955	5.91152	24.2988	1.53523	0.0606382	1.04291	0.343928	1.85596	0.0411543	1.53523	0.827189	626.423	22.4803	259.984	7.81912	300.144	9.59987
2016-08-04	WC1_06	162.358	26427.6	1782.26	1139.13	101.418	814353	0.000724411	0.207764	0.00397446	5.48647	25.3457	1.50288	0.0668189	1.30355	0.363329	1.98945	0.0394544	1.50288	0.755426	832.133	27.1736	249.45	7.35046	314.697	10.7102
2016-08-04	WC1_07	68.6465	27627.7	2118.53	1842.38	265.229	787942	0.00195799	0.217198	0.010394	5.30853	23.3544	1.49599	0.0766128	1.22557	0.452104	1.93391	0.0428185	1.49599	0.773558	1111.13	24.477	270.28	7.9147	378.752	12.1545
2016-08-04	WC1_08	87.6065	36353.5	2984.93	3042.89	1310.58	1036429	0.00735538	0.285797	0.05136	6.98264	23.5267	1.62245	0.0873685	3.137	0.5118	3.53173	0.042505	1.62245	0.459391	1368.63	60.3813	268.341	8.52301	419.659	23.9945
2016-08-04	WC1_09	bd	19577.8	1601.88	1471.3	70.168	566075	0.000721021	0.153913	0.0027498	3.81377	23.6788	1.49433	0.079257	1.81564	0.4613	2.3515	0.0422318	1.49433	0.635479	1178.56	35.9043	266.652	7.80203	385.161	14.9639
2016-08-04	WC1_10	bd	25183.8	2221.52	2575.59	44.9075	742375	0.000351867	0.197986	0.00175987	5.00154	23.9725	1.48868	0.0878862	1.19997	0.505258	1.9121	0.0417145	1.48868	0.77856	1380	23.0609	263.451	7.68121	415.256	12.9509
2016-08-04	WC1_11	119.843	22044.8	1816.62	1674.87	55.5258	645500	0.000500358	0.173308	0.00217599	4.34887	24.1545	1.50991	0.0817474	1.26845	0.466426	1.972	0.0414002	1.50991	0.765674	1239.47	24.8638	261.506	7.73435	388.717	12.6584
2016-08-04	WC1_12	35.0989	26672.6	2526.05	2997.77	360.014	773898	0.00270594	0.20969	0.0141085	5.21392	23.8217	1.46783	0.0929916	1.48159	0.537992	2.08558	0.0419785	1.46783	0.7038	1487.72	28.0585	265.085	7.61965	437.1	14.7082
2016-08-04	WC1_13	167.87	25283.3	2195.86	2386.19	146.655	732672	0.00116431	0.198767	0.00574725	4.93617	23.9322	1.5673	0.0882085	1.74837	0.507964	2.34803	0.0417846	1.5673	0.667499	1387.03	33.5673	263.885	8.09967	417.079	15.9365
2016-08-04	WC1_14	121.587	23645.4	2294.46	2925.23	130.526	695867	0.00109107	0.185891	0.00511517	4.6882	24.0652	1.49815	0.0968917	1.39157	0.554884	2.04473	0.0415537	1.49815	0.732689	1565.12	26.0842	262.456	7.70144	448.191	14.7113
2016-08-04	WC1_15	78.4452	22141.5	1798.02	1724.08	58.7516	656137	0.000520844	0.174068	0.00230241	4.42053	24.2269	1.4976	0.0810129	1.14177	0.460852	1.8832	0.0412764	1.4976	0.795241	1221.76	22.4378	260.74	7.64931	384.851	11.9935
2016-08-04	WC1_16	85.2023	21519.1	1985.54	2115.88	227.981	618952	0.00214252	0.169175	0.00893434	4.17001	23.5748	1.54044	0.0909391	1.75563	0.531628	2.33563	0.0424182	1.54044	0.659537	1445.33	33.439	267.804	8.07661	432.89	16.3313
2016-08-04	WC1_17	39.3436	26028.2	2748.34	3564.76	713.017	729799	0.00568302	0.204623	0.0279423	4.91681	23.0624	1.56225	0.102078	2.81841	0.610006	3.22243	0.0433607	1.56225	0.484804	1662.24	52.169	273.631	8.36522	483.564	24.4963
2016-08-04	WC1_18	72.346	26622.3	1929.96	1426.44	229.075	813369	0.00163822	0.209294	0.00897719	5.47984	25.0007	1.53485	0.0727897	1.19145	0.401258	1.94301	0.0399989	1.53485	0.789932	1008.1	24.1665	252.826	7.60629	342.56	11.2366
2016-08-04	WC1_19	bd	27939.8	1930.49	1244.69	74.8807	824537	0.000528253	0.219652	0.00293449	5.55508	24.1583	1.50145	0.0681065	0.985534	0.388534	1.79601	0.0413937	1.50145	0.835996	871.797	20.4159	261.466	7.6899	333.298	10.1547
2016-08-04	WC1_20	2.66958	24751	1602.69	774.692	82.668	742628	0.000647513	0.194583	0.00323967	5.00324	24.5216	1.51069	0.0643213	1.03447	0.361503	1.83093	0.0407804	1.51069	0.825095	752.215	21.8424	257.668	7.6271	313.336	9.82479
2016-08-04	WC1_21	38.8493	25442.4	1697.3	1018	29.2328	749851	0.000226766	0.200018	0.0011456	5.05191	24.1565	1.56829	0.0663577	1.73143	0.378585	2.33611	0.0413968	1.56829	0.671326	817.679	36.1763	261.485	8.03256	325.997	12.9453
2016-08-04	WC1_22	138.044	29049.4	2609.53	2743.54	41.2616	853787	0.000281112	0.228375	0.001617	5.75215	24.47	1.57876	0.0897919	3.2554	0.505719	3.61803	0.0408663	1.57876	0.436358	1421.11	62.2095	258.201	7.98665	415.566	24.3822
2016-08-04	WC1_23	bd	25531.9	1777.71	1103.88	57.8043	743857	0.000452016	0.200722	0.00226529	5.01152	23.6624	1.50771	0.0683586	1.16354	0.398145	1.90447	0.0422612	1.50771	0.791669	879.447	24.0744	266.834	7.87709	340.302	10.9541
2016-08-04	WC1_24	173.905	24364.7	1741.67	1279.42	33.7515	695224	0.000282391	0.191546	0.00132268	4.68387	23.5631	1.55366	0.0701972	1.81681	0.410576	2.39053	0.0424392	1.55366	0.649923	934.127	37.2717	267.935	8.1498	349.29	14.0329
2016-08-04	WC1_25	97.1636	17060.5	1283.64	1072.8	25.9972	498637	0.000303266	0.134123	0.0010188	3.35943	23.6905	1.53321	0.0745217	1.16932	0.433525	1.92822	0.042211	1.53321	0.79514	1055.63	23.5479	266.523	8.00109	365.677	11.7735
2017-05-08	WC1_01	194.171	51838.7	8448.37	5292.9	369.855	1191869	0.000473424	0.155309	0.00107717	3.47122	23.8988	1.09508	0.0885782	2.08301	0.510807	2.35332	0.0418431	1.09508	0.465333	1395.05	79.896	264.247	5.66793	418.991	16.0309
2017-05-08	WC1_02	209.267	57931.7	5007.2	4706.55	152.817	1371390	0.000170003	0.160201	0.000445066	3.99406	23.6149	1.25403	0.0855709	1.07589	0.499397	1.65231	0.0423462	1.25403	0.758954	1328.51	41.6498	267.359	6.56502	411.294	11.1148
2017-05-08	WC1_03	138.339	68310.2	5693.78	5165.32	280.161	1684495	0.000253739	0.187492	0.000815946	4.90595	24.4742	1.04599	0.0833419	2.0556	0.469312	2.30642	0.0408594	1.04599	0.453513	1277.24	80.1535	258.158	5.29173	390.713	14.8513
2017-05-08	WC1_04	bd	67747.1	5574.16	4914.68	500.49	1650673	0.000462574	0.185282	0.00145763	4.80745	24.2596	1.06961	0.0773206	1.47634	0.439255	1.82308	0.0412207	1.06961	0.586704	1129.47	58.8109	260.395	5.45711	369.727	11.2367
2017-05-08	WC1_05	bd	76067.2	5239.85	3269.93	488.584	1903538	0.000391584	0.200299	0.00142296	5.54389	24.8675	1.06019	0.069012	0.935782	0.38247	1.4141	0.0402131	1.06019	0.749725	899.098	38.6049	254.154	5.28199	328.854	7.91387
2017-05-08	WC1_06	100.847	59105	5600.29	6179.12	290.602	1401091	0.000316432	0.167871	0.000846353	4.08056	23.4451	1.09254	0.0946287	1.24173	0.55626	1.65394	0.0426529	1.09254	0.660566	1520.69	46.8252	269.256	5.7597	449.089	11.935
2017-05-08	WC1_07	222.011	83823.6	7905.89	8970.27	1909.6	1975617	0.00147464	0.238481	0.00556154	5.75381	23.3614	1.11665	0.0934972	1.60706	0.551576	1.95693	0.0428056	1.11665	0.570614	1497.98	60.7858	270.2	5.90696	446.029	14.0302
2017-05-08	WC1_08	298.841	75831.5	8754.73	11184.8	1539.25	1703996	0.00137812	0.226809	0.00448292	4.96274	22.5841	1.09148	0.111633	1.46589	0.681236	1.82761	0.044279	1.09148	0.597219	1826.18	53.1677	279.302	5.9641	527.521	14.9285
2017-05-08	WC1_09	234.026	127806	10600.3	6782.77	3392.85	2994152	0.00172877	0.343843	0.00988137	8.72021	24.442	1.14018	0.0921856	5.29068	0.519795	5.41215	0.0409132	1.14018	0.210671	1471.21	200.836	258.491	5.77533	425.015	36.9113
2017-05-08	WC1_10	504.387	93079.9	13432	18625.7	1449.73	2007523	0.00110172	0.296356	0.0042222	5.84674	22.3234	1.54802	0.130121	8.76939	0.803327	8.90497	0.044796	1.54802	0.173838	2099.59	308.031	282.493	8.55157	598.703	77.5222
2017-05-08	WC1_11	16.8266	63927.1	4938.6	3523.76	375.078	1508448	0.000379349	0.171436	0.00109238	4.39323	23.3786	1.1204	0.078302	2.0852	0.461595	2.36714	0.0427742	1.1204	0.473313	1154.55	82.7597	270.006	5.9226	385.367	15.0692
2017-05-08	WC1_12	191.01	77264.8	7846.38	8005.75	437.574	1806132	0.000369615	0.220523	0.0012744	5.26021	23.3739	1.10298	0.100617	2.67351	0.593262	2.8921	0.0427827	1.10298	0.381378	1635.52	99.3138	270.058	5.83169	472.948	21.637
2017-05-08	WC1_13	305.248	90225.5	9262.72	11477.2	2952.95	2085535	0.00216016	0.262793	0.00860021	6.07394	22.8758	1.04404	0.0987113	1.36117	0.594697	1.71545	0.0437142	1.04404	0.608607	1599.92	50.7972	275.814	5.63528	473.863	12.909
2017-05-08	WC1_14	213.24	76055.3	7451.52	9100.07	1102.79	1759846	0.000956017	0.219315	0.00321178	5.1254	22.8785	1.10928	0.0977467	2.47946	0.588817	2.71629	0.0437091	1.10928	0.408382	1581.57	92.7522	275.783	5.98661	470.112	20.2398
2017-05-08	WC1_15	bd	66799.9	5192.64	4347.9	268.463	1591056	0.000257422	0.180793	0.000781875	4.63382	23.8725	1.0939	0.0781815	1.51404	0.451349	1.86787	0.0418892	1.0939	0.585642	1151.49	60.1176	264.533	5.66782	378.224	11.7283
2017-05-08	WC1_16	134.558	66990.2	5570.66	5347.15	121.642	1604708	0.000115647	0.184505	0.000354272	4.67357	23.5548	1.07914	0.0834561	1.18511	0.488297	1.60282	0.0424541	1.07914	0.673277	1279.91	46.1932	268.027	5.66368	403.75	10.6234
2017-05-08	WC1_17	128.918	68935.4	4808.54	3203.99	280.47	1695886	0.000252312	0.182231	0.000816845	4.93912	24.3899	1.04163	0.0694636	1.17166	0.392512	1.56773	0.0410005	1.04163	0.664418	912.539	48.2347	259.032	5.28716	336.203	8.93458
2017-05-08	WC1_18	16.3168	56164.2	3736.71	2006.23	61.9404	1412511	6.69005e-05	0.146611	0.000180396	4.11382	25.0592	1.03512	0.0655634	0.876412	0.360578	1.35631	0.0399054	1.03512	0.76319	792.466	36.7711	252.247	5.11925	312.646	7.27342
2017-05-08	WC1_19	64.9048	81292.5	4808.27	1607	50.0001	2012624	3.79014e-05	0.207713	0.000145621	5.86159	24.5235	1.10059	0.0589352	0.773106	0.331206	1.34499	0.0407773	1.10059	0.81829	564.702	33.6762	257.649	5.55708	290.486	6.77301
2017-05-08	WC1_20	224.968	69965.5	5669.14	4929.64	158.209	1684972	0.000143248	0.190796	0.000460772	4.90734	24.0164	1.06216	0.0811483	1.94371	0.46567	2.21499	0.0416383	1.06216	0.479532	1225.04	76.3584	262.98	5.47179	388.193	14.1917
2017-05-08	WC1_21	130.98	59805.8	3956.58	2273.13	123.81	1458342	0.000129522	0.156388	0.000360585	4.2473	24.1487	1.05609	0.0656557	1.10226	0.374701	1.52653	0.0414101	1.05609	0.69182	795.42	46.2251	261.568	5.4119	323.132	8.41477
2017-05-08	WC1_22	76.0525	66599.4	5195.74	4629.15	75.7577	1609998	7.17876e-05	0.180991	0.000220638	4.68898	24.1138	1.05857	0.0773317	1.05954	0.441976	1.49773	0.0414701	1.05857	0.706784	1129.76	42.2057	261.939	5.43218	371.645	9.28001
2017-05-08	WC1_23	bd	58780.3	4002.19	2366.26	85.9377	1430174	9.16733e-05	0.154288	0.000250286	4.16526	24.1798	1.05534	0.0674205	1.39071	0.384278	1.7458	0.0413569	1.05534	0.604501	850.789	57.81	261.238	5.40141	330.181	9.79447
2017-05-08	WC1_24	32.0369	68086.5	4725.35	3055.62	66.9232	1658355	6.15668e-05	0.179672	0.000194908	4.82982	23.9705	1.04455	0.0687473	0.995945	0.395261	1.44326	0.0417179	1.04455	0.723745	891.167	41.1378	263.473	5.39099	338.205	8.26918
2019-02-25	WC1_01	180.435	64312.6	8581.06	13878.4	196.748	1491378	0.000131923	0.201246	0.000697345	5.28599	23.3733	1.55861	0.131923	0.794913	0.777873	1.74962	0.0427839	1.55861	0.890831	2123.73	27.8464	270.066	8.23939	584.269	15.4279
2019-02-25	WC1_02	210.423	59406.9	6848.59	10039.3	101.971	1443434	7.0645e-05	0.176947	0.000361424	5.11606	24.3646	1.54443	0.11388	0.735016	0.644159	1.71041	0.0410432	1.54443	0.902958	1862.23	26.5426	259.296	7.84557	504.878	13.5181
2019-02-25	WC1_03	448.301	62186.8	6920.61	9462.38	63.1655	1453697	4.34516e-05	0.182223	0.000223882	5.15244	23.7476	1.5323	0.109643	1.0218	0.636308	1.84175	0.0421096	1.5323	0.831984	1793.49	37.2094	265.896	7.97796	500.018	14.4411
2019-02-25	WC1_04	526.77	63117.3	6775.77	9406.09	190.777	1489726	0.000128062	0.183915	0.000676185	5.28014	23.8386	1.53313	0.107056	1.10396	0.618925	1.88923	0.0419488	1.53313	0.811508	1749.9	40.4189	264.901	7.95302	489.173	14.5626
2019-02-25	WC1_05	365.791	67914.7	8257.62	12179.5	135.67	1583229	8.5692e-05	0.20491	0.000480865	5.61154	23.4313	1.54981	0.120321	0.787343	0.707699	1.73834	0.0426779	1.54981	0.891546	1960.98	28.1001	269.41	8.17341	543.379	14.5252
2019-02-25	WC1_06	413.267	63751.2	7590.18	11443.3	193.85	1462053	0.000132588	0.191998	0.000687077	5.18205	23.1593	1.57174	0.121117	1.46719	0.72075	2.15012	0.0431791	1.57174	0.731001	1972.74	52.2915	272.509	8.38225	551.11	18.1262
2019-02-25	WC1_07	493.719	69164.8	9665.39	15825.8	564.576	1595707	0.00035381	0.219531	0.00200107	5.65577	23.1828	1.54894	0.139287	1.005	0.828036	1.84641	0.0431353	1.54894	0.838893	2218.36	34.8405	272.238	8.25272	612.522	16.844
2019-02-25	WC1_08	897.944	78423.5	11514	19621.2	533.315	1726276	0.000308939	0.254094	0.00189026	6.11856	22.2716	1.56393	0.146152	0.690928	0.9044	1.70976	0.0449002	1.56393	0.914711	2301.39	23.7403	283.136	8.65862	654.076	16.3566
2019-02-25	WC1_09	626.573	80568	12249.5	21057.6	509.581	1755994	0.000290195	0.264105	0.00180614	6.22389	21.98	1.55354	0.150466	0.753689	0.94344	1.72671	0.0454958	1.55354	0.89971	2351.22	25.7614	286.809	8.71016	674.681	16.8814
2019-02-25	WC1_10	901.697	75368.9	11674.2	20634.8	670.628	1626474	0.00041232	0.249732	0.00237695	5.76482	21.8916	1.57742	0.153153	0.883636	0.96417	1.80806	0.0456797	1.57742	0.87244	2381.43	30.1085	287.943	8.87812	685.454	17.8657
2019-02-25	WC1_11	1006.63	85519	14992.8	27509.8	1147.39	1813064	0.000632845	0.296914	0.00406677	6.42616	21.2918	1.55036	0.173304	0.754107	1.12176	1.72403	0.0469664	1.55036	0.899263	2589.81	25.1646	295.87	8.96051	763.82	18.3434
2019-02-25	WC1_12	434.567	74035.9	11659.5	20287.4	1715.12	1605679	0.00106816	0.245801	0.006079	5.69112	22.0245	1.53532	0.156676	0.703586	0.980399	1.68886	0.045404	1.53532	0.909087	2420.1	23.8785	286.243	8.59146	693.81	16.8382
2019-02-25	WC1_13	544.231	79613	12554.2	22153	1635.34	1736357	0.000941822	0.265137	0.00579624	6.15429	22.0929	1.54859	0.154205	1.0176	0.961947	1.85301	0.0452635	1.54859	0.835715	2393.08	34.6315	285.376	8.64001	684.305	18.2846
2019-02-25	WC1_14	667.194	73334.9	12369.2	22688.2	580.33	1568071	0.000370091	0.251389	0.0020569	5.55782	21.6304	1.55634	0.167541	0.779683	1.06749	1.74072	0.0462312	1.55634	0.894079	2533.23	26.1624	291.342	8.86058	737.508	18.0898
2019-02-25	WC1_15	638.178	72615.9	11351.4	19667.1	733.066	1555982	0.000471128	0.240354	0.00259825	5.51497	21.627	1.55539	0.154705	0.871029	0.985857	1.78267	0.0462384	1.55539	0.872503	2398.6	29.6264	291.386	8.85647	696.604	17.8148
2019-02-25	WC1_16	689.693	58073.1	8484.41	14116.1	200.49	1235266	0.000162305	0.187102	0.000710611	4.37824	21.3979	1.57988	0.143124	0.809057	0.921821	1.77499	0.0467335	1.57988	0.890077	2265.35	27.9061	294.436	9.08779	663.323	17.1442
2019-02-25	WC1_17	386.928	57613.2	7947.2	11438.6	179.832	1245156	0.000144425	0.17858	0.000637391	4.41329	22.756	2.61161	0.123037	1.91261	0.745156	3.23707	0.0439445	2.61161	0.806784	2000.73	67.9449	277.236	14.1582	565.41	27.6879
2019-02-25	WC1_18	374.412	65204.7	9246.44	15199.4	259.581	1396196	0.00018592	0.207922	0.000920051	4.94863	21.8307	1.56145	0.139659	0.804455	0.881677	1.7565	0.0458071	1.56145	0.888958	2222.99	27.8743	288.728	8.81175	641.888	16.5776
2019-02-25	WC1_19	250.155	57691.3	7671.44	12298.5	123.975	1220936	0.000101541	0.180116	0.000439413	4.32744	21.705	1.62551	0.133209	0.900777	0.845825	1.85841	0.0460723	1.62551	0.874678	2140.7	31.4953	290.362	9.22368	622.355	17.1482
2019-02-25	WC1_20	384.339	62491	7958.85	12358.1	160.67	1404092	0.00011443	0.192052	0.000569474	4.97662	22.561	1.56206	0.12422	0.846708	0.758817	1.77678	0.0443242	1.56206	0.879152	2017.7	30.0201	279.581	8.54209	573.327	15.4491
2019-02-25	WC1_21	528.501	56803.7	8866.4	15726.6	436.364	1182291	0.000369083	0.18878	0.00154663	4.19047	21.1555	1.55706	0.154873	0.910266	1.00893	1.80361	0.0472691	1.55706	0.863301	2400.44	30.9551	297.733	9.05458	708.331	18.2303
2019-02-25	WC1_22	110.423	53522.6	6393.47	9350.99	284.615	1213322	0.000234575	0.160648	0.00100878	4.30046	22.9191	1.54061	0.118203	1.02064	0.710784	1.84802	0.0436318	1.54061	0.833653	1929.23	36.5629	275.306	8.29883	545.212	15.4738
2019-02-25	WC1_23	128.792	65112.7	5540.98	5673.01	706.452	1526774	0.000462709	0.177021	0.00250392	5.41145	23.6266	1.55741	0.0842179	1.06627	0.491256	1.88744	0.0423251	1.55741	0.825142	1297.59	41.4571	267.229	8.14839	405.766	12.5488
2019-02-25	WC1_24	136.391	58252.3	5906.34	7261.59	527.612	1391520	0.000379162	0.165641	0.00187005	4.93206	24.1811	1.56272	0.0986967	1.19562	0.562512	1.96764	0.0413546	1.56272	0.79421	1599.64	44.6208	261.224	7.99621	453.16	14.2842
2019-02-25	WC1_25	404.699	60556.9	6507.67	8938.52	422.059	1361307	0.000310039	0.17627	0.00149593	4.82497	22.6214	1.5815	0.10754	1.09992	0.655175	1.92639	0.0442059	1.5815	0.820968	1758.15	40.2297	278.851	8.62624	511.658	15.3683
2019-02-25	WC1_26	88.2244	60485.2	6089.27	7818.42	350	1381483	0.000253351	0.172536	0.00124053	4.89648	22.895	1.5506	0.0991277	1.0939	0.596707	1.89762	0.0436777	1.5506	0.817128	1607.77	40.7814	275.589	8.36103	475.142	14.3003
2019-02-25	WC1_27	160.435	59353.1	6867.91	9746.03	483.582	1414203	0.000341947	0.176187	0.00171399	5.01245	24.331	1.73083	0.113852	1.35735	0.644891	2.19958	0.0410998	1.73083	0.786891	1861.79	49.0187	259.647	8.80348	505.33	17.3633
2019-02-25	WC1_28	bd	37631.3	3364.36	3483.56	94.7761	967491	9.79607e-05	0.103158	0.000335921	3.42914	25.7522	1.70164	0.0857435	2.05412	0.458874	2.6674	0.0388317	1.70164	0.637942	1332.41	79.4758	245.587	8.19562	383.474	16.8968
2019-02-25	WC1_29	1388.09	95809.7	22811.9	50339.6	1150.78	1844095	0.000624036	0.391863	0.00407879	6.53615	19.5566	3.82109	0.20331	5.32054	1.43275	6.55048	0.0511337	3.82109	0.583329	2852.95	173.257	321.478	23.921	902.7	75.4687
2019-02-25	WC1_30	770.308	91746.3	14343.3	25283	4433.58	1970017	0.00225053	0.304686	0.0157142	6.98246	21.676	1.55374	0.155929	1.17236	0.99141	1.94642	0.0461339	1.55374	0.798257	2411.99	39.821	290.742	8.82802	699.439	19.4901
2019-02-25	WC1_31	353.51	70105.9	9445.8	15099.5	1298.51	1571858	0.000826097	0.21952	0.00460238	5.57124	22.6536	1.55999	0.13677	1.80626	0.832072	2.38666	0.0441431	1.55999	0.65363	2186.7	62.8349	278.463	8.49741	614.761	21.7772
2019-02-25	WC1_32	612.052	62519.3	8709.97	15104.4	8310.45	1412863	0.00588199	0.20023	0.0294553	5.0077	22.8414	1.59478	0.141787	1.39522	0.855499	2.11895	0.0437801	1.59478	0.752627	2249.15	48.2077	276.222	8.61838	627.663	19.6485
2019-02-25	WC1_33	304.105	50288	6970.78	11032.5	252.378	1126451	0.000224047	0.158385	0.000894521	3.99256	22.6912	1.54556	0.134798	1.05661	0.818713	1.87221	0.0440699	1.54556	0.825525	2161.4	36.8593	278.011	8.40549	607.33	16.9726
2019-02-25	WC1_34	155.972	34408	3817.3	5574.72	70.2434	779982	9.00576e-05	0.101583	0.000248968	2.76454	23.0665	1.55512	0.110156	1.29493	0.65816	2.02367	0.0433529	1.55512	0.768465	1801.98	47.1065	273.582	8.32567	513.488	16.1823
2019-02-25	WC1_35	46.4769	52930.5	6245.24	8921.31	190.393	1204084	0.000158122	0.157934	0.000674821	4.26772	23.1072	1.56761	0.115404	1.05464	0.688304	1.88936	0.0432765	1.56761	0.829706	1886.2	37.9751	273.111	8.37833	531.781	15.5231
2019-02-25	WC1_36	576.531	61233.5	10022.5	18231	509.642	1293592	0.000393974	0.207543	0.00180636	4.58496	21.3458	1.57617	0.161853	0.708009	1.045	1.72789	0.0468477	1.57617	0.912196	2475.11	23.8951	295.139	9.08763	726.401	17.7743
2019-02-25	WC1_37	405.442	51675.7	7690.1	13129.3	144.045	1091507	0.000131969	0.168134	0.000510548	3.8687	21.4636	1.62304	0.148751	0.794024	0.955131	1.80686	0.0465906	1.62304	0.898267	2331.61	27.1958	293.556	9.30863	680.771	17.7691
2019-02-25	WC1_38	605.66	63911.8	11223.5	21310.9	523.228	1270238	0.000411914	0.223683	0.00185451	4.50219	20.1974	1.59797	0.174942	0.691403	1.19372	1.74113	0.0495113	1.59797	0.917775	2605.49	23.0372	311.52	9.71193	797.686	19.0603
2019-02-25	WC1_39	421.404	56081	7532.76	12212	237.629	1286730	0.000184677	0.175859	0.000842245	4.56064	23.0889	1.54903	0.132383	1.06913	0.790197	1.88216	0.0433109	1.54903	0.823005	2129.81	37.427	273.323	8.28535	591.283	16.7328
2019-02-25	WC1_40	254.965	52770	7220.8	11737	187.629	1175894	0.000159563	0.166355	0.000665026	4.1678	22.2655	1.54703	0.134171	0.783878	0.830483	1.73429	0.0449125	1.54703	0.892024	2153.26	27.3698	283.211	8.56731	613.88	15.8545
2019-02-25	WC1_41	182.885	64344.6	8238.65	13134	300.094	1470767	0.000204039	0.1988	0.00106364	5.21294	23.0495	1.5352	0.127429	0.691397	0.761925	1.68371	0.0433849	1.5352	0.911798	2062.8	24.3872	273.78	8.2249	575.12	14.6794
2019-02-25	WC1_42	573.101	64036.2	8948.62	14690.8	378.579	1425855	0.00026551	0.203342	0.00134182	5.05375	22.5676	1.54803	0.138957	0.670204	0.848595	1.68688	0.0443114	1.54803	0.917687	2214.25	23.2446	279.502	8.46305	623.878	15.6049
2019-02-25	WC1_43	386.475	63473.2	8431.58	13437.8	349.348	1458143	0.000239584	0.197931	0.00123822	5.16819	23.1694	1.60319	0.13094	0.85719	0.778867	1.81797	0.0431603	1.60319	0.881861	2110.61	30.0721	272.392	8.54634	584.837	16.0373
2019-02-25	WC1_44	305.062	51066.3	6431.34	9970.33	126.213	1171670	0.000107721	0.156475	0.000447347	4.15283	23.1429	1.56992	0.125249	0.699473	0.745869	1.7187	0.0432098	1.56992	0.913438	2032.32	24.7582	272.698	8.37827	565.824	14.8027
2019-02-25	WC1_45	393.735	44006.5	6010.75	9652.12	154.688	987136	0.000156703	0.138388	0.000548269	3.49877	22.9382	1.56805	0.13164	0.852423	0.790926	1.78477	0.0435954	1.56805	0.878572	2119.96	29.8736	275.08	8.43978	591.697	15.8818
2019-02-25	WC1_46	306.008	53207.7	7543.21	12167.2	444.03	1224418	0.000362646	0.169116	0.0015738	4.33979	23.2808	1.54602	0.140184	1.05167	0.829863	1.86981	0.0429539	1.54602	0.826832	2229.48	36.4148	271.117	8.20398	613.536	17.0761
2019-02-25	WC1_47	521.892	54938.7	7936.27	13792.6	221.875	1235735	0.000179549	0.177812	0.000786406	4.3799	22.8258	1.56261	0.140841	1.15419	0.850376	1.94265	0.0438102	1.56261	0.804367	2237.58	39.9296	276.407	8.45019	624.856	17.9704
2019-02-25	WC1_48	202.674	54656.3	6439.85	9535.94	187.121	1241083	0.000150773	0.163814	0.000663226	4.39885	23.0448	1.58407	0.117501	1.11615	0.702709	1.9378	0.0433938	1.58407	0.817458	1918.56	40.0351	273.835	8.48821	540.408	16.1122
2019-02-25	WC1_49	452.834	49819.2	6944.57	11095	289.394	1112169	0.000260207	0.157382	0.00102572	3.94193	22.6292	1.54363	0.137019	0.799443	0.834485	1.73837	0.0441907	1.54363	0.88798	2189.86	27.8009	278.757	8.41705	616.098	15.9329
2019-02-25	WC1_50	471.462	53646.4	7053.6	11210.3	191.045	1168495	0.000163496	0.166778	0.000677133	4.14157	22.1627	1.54915	0.129474	0.745311	0.805133	1.71911	0.0451209	1.54915	0.901133	2090.84	26.2054	284.497	8.61712	599.72	15.453
2019-02-25	WC1_51	bd	46792.2	5453.25	6852.78	156.716	1030448	0.000152086	0.137064	0.00055546	3.65229	22.316	1.63422	0.112026	2.03981	0.691845	2.61372	0.0448108	1.63422	0.625248	1832.54	73.9267	282.584	9.03028	533.908	21.4766
2019-02-25	WC1_52	135.286	53450.6	4896.87	5392.39	310.294	1218326	0.000254689	0.147829	0.0010998	4.31819	23.2338	1.5633	0.091393	1.2895	0.542124	2.0265	0.0430408	1.5633	0.771427	1454.8	49.0584	271.654	8.31169	439.824	14.3652
2019-02-25	WC1_53	402.085	53504.5	6758.53	10299.6	147.761	1173213	0.000125946	0.163652	0.00052372	4.1583	22.1844	1.55162	0.124248	0.807554	0.771877	1.74919	0.0450766	1.55162	0.88705	2018.11	28.6305	284.224	8.62274	580.839	15.3576
2019-02-25	WC1_54	278.126	56593.6	5267.07	6263.99	364.615	1297225	0.000281073	0.157998	0.00129233	4.59784	23.0859	1.5734	0.0925158	1.16538	0.5523	1.95798	0.0433165	1.5734	0.803582	1478	44.1978	273.357	8.41668	446.502	14.0495
2019-02-25	WC1_55	86.3661	49621.7	6351.73	10017.8	262.879	1085535	0.000242165	0.15305	0.000931739	3.84753	22.1252	1.61332	0.129427	1.13368	0.8062	1.97181	0.0451973	1.61332	0.818194	2090.2	39.8635	284.968	8.98836	600.32	17.7177
2019-02-25	WC1_56	307.393	56335.2	7542.5	11467.2	366.393	1229033	0.000298115	0.174744	0.00129863	4.35614	22.3227	1.54522	0.134379	1.89204	0.829642	2.44285	0.0447975	1.54522	0.632549	2155.97	66.0423	282.502	8.53637	613.414	22.2492
2019-02-25	WC1_57	622.923	68501	8826.52	13713.5	350	1547469	0.000226176	0.211147	0.00124053	5.4848	22.7897	1.52938	0.12699	0.831816	0.767955	1.74095	0.0438794	1.52938	0.878472	2056.71	29.3604	276.835	8.28314	578.589	15.2422
2019-02-25	WC1_58	303.635	72944.1	10018.5	16434.1	310.656	1629515	0.000190643	0.230526	0.00110108	5.7756	22.7102	1.54994	0.137248	0.635272	0.832896	1.67508	0.0440332	1.54994	0.925294	2192.76	22.0848	277.784	8.42256	615.218	15.3413
2019-02-25	WC1_59	920.291	84629.1	11851.6	19438.4	725	1905149	0.000380548	0.268846	0.00256967	6.75255	22.7725	1.52233	0.1385	0.82558	0.838193	1.73178	0.0439126	1.52233	0.879053	2208.53	28.6513	277.04	8.25093	618.148	15.911
2019-02-26	WC1_01	959.138	79619.7	10866.4	17450.3	347.414	1758191	0.000197597	0.250332	0.00123136	6.23167	22.2326	1.5236	0.134838	0.617625	0.835849	1.64403	0.044979	1.5236	0.92675	2161.92	21.5443	283.622	8.44962	616.852	15.0879
2019-02-26	WC1_02	938.452	82222.5	11552.3	18867.5	376.667	1807982	0.000208335	0.261246	0.00133504	6.40815	22.297	1.52995	0.138179	0.706055	0.854087	1.68501	0.0448491	1.52995	0.907976	2204.51	24.514	282.82	8.46133	626.89	15.6417
2019-02-26	WC1_03	910.478	81373.7	9910.65	15204.6	622.414	1805324	0.000344766	0.246975	0.00220606	6.39873	22.4129	1.53927	0.122718	0.892142	0.754596	1.77912	0.0446171	1.53927	0.865186	1996.11	31.7101	281.389	8.47076	570.887	15.4206
2019-02-26	WC1_04	791.896	81416.5	11423.3	18982.2	636.207	1773068	0.000358817	0.259343	0.00225495	6.2844	21.9927	1.54396	0.140066	0.657967	0.877728	1.67831	0.0454696	1.54396	0.919948	2228.03	22.7861	286.647	8.65171	639.755	15.8079
2019-02-26	WC1_05	742.133	71189.1	8988.41	13924.7	410	1552523	0.000264086	0.218247	0.00145319	5.50271	22.1078	1.56855	0.12407	0.948912	0.773443	1.83324	0.0452329	1.56855	0.855614	2015.57	33.652	285.188	8.74566	581.736	16.108
2019-02-26	WC1_06	686.302	48878.8	7287.43	12309.8	443.333	1064020	0.000416659	0.158813	0.00157134	3.77128	21.7821	1.66515	0.148084	1.90225	0.936948	2.5281	0.0459093	1.66515	0.658658	2323.92	65.2058	289.358	9.41652	671.283	24.5354
2019-02-26	WC1_07	428.044	79261.3	9801.98	14614.6	596.61	1722735	0.000346316	0.240455	0.00211461	6.106	21.9028	1.59448	0.121489	1.14924	0.764439	1.96548	0.0456563	1.59448	0.811242	1978.21	40.9335	287.798	8.96968	576.568	17.1472
2019-02-26	WC1_08	955.14	70567.5	9183.3	15025.5	422.881	1546485	0.000273447	0.21981	0.00149885	5.48131	22.2102	1.55569	0.127289	0.713877	0.789848	1.71166	0.0450244	1.55569	0.908876	2060.86	25.1857	283.902	8.63577	591.085	15.2246
2019-02-26	WC1_09	687.08	72571.8	10154.9	16610.5	1747.5	1594891	0.00109569	0.204123	0.00577038	5.26646	21.9759	1.21249	0.137022	1.05047	0.859311	1.60425	0.0455043	1.21249	0.7558	2189.9	36.5301	286.861	6.80023	629.746	14.9461
2019-02-26	WC1_10	1149.76	73888.2	12764.8	22529.3	1763.33	1545099	0.00114124	0.224353	0.00582266	5.10204	20.8775	1.22014	0.168982	1.1171	1.11549	1.65429	0.0478984	1.22014	0.737564	2547.58	37.4316	301.606	7.18652	760.814	17.5616
2019-02-26	WC1_11	993.582	96341.2	15556.3	27753.8	4096.61	2137302	0.00191672	0.286962	0.0135273	7.05754	22.2477	1.43999	0.155443	3.02756	0.962928	3.35256	0.0449485	1.43999	0.429518	2406.69	102.891	283.434	7.98102	684.812	32.8609
2019-02-26	WC1_12	1036.49	79604.9	13883.7	21331.7	2083.07	1611761	0.00129242	0.235938	0.00687844	5.32216	20.6601	1.48297	0.17684	3.80018	1.17966	4.07929	0.0484026	1.48297	0.363536	2623.46	126.402	304.707	8.8211	791.153	43.8728
2019-02-26	WC1_13	681.788	63773.7	8991.99	14830.7	572.414	1421961	0.000402552	0.179997	0.00189016	4.69543	22.2966	1.18443	0.139706	0.963667	0.863541	1.52693	0.0448499	1.18443	0.775691	2223.57	33.3889	282.825	6.55154	632.054	14.2682
2019-02-26	WC1_14	998.875	83026.6	14085.1	23904	1166.95	1791513	0.000651376	0.248669	0.00385336	5.91572	21.2812	1.1708	0.163925	1.28805	1.06158	1.74065	0.0469898	1.1708	0.672623	2496.55	43.3783	296.014	6.77117	734.604	18.041
2019-02-26	WC1_15	346.724	49074.4	6868.08	10776.7	154.167	1103073	0.000139761	0.137098	0.000509071	3.64243	22.5302	1.1682	0.133013	0.939719	0.813643	1.49925	0.0443848	1.1682	0.779187	2138.12	32.8663	279.955	6.3977	604.496	13.5679
2019-02-26	WC1_16	532.303	54808.2	7913.77	12750.6	298.361	1214125	0.000245741	0.155085	0.00098521	4.00914	22.0812	1.1597	0.138477	0.91607	0.86429	1.47787	0.0452874	1.1597	0.784714	2208.24	31.7927	285.524	6.47469	632.462	13.8192
2019-05-08	WC1_01	553.553	97513.7	12016.7	18856.3	905.368	2039059	0.000444012	0.170409	0.00188595	4.24751	22.2906	1.34972	0.122991	1.02639	0.760429	1.69565	0.044862	1.34972	0.795993	2000.07	36.4649	282.9	7.46726	574.258	14.7664
2019-05-08	WC1_02	476.041	82217.6	10888.6	17574.2	409.27	1708757	0.000239513	0.146907	0.000852539	3.55947	21.9349	1.27645	0.131419	0.970213	0.825707	1.60332	0.0455894	1.27645	0.79613	2117.01	34.0129	287.386	7.17157	611.228	14.62
2019-05-08	WC1_03	228.136	115620	13179.1	18816.1	2733.02	2509410	0.00108911	0.195931	0.00569308	5.22728	22.6668	1.29457	0.111259	1.22281	0.676476	1.78078	0.0441175	1.29457	0.72697	1820.09	44.3841	278.305	7.04853	524.642	14.4885
2019-05-08	WC1_04	313.906	80563.3	10726.1	17231.3	344.007	1696843	0.000202733	0.14404	0.000716591	3.53465	21.9854	1.28835	0.131928	0.611422	0.827006	1.42608	0.0454847	1.28835	0.903426	2123.79	21.4184	286.741	7.22251	611.95	13.0251
2019-05-08	WC1_05	215.345	93743.7	8900.14	10913.8	635.52	2108246	0.000301445	0.150726	0.00132383	4.39163	23.5752	1.27407	0.0944733	2.18476	0.552281	2.52911	0.0424175	1.27407	0.503761	1517.59	82.4206	267.8	6.68065	446.49	18.1109
2019-05-08	WC1_06	769.594	187331	20880.9	31043.5	8075.08	4337872	0.00186153	0.317566	0.016821	9.0361	24.2175	1.23725	0.111259	1.66433	0.633158	2.07383	0.0412925	1.23725	0.5966	1820.08	60.4102	260.84	6.32253	498.061	16.1975
2019-05-08	WC1_07	825.865	159572	21657.6	36184.3	7665.94	3421537	0.0022405	0.288575	0.0159687	7.12731	22.4138	1.29504	0.137987	1.09024	0.848458	1.69285	0.0446155	1.29504	0.765006	2202.1	37.8626	281.378	7.12723	623.802	15.6584
2019-05-08	WC1_08	752.445	140194	19348	31637	5541.58	2968534	0.00186677	0.253754	0.0115435	6.18367	21.9571	1.29894	0.135569	0.915767	0.850927	1.5893	0.0455434	1.29894	0.817304	2171.35	31.911	287.102	7.29082	625.158	14.7304
2019-05-08	WC1_09	1112.44	158988	23259.2	39340	4068.02	3252852	0.0012506	0.294114	0.00847398	6.77593	21.4753	1.21293	0.145267	1.18803	0.932255	1.69782	0.0465652	1.21293	0.714402	2290.94	40.8659	293.399	6.95416	668.821	16.5002
2019-05-08	WC1_10	1263.83	126582	23098.2	46138.9	4530.98	2471313	0.00183343	0.259913	0.00943836	5.14792	19.5168	2.72034	0.183286	2.41025	1.29427	3.6345	0.0512379	2.72034	0.748478	2682.83	79.7192	322.117	17.0721	843.191	40.8065
2019-05-08	WC1_11	295.408	85506.6	9356.39	13616.3	1505.49	1942812	0.000774904	0.143986	0.00313605	4.04702	23.3796	1.33667	0.10545	0.854224	0.621607	1.58631	0.0427723	1.33667	0.842628	1722.18	31.3842	269.994	7.06493	490.854	12.2742
2019-05-08	WC1_12	151.537	47886.2	5510.25	8058.8	151.742	1037861	0.000146207	0.0815701	0.00031609	2.16194	22.604	1.26305	0.115183	0.833154	0.702276	1.51309	0.0442399	1.26305	0.834748	1882.75	30.0124	279.06	6.89523	540.15	12.5981
2019-05-08	WC1_13	444.253	68358.6	8785.02	13721.3	579.798	1405282	0.000412585	0.120606	0.00120776	2.9273	22.1315	1.39935	0.126036	0.992199	0.784858	1.71541	0.0451845	1.39935	0.815752	2043.4	35.0748	284.889	7.79489	588.251	15.2041
2019-05-08	WC1_14	519.591	108028	14092	22860	4817.53	2328485	0.00206896	0.192434	0.0100353	4.8504	22.3942	1.28325	0.131769	1.3126	0.810933	1.83566	0.0446545	1.28325	0.699066	2121.68	45.9921	281.619	7.06828	602.977	16.5573
2019-05-08	WC1_15	706.504	131543	18361.6	30512.7	4807.99	2775639	0.00173221	0.23947	0.0100154	5.78186	22.0716	1.22766	0.142157	1.52352	0.88765	1.9566	0.0453072	1.22766	0.627447	2253.65	52.6156	285.646	6.85677	645.106	18.5147
2019-05-10	WC1_01	371.684	103136	9320.13	10015.9	281.607	2350338	0.000119816	0.237106	0.000722468	6.02983	23.63	1.26031	0.0897208	1.66358	0.523282	2.08708	0.0423191	1.26031	0.603864	1419.59	63.5941	267.192	6.59386	427.341	14.4563
2019-05-10	WC1_02	225.502	104816	8944.36	8866.93	294.59	2419325	0.000121765	0.237407	0.000755777	6.20682	24.0728	1.23982	0.0846093	1.35304	0.484393	1.83518	0.0415407	1.23982	0.675586	1306.6	52.5402	262.376	6.3722	401.082	12.0892
2019-05-10	WC1_03	205.813	81269.7	5212.13	2801.68	72.6923	2029278	3.58218e-05	0.172853	0.000186493	5.20615	25.8171	1.34569	0.0636226	1.75175	0.339633	2.20896	0.038734	1.34569	0.609197	729.11	74.253	244.981	6.46643	296.894	11.3097	outlier
2019-05-10	WC1_04	203.105	66273.8	4319.12	2520.68	50.7127	1702518	2.97869e-05	0.141548	0.000130104	4.36784	26.3525	1.69184	0.0678359	2.03601	0.354767	2.6472	0.037947	1.69184	0.639106	863.546	84.4638	240.095	7.96969	308.3	13.9808	outlier
2019-05-10	WC1_05	113.547	48258.9	2899.32	954.557	56.984	1174748	4.85074e-05	0.100891	0.000146193	3.01384	25.1646	1.24468	0.0588585	0.853737	0.322348	1.50934	0.0397384	1.24468	0.824654	561.865	37.2064	251.211	6.13036	283.707	7.44445
2019-05-10	WC1_06	211.194	90928.1	7158.38	6753.7	278.692	2095491	0.000132996	0.202971	0.00071499	5.37602	24.2956	1.28549	0.0785324	1.35057	0.445479	1.86455	0.0411597	1.28549	0.689439	1160.38	53.5572	260.017	6.54864	374.108	11.6028
2019-05-10	WC1_07	66.0242	43057.2	2604.1	831.513	10.4766	1039801	1.00756e-05	0.0900103	2.6878e-05	2.66763	25.1942	1.227	0.0594563	0.930289	0.32524	1.53979	0.0396917	1.227	0.796859	583.845	40.3925	250.922	6.03647	285.925	7.64531
2019-05-10	WC1_08	140.846	87025.7	6330.26	4585.19	159.067	2066126	7.69882e-05	0.189614	0.00040809	5.30068	24.668	1.26098	0.0735386	1.78547	0.410854	2.18586	0.0405383	1.26098	0.576881	1028.83	72.2032	256.169	6.3307	349.49	12.8451
2019-05-10	WC1_09	266.374	91273	7005.01	6497.41	151.733	2090494	7.25824e-05	0.202846	0.000389274	5.3632	23.8866	1.32507	0.0754714	2.64481	0.435445	2.95818	0.0418644	1.32507	0.447935	1081.08	106.117	264.379	6.86105	367.036	18.0619
2019-05-10	WC1_10	233.746	96003.7	8202.73	8453.54	275.692	2157242	0.000127799	0.21811	0.000707293	5.53444	23.2796	1.31359	0.0836364	2.24736	0.495137	2.6031	0.0429561	1.31359	0.504625	1284.11	87.5454	271.13	6.97159	408.405	17.3571
2019-05-10	WC1_11	96.2552	80539.9	6027.61	4971.1	232.345	1830550	0.000126927	0.177219	0.000596086	4.69631	23.6174	1.24814	0.0752035	1.64633	0.438846	2.06597	0.0423417	1.24814	0.604142	1073.94	66.1258	267.332	6.53357	369.439	12.7163
2019-05-10	WC1_11	295.408	85506.6	9356.39	13616.3	1505.49	1942812	0.000774904	0.210016	0.00386237	4.98432	23.3172	1.33667	0.105311	0.854224	0.622451	1.58631	0.0428869	1.33667	0.842628	1719.76	31.3938	270.702	7.08308	491.382	12.2844
2019-05-10	WC1_12	276.437	92563.5	7538.68	6234.08	203.774	2075286	9.81908e-05	0.205868	0.000522786	5.32418	23.2993	1.26997	0.0764306	1.41782	0.452096	1.90343	0.0429197	1.26997	0.6672	1106.37	56.6734	270.905	6.73474	378.746	11.9639
2019-05-10	WC1_12	151.537	47886.2	5510.25	8058.8	151.742	1037861	0.000146207	0.118978	0.000389298	2.66265	22.5436	1.26305	0.115031	0.833154	0.70323	1.51309	0.0443584	1.26305	0.834748	1880.37	30.0209	279.792	6.91292	540.718	12.6081
2019-05-10	WC1_13	558.708	120716	12275.4	16117.5	660.109	2559365	0.000257919	0.288676	0.00169352	6.5661	23.2523	1.36538	0.109512	5.87556	0.649083	6.03213	0.0430065	1.36538	0.226352	1791.3	214.02	271.442	7.25447	507.914	47.1059
2019-05-10	WC1_13	444.253	68358.6	8785.02	13721.3	579.798	1405282	0.000412585	0.175915	0.00148748	3.60528	22.0723	1.39935	0.12587	0.992199	0.785924	1.71541	0.0453056	1.39935	0.815752	2041.07	35.0841	285.636	7.81486	588.857	15.2156
2019-05-10	WC1_14	519.591	108028	14092	22860	4817.53	2328485	0.00206896	0.280683	0.0123595	5.97377	22.3343	1.28325	0.131596	1.3126	0.812034	1.83566	0.0447741	1.28325	0.699066	2119.37	46.0039	282.358	7.0864	603.594	16.5696
2019-05-10	WC1_15	706.504	131543	18361.6	30512.7	4807.99	2775639	0.00173221	0.349289	0.012335	7.12095	22.0126	1.22766	0.14197	1.52352	0.888856	1.9566	0.0454286	1.22766	0.627447	2251.37	52.6285	286.394	6.87434	645.754	18.5279
2017-05-08	DuffBrown_01	1161.5	89217.8	23228.1	52729.8	6288.81	6174126	0.00155396	0.391176	0.0183156	17.9816	68.3383	1.10833	0.261673	0.666557	0.527716	1.29333	0.0146331	1.10833	0.856961	3256.81	20.9853	93.6474	2.06051	430.293	9.03219
2017-05-08	DuffBrown_02	1470.37	92722.2	29157	68444.1	6691.17	5642547	0.00180915	0.450732	0.0194875	16.4334	60.2291	1.17147	0.311544	0.921512	0.712885	1.49048	0.0166033	1.17147	0.78597	3528.59	28.4281	106.153	2.46626	546.458	12.5198
2017-05-08	DuffBrown_03	1294.41	91371.9	24309.2	55154.3	8940.44	6243801	0.00218453	0.404579	0.0260383	18.1845	67.6039	1.0681	0.265214	0.624586	0.540668	1.23732	0.0147921	1.0681	0.863242	3277.95	19.6315	94.6573	2.00699	438.865	8.77978
2017-05-08	DuffBrown_04	1060.64	84217.8	22928.4	52247.2	7756.59	5680900	0.00208306	0.377482	0.0225904	16.5451	67.1219	1.05218	0.273487	0.580199	0.561536	1.20155	0.0148983	1.05218	0.875688	3326.13	18.1688	95.332	1.99106	452.526	8.73688
2017-05-08	DuffBrown_05	1253.88	83203.3	26603	62623	7447.82	4986531	0.00227865	0.408354	0.0216911	14.5228	59.5973	1.13561	0.317892	0.744573	0.735123	1.35794	0.0167793	1.13561	0.836274	3559.67	22.9189	107.269	2.4157	559.555	11.6167
2017-05-08	DuffBrown_06	1284.48	80818.1	25270.9	59621.8	8448.82	4970535	0.00259323	0.392443	0.0246065	14.4763	60.9671	1.38548	0.310167	1.52481	0.701142	2.06025	0.0164023	1.38548	0.672485	3521.75	47.0626	104.878	2.88198	539.473	17.0995
2017-05-08	DuffBrown_07	1016.18	82103.6	22667.1	51833.2	7487.86	5551081	0.00205792	0.370876	0.0218078	16.167	67.194	1.27958	0.275528	1.31269	0.56512	1.83316	0.0148823	1.27958	0.698018	3337.77	41.0702	95.2304	2.41873	454.853	13.3535
2017-05-08	DuffBrown_08	1560.17	83871.8	28765.5	68640.9	8016.64	4841086	0.00252637	0.429311	0.0233478	14.0992	57.1725	1.432	0.339366	1.04706	0.818065	1.77397	0.0174909	1.432	0.807228	3659.92	32.0058	111.779	3.17297	606.968	16.082
2017-05-08	DuffBrown_09	1298.88	84243.5	25125.4	58687.6	9721.53	5259846	0.00281974	0.397998	0.0283131	15.3189	61.7775	1.33974	0.300545	1.16031	0.670479	1.77235	0.0161871	1.33974	0.755913	3473.03	35.9387	103.513	2.75089	521.003	14.3444
2017-05-08	DuffBrown_10	1309.72	89168.3	24502.6	56123.8	15612.6	5852788	0.00406967	0.402115	0.0454703	17.0457	65.3264	1.0771	0.274839	0.557099	0.579824	1.21264	0.0153078	1.0771	0.888225	3333.85	17.4352	97.9325	2.09338	464.348	8.99818
2017-05-08	DuffBrown_11	1351.03	78796.1	24943.8	58875.1	9146.86	4969934	0.00280782	0.385112	0.0266394	14.4745	61.5974	1.41792	0.31343	1.27612	0.701269	1.90761	0.0162345	1.41792	0.743295	3537.89	39.3415	103.814	2.91974	539.549	15.8441
2017-05-08	DuffBrown_12	1120.85	83754.7	24143.6	55898.9	7515.68	5573663	0.0020572	0.387911	0.0218888	16.2328	65.3165	1.20786	0.290576	1.19203	0.613117	1.69702	0.0153101	1.20786	0.711756	3420.7	37.0635	97.9471	2.34782	485.524	13.0148
2017-05-08	DuffBrown_13	1237.09	86140.3	23108.5	52767.2	11916.9	5868513	0.00309802	0.383693	0.034707	17.0915	68.1378	1.12245	0.269883	0.7194	0.545875	1.3332	0.0146761	1.12245	0.841919	3305.34	22.5638	93.9209	2.0928	442.291	9.51564
2017-05-08	DuffBrown_14	1214.21	81545.5	23042.9	52880.9	11885	5357717	0.00338429	0.372925	0.0346141	15.6039	65.5357	1.1213	0.281058	0.682241	0.59105	1.31255	0.0152589	1.1213	0.854297	3368.82	21.2951	97.622	2.17242	471.538	9.85385
2019-02-25	DuffBrown_01	791.418	79275.2	19946.5	45460.1	4597.85	5245298	0.000876567	0.335554	0.0162965	18.5913	66.5668	1.55674	0.24826	0.739362	0.51399	1.7234	0.0150225	1.55674	0.903298	3173.71	23.4313	96.121	2.96983	421.129	11.8127
2019-02-25	DuffBrown_02	1026.25	70444.9	17775.1	40586.2	3884.42	4679812	0.000830038	0.298734	0.0137678	16.587	67.4247	1.53922	0.248234	0.879699	0.507397	1.77287	0.0148314	1.53922	0.868208	3173.54	27.8791	94.907	2.8996	416.697	12.047
2019-02-25	DuffBrown_03	935.392	60493.5	16090.5	37297.8	3685.38	3933408	0.000936942	0.26412	0.0130623	13.9414	64.9588	1.61102	0.263634	0.9244	0.559331	1.85739	0.0153944	1.61102	0.867357	3268.55	29.0763	98.4823	3.14826	451.091	13.4405
2019-02-25	DuffBrown_04	1291.93	86831.3	22858.9	52040.3	6087.12	5793802	0.00105063	0.375094	0.021575	20.5354	66.9815	1.62694	0.260835	0.725001	0.536682	1.78116	0.0149295	1.62694	0.913411	3251.76	22.8343	95.5303	3.08478	436.235	12.5548
2019-02-25	DuffBrown_05	1559.2	83486.6	21675.5	48532.1	5752.98	5626179	0.00102254	0.356455	0.0203907	19.9412	67.9901	1.55138	0.259235	0.69731	0.525477	1.70088	0.014708	1.55138	0.9121	3242.06	21.9789	94.1235	2.89855	428.804	11.8291
2019-02-25	DuffBrown_06	1453.04	70110.2	19423	44686.7	4761.54	4736294	0.00100533	0.31129	0.0168766	16.7872	67.3576	1.64887	0.27177	0.812327	0.556058	1.83811	0.0148461	1.64887	0.897046	3316.27	25.4571	95.0008	3.10915	448.958	13.2522
2019-02-25	DuffBrown_07	1972.96	50398	26644.2	67317.3	948.485	1501811	0.000631561	0.334806	0.00336178	5.32297	30.0648	2.06956	0.527515	0.884001	2.41815	2.25045	0.0332615	2.06956	0.919619	4320	25.9469	210.929	8.58358	1248.01	31.8271
2019-02-25	DuffBrown_08	1319.97	47710.7	23151.7	58035.2	3140.83	1725098	0.00182067	0.298946	0.0111323	6.11438	36.592	1.95425	0.478124	0.77412	1.80078	2.10198	0.0273284	1.95425	0.929715	4175.14	22.9078	173.806	6.69894	1045.74	27.0811
2019-02-25	DuffBrown_09	1240.44	69890.1	17687	40082.7	4710.45	4890118	0.000963259	0.296075	0.0166956	17.3324	70.7604	1.55631	0.250699	0.693857	0.488279	1.70398	0.0141322	1.55631	0.91334	3189.18	21.9619	90.4642	2.79554	403.737	11.2899
2019-02-25	DuffBrown_10	1972.55	45437	27327.9	70238.2	433.333	745680	0.000581125	0.33166	0.00153589	2.64296	16.9566	3.74395	0.605249	0.983223	4.91927	3.8709	0.0589741	3.74395	0.967203	4520.65	28.553	369.383	26.8256	1805.57	63.3132
2019-02-25	DuffBrown_11	1284.32	69121.8	20602	48906.4	3034.56	4051480	0.000749	0.321519	0.0107556	14.3599	59.5995	2.36326	0.30267	2.01795	0.699895	3.10759	0.0167787	2.36326	0.76048	3483.94	62.4532	107.265	5.026	538.729	25.6565
2019-02-25	DuffBrown_12	1348.67	73338.2	20128.8	46415.5	4154.48	4717211	0.000880706	0.324423	0.014725	16.7195	65.1178	1.56074	0.271233	0.95917	0.574049	1.83192	0.0153568	1.56074	0.851972	3313.17	30.0661	98.2438	3.0427	460.63	13.4776
2019-02-25	DuffBrown_13	1214.55	75263.5	22649.4	53286.2	3654.41	4299567	0.000849949	0.350669	0.0129526	15.2392	57.9583	1.60685	0.297973	0.924325	0.708544	1.85373	0.0172538	1.60685	0.866816	3459.72	28.6573	110.276	3.51284	543.881	15.4928
2019-02-25	DuffBrown_14	1349	78834.7	21538	49493.9	4583.08	4994565	0.000917613	0.347578	0.0162441	17.7026	63.9486	1.60604	0.272604	0.903642	0.5875	1.84281	0.0156376	1.60604	0.871519	3321.07	28.3083	100.026	3.18733	469.27	13.7559
2019-02-25	DuffBrown_15	811.545	68097	17333.2	39390.2	4300	4646871	0.000925354	0.28949	0.0152408	16.4702	68.8408	1.59407	0.254926	0.864289	0.510357	1.8133	0.0145263	1.59407	0.8791	3215.62	27.2989	92.9687	2.94204	418.689	12.3674
2019-02-25	DuffBrown_16	1801.62	98621.7	26365.2	60553.1	5430.51	6184264	0.000878117	0.430314	0.0192477	21.9193	63.0859	1.59107	0.266192	0.78585	0.581524	1.77456	0.0158514	1.59107	0.8966	3283.73	24.6892	101.383	3.20013	465.441	13.1651
2019-02-25	DuffBrown_17	1778.06	91241.5	27257.5	64922.7	3880.83	5339509	0.000726815	0.425401	0.0137551	18.9252	58.9762	1.71786	0.298354	1.25335	0.697207	2.12648	0.016956	1.71786	0.807841	3461.7	38.8525	108.389	3.69174	537.121	17.5866
2019-05-08	ASH15D_01	149.871	722.66	152.311	324.662	4.82563	1287397	3.74836e-06	0.00159228	1.00521e-05	2.68174	1859.64	3.05937	0.213387	6.02257	0.0158142	6.75507	0.00053774	3.05937	0.4529	2931.45	194.767	3.46556	0.211988	15.9318	2.13337
2019-05-08	ASH15D_02	bd	488.33	202.351	412.647	6.58715	638284	1.03201e-05	0.00146446	1.37215e-05	1.32959	1346.43	3.55285	0.417936	4.26852	0.0427792	5.55365	0.000742707	3.55285	0.639733	3974.89	127.832	4.78602	0.339945	42.5338	4.61627
2019-05-08	ASH15D_03	94.6842	459.27	64.4406	83.8346	bd	867894	bd	0.0008064	bd	1.80789	1932.72	2.82732	0.139495	7.93861	0.00994707	8.42705	0.000517406	2.82732	0.335505	2220.95	275.133	3.33455	0.188505	10.0502	1.68412
2019-05-08	ASH15D_04	29.9384	573.8	211.436	440.446	bd	795647	bd	0.00162686	bd	1.65739	1441.62	2.69867	0.367063	4.17474	0.0350909	4.97104	0.000693662	2.69867	0.542878	3779.34	126.591	4.47008	0.241177	35.0198	3.41659
2019-05-08	ASH15D_05	bd	707.846	256.902	593.769	bd	973602	bd	0.00206863	bd	2.02808	1434.24	2.83006	0.375679	4.3919	0.0360995	5.22475	0.000697235	2.83006	0.541664	3814.48	132.87	4.4931	0.254221	36.0087	3.69008
2019-05-08	ASH15D_06	bd	388.283	64.8327	97.9659	bd	709671	bd	0.000731455	bd	1.4783	1855.55	3.44142	0.15616	7.69193	0.0115985	8.42669	0.000538925	3.44142	0.408395	2414.5	261.201	3.4732	0.238986	11.7092	1.96016
2019-05-08	ASH15D_07	bd	821.149	190.997	365.274	160.218	1408468	0.000113753	0.00182826	0.000333746	2.93394	1793.71	2.35999	0.231827	4.78805	0.0178122	5.33807	0.000557503	2.35999	0.442106	3064.7	153.098	3.5929	0.169535	17.927	1.89534
2019-05-08	ASH15D_08	bd	542.45	230.953	516.299	193.145	628971	0.000307081	0.00171183	0.000402335	1.31019	1166.84	3.93724	0.408353	4.11871	0.0482313	5.69786	0.000857012	3.93724	0.691003	3940.12	123.612	5.52229	0.434651	47.8289	5.31016
2019-05-08	ASH15D_09	bd	675.73	100.93	209.958	9.24242	1247795	7.40701e-06	0.00130955	1.92526e-05	2.59925	1925.53	2.25448	0.157902	7.5759	0.0113017	7.90423	0.000519338	2.25448	0.285224	2433.32	256.767	3.347	0.150874	11.4112	1.79225
2019-05-08	ASH15D_10	bd	408.954	77.0666	122.966	24.2424	663907	3.65148e-05	0.000808313	5.04987e-05	1.38297	1763.25	2.70275	0.202918	8.42471	0.0158603	8.84764	0.000567133	2.70275	0.305477	2849.81	274.417	3.65494	0.197509	15.9779	2.80134
2019-05-10	ASH15D_01	bd	515.512	37.2867	34.6379	bd	1042436	bd	0.00113728	bd	2.67439	2117.32	2.80012	0.0773484	11.8246	0.00503466	12.1516	0.000472295	2.80012	0.230433	1130.19	470.99	3.04389	0.170423	5.09929	1.23543
2019-05-10	ASH15D_02	94.2317	186.152	43.9854	65.9988	16.0188	292705	5.47269e-05	0.000573321	4.10966e-05	0.750939	1613.76	5.14486	0.220494	10.2189	0.0188306	11.441	0.000619671	5.14486	0.449687	2984.31	328.973	3.99342	0.410771	18.9425	4.28518
2019-05-10	ASH15D_03	bd	495.449	95.0429	198.723	8.69231	856011	1.01544e-05	0.00152792	2.23003e-05	2.19611	1770.79	2.51607	0.173399	5.51089	0.0134954	6.0581	0.000564719	2.51607	0.415324	2590.72	183.883	3.63938	0.183085	13.6113	1.63685
2019-05-10	ASH15D_04	bd	751.005	177.132	341.292	6.69231	1325276	5.04975e-06	0.00245762	1.71692e-05	3.40002	1806.97	1.90444	0.236565	3.9252	0.0180429	4.3628	0.000553412	1.90444	0.436517	3097.01	125.173	3.56653	0.135806	18.1571	1.56902
2019-05-10	ASH15D_05	77.6921	552.365	124.521	261.7	bd	892492	bd	0.00181711	bd	2.28971	1681.5	2.64172	0.224305	4.81526	0.0183844	5.4923	0.000594709	2.64172	0.480986	3011.85	154.653	3.8326	0.20243	18.4977	2.01151
2019-05-10	ASH15D_06	77.8613	270.855	11.7702	bd	bd	599321	bd	0.000508917	bd	1.53757	2228.37	3.52348	0.0253535	35.8021	0.00156803	35.9751	0.000448758	3.52348	0.0979422	-	-	2.89223	0.203765	1.59091	1.14312
2019-05-10	ASH15D_07	220.043	564.855	64.0225	84.149	11.6923	1126269	1.03815e-05	0.00138042	2.99968e-05	2.88946	2034.9	1.98766	0.109967	8.47915	0.00744775	8.70901	0.000491424	1.98766	0.228231	1798.86	308.569	3.16714	0.125872	7.5343	1.30663
2019-05-10	ASH15D_08	54.45	628.329	332.679	786.721	40.1178	469364	8.54727e-05	0.00338361	0.000102923	1.20416	769.454	3.35966	0.503612	3.40603	0.0902025	4.78418	0.00129962	3.35966	0.702244	4251.82	100.352	8.37246	0.562183	87.692	8.00692
2019-05-10	ASH15D_09	133.451	528.213	271.367	581.791	94.1368	558176	0.000168651	0.00267434	0.000241509	1.43201	1031.67	4.46498	0.471738	4.90258	0.0630183	6.63108	0.000969304	4.46498	0.673341	4155.23	145.244	6.24551	0.557427	62.0524	7.95186
2019-05-10	ASH15D_10	202.278	1382.07	572.742	1198.98	118.442	1523351	7.77512e-05	0.00610575	0.000303866	3.90818	1148.79	3.52026	0.391681	4.04729	0.0469892	5.36403	0.000870481	3.52026	0.656272	3877.45	121.949	5.60904	0.394722	46.625	4.87712
2016-08-04	CJ1a_01	bd	230.618	103.766	266.366	7910.95	15141	3.03919	0.00181303	0.310021	0.102008	53.1039	4.33717	0.477038	7.16279	1.23803	8.37357	0.018831	4.33717	0.51796	4171.77	106.001	120.264	10.3271	817.99	89.9612
2016-08-04	CJ1a_02	84.7315	238.987	102.337	269.038	7395.99	16094.4	2.67303	0.00187882	0.289841	0.108432	56.6328	4.93904	0.477307	5.95116	1.16154	7.73372	0.0176576	4.93904	0.638637	4172.61	88.0664	112.835	11.0395	782.68	81.0712
2016-08-04	CJ1a_03	3.69423	234.189	110.115	290.586	6109.96	14250.4	2.49398	0.0018411	0.239442	0.096008	52.2014	4.87102	0.505733	5.58579	1.3352	7.41134	0.0191566	4.87102	0.657239	4258.01	82.2588	122.323	11.7936	861.142	82.6025
2016-08-04	CJ1a_04	bd	237.877	116.193	251.246	4870.97	12881.3	2.19958	0.0018701	0.190888	0.086784	45.1961	4.23849	0.524352	5.49865	1.59893	6.94261	0.0221258	4.23849	0.610503	4311.17	80.7364	141.077	11.8183	969.791	83.2331
2016-08-04	CJ1a_05	1.59088	235.231	143.457	337.523	3631.09	10961.7	1.92682	0.00184929	0.142298	0.0738513	38.7889	5.15438	0.657217	6.12532	2.33511	8.00545	0.0257806	5.15438	0.643859	4639.9	88.4074	164.086	16.6802	1223.03	107.886
2016-08-04	CJ1a_06	bd	208.916	98.2897	247.046	9707.53	16361.4	3.45121	0.00164241	0.380427	0.11023	65.4569	3.99722	0.462165	5.6909	0.973077	6.95443	0.0152772	3.99722	0.574774	4124.84	84.4494	97.7386	7.75006	690.049	67.3656
2016-08-04	CJ1a_07	d	218.078	98.8452	254.865	8305.76	16698.1	2.89332	0.00171444	0.325494	0.112498	62.4999	4.6977	0.47108	6.46285	1.03877	7.9898	0.016	4.6977	0.587963	4153.17	95.7462	102.326	9.53103	723.307	79.4768
2016-08-04	CJ1a_08	bd	223.67	98.2896	257.363	7205.41	15493	2.70524	0.00175841	0.282372	0.10438	54.899	4.37957	0.474523	5.70944	1.19124	7.19571	0.0182153	4.37957	0.608635	4163.95	84.5316	116.366	10.0933	796.534	76.4862
2016-08-04	CJ1a_09	5.93664	252.84	124.401	302.304	5546.26	13860.1	2.32764	0.00198773	0.217352	0.0933788	45.089	4.15455	0.511845	5.38088	1.56449	6.7981	0.0221784	4.15455	0.611134	4275.69	79.1629	141.409	11.6114	956.248	80.9099
2016-08-04	CJ1a_10	30.3159	265.009	148.521	335.899	4474.76	12013.3	2.16666	0.0020834	0.175361	0.0809362	36.9061	4.25541	0.586816	4.73239	2.19134	6.36428	0.0270958	4.25541	0.66864	4475.69	68.875	172.346	14.4575	1178.29	85.0794
2016-08-04	CJ1a_11	102.801	293.044	112.322	337.792	12190.4	22591.6	3.13873	0.0023038	0.477727	0.152204	63.7041	3.69153	0.417424	5.40734	0.903058	6.54727	0.0156976	3.69153	0.563828	3973.06	80.9777	100.407	7.35149	653.36	61.2108
2016-08-04	CJ1a_12	84.7777	283.805	99.7976	264.199	10982.9	21567.2	2.96213	0.00223116	0.430406	0.145303	62.0561	4.23474	0.359155	6.21032	0.797633	7.51672	0.0161144	4.23474	0.563376	3746.28	94.3643	103.052	8.6528	595.493	65.5681
2016-08-04	CJ1a_13	bd	259.189	122.665	280.38	9368.94	18463.9	2.95155	0.00203765	0.367159	0.124395	59.9424	3.70577	0.476479	4.04489	1.09551	5.48579	0.0166827	3.70577	0.675523	4170.04	59.8658	106.656	7.83508	751.176	56.6314
2016-08-04	CJ1a_14	15.1974	218.564	114.982	297.84	7099.06	15434	2.67551	0.00171826	0.278204	0.103982	59.1046	4.43161	0.528668	6.05448	1.23273	7.50306	0.0169191	4.43161	0.59064	4323.2	88.8388	108.155	9.49908	815.581	80.8222
2016-08-04	CJ1a_15	bd	279.702	157	428.794	5292.36	13132.2	2.3442	0.00219891	0.207402	0.0884742	38.9206	3.93953	0.585661	4.62573	2.07383	6.07596	0.0256933	3.93953	0.64838	4472.82	67.3327	163.538	12.7106	1140.2	80.01
2016-08-04	CJ1a_16	bd	405.024	262.666	667.154	7327.24	14791.9	2.88137	0.00318414	0.287146	0.0996563	29.9065	4.45089	0.694043	4.2107	3.19835	6.12703	0.0334375	4.45089	0.726436	4718.43	60.5411	212.027	18.5404	1456.76	90.6218
2016-08-04	CJ1a_17	65.779	321.241	144.877	396.055	12678.1	20652.9	3.57071	0.00252547	0.49684	0.139143	53.0375	3.68411	0.476105	4.20986	1.23716	5.59425	0.0188546	3.68411	0.658554	4168.88	62.3117	120.413	8.78395	817.593	60.9577
2016-08-04	CJ1a_18	0.0898048	262.468	108.686	285.167	12722.1	20040.9	3.69254	0.00206342	0.498567	0.13502	60.607	5.40454	0.477528	7.87568	1.08588	9.55172	0.0164998	5.40454	0.565818	4173.29	116.541	105.496	11.3005	746.5	96.2684
2016-08-04	CJ1a_19	49.5645	286.609	119.561	323.877	11019.2	19063	3.36233	0.00225321	0.431829	0.128432	53.6298	4.42741	0.44021	5.23263	1.13125	6.85437	0.0186463	4.42741	0.645925	4052.46	77.9834	119.095	10.4404	768.35	71.3198
2016-08-04	CJ1a_20	bd	290.406	152.367	385.195	7553.85	16678.1	2.63454	0.00228306	0.296027	0.112364	47.876	3.76646	0.531074	3.94987	1.52877	5.45781	0.0208873	3.76646	0.690105	4329.86	57.9362	133.261	9.92776	942.006	64.8875
2016-08-04	CJ1a_21	bd	360.777	217.665	576.3	9358.47	17221.2	3.16099	0.00283629	0.366748	0.116023	40.1103	3.36601	0.610354	4.37454	2.09716	5.51966	0.0249312	3.36601	0.609823	4532.84	63.479	158.746	10.5477	1147.88	73.1968
2016-08-04	CJ1a_22	bd	416.334	322.979	828.802	1972.15	2916.01	3.934	0.00327306	0.0772864	0.0196458	5.74759	3.99024	0.79913	4.30171	19.1619	5.86743	0.173986	3.99024	0.680066	4920.19	61.2713	1034.04	75.7954	3050	107.362
2016-08-04	CJ1a_23	101.627	349.294	160.871	390.587	13601.1	22880.3	3.45776	0.00274602	0.533013	0.15415	53.1788	4.31134	0.487717	5.03782	1.26396	6.63078	0.0188045	4.31134	0.650201	4204.51	74.4141	120.096	10.2515	829.687	72.525
2016-08-04	CJ1a_24	d	313.356	142.655	370.063	14596.8	20830	4.07617	0.00246349	0.572033	0.140336	54.2202	3.65462	0.480413	4.98797	1.22112	6.18354	0.0184433	3.65462	0.591024	4182.21	73.7721	117.81	8.52718	810.289	66.7916
2016-08-04	CJ1a_25	76.7571	313.687	133.758	343.872	12570.2	21846.5	3.34691	0.00246609	0.492613	0.147184	57.4924	4.33666	0.482545	6.37654	1.15673	7.71148	0.0173936	4.33666	0.562364	4188.75	94.2735	111.162	9.55174	780.418	80.6979
2016-08-04	CJ1a_26	bd	401.519	301.704	701.815	4987.56	7227.48	4.01406	0.00315658	0.195457	0.0486931	14.6895	4.20799	0.774735	4.17961	7.26862	5.93096	0.0680758	4.20799	0.709496	4875.98	59.6516	424.552	34.4867	2144.96	100.713
2016-08-04	CJ1a_27	bd	375.336	296.942	744.331	4951.79	8561.18	3.36443	0.00295075	0.194055	0.0576785	18.643	4.5174	0.77846	3.88517	5.75476	5.95831	0.0536395	4.5174	0.758168	4882.83	55.4321	336.827	29.5823	1939.63	98.1825
2016-08-04	CJ1a_28	161.778	385.753	311.728	755.784	3370.68	4804.32	4.08101	0.00303264	0.132093	0.0323677	9.95729	4.27602	0.818943	3.21469	11.3349	5.34963	0.100429	4.27602	0.799311	4955.04	45.7169	616.922	50.1182	2551.08	95.2231
2016-08-04	CJ1a_29	76.3417	374.815	310.593	778.875	2653.96	3512.64	4.39484	0.00294665	0.104006	0.0236654	7.23538	5.50578	0.852263	4.10558	16.2337	6.868	0.13821	5.50578	0.801657	5011.69	58.2409	834.531	85.6241	2890.66	123.549
2016-08-04	CJ1a_30	18.4198	353.982	198.211	499.963	13914.7	16928	4.78134	0.00278287	0.545302	0.114048	39.3793	3.46571	0.571626	4.05797	2.00055	5.33651	0.025394	3.46571	0.649435	4437.48	59.1781	161.657	11.0563	1115.7	69.7996
2016-08-04	CJ1a_31	bd	313.687	172.806	447.842	11861.5	18829.5	3.66423	0.00246609	0.464839	0.126859	49.2809	3.6872	0.551469	5.00996	1.54223	6.22054	0.0202918	3.6872	0.592745	4385.06	73.2657	129.5	9.44764	947.394	73.8799
2016-08-04	CJ1a_32	bd	291.465	162.496	421.837	7466.59	14596.3	2.97551	0.00229138	0.292607	0.0983385	41.7003	4.01964	0.569348	4.90199	1.88167	6.33932	0.0239806	4.01964	0.63408	4431.66	71.5086	152.765	12.1254	1074.65	80.7636
2016-08-04	CJ1a_33	bd	234.71	142.496	343.872	4110.29	10427.8	2.29279	0.0018452	0.161078	0.070254	33.0122	5.5424	0.648739	7.03286	2.70833	8.95429	0.0302918	5.5424	0.618966	4621.15	101.6	192.375	20.9751	1330.74	124.81
2016-08-04	CJ1a_34	bd	267.907	182.381	438.395	2032.75	6294.43	1.87849	0.00210618	0.0796611	0.0424069	13.2941	9.79887	0.699657	5.28321	7.25326	11.1324	0.0752215	9.79887	0.880213	4730.01	75.9193	467.537	87.7825	2143.08	181.457
2016-08-04	CJ1a_35	bd	221.168	164.351	385.975	1962.41	6549.89	1.74277	0.00173874	0.0769049	0.044128	24.4397	5.00996	0.739211	5.02306	4.16849	7.09442	0.040917	5.00996	0.706183	4808.89	71.912	258.515	25.3406	1667.85	110.015
2016-08-04	CJ1a_36	1.65348	239.918	147.258	379.649	2646.11	10169.3	1.51356	0.00188614	0.103698	0.0685126	35.1054	4.03934	0.662179	5.75894	2.5996	7.03432	0.0284856	4.03934	0.574233	4650.75	83.0749	181.063	14.4079	1300.53	98.2546
2016-08-04	CJ1a_37	30.1411	232.413	159.191	410.54	3197.69	9893.04	1.88014	0.00182714	0.125314	0.0666515	33.905	4.22233	0.701952	5.25173	2.85331	6.7386	0.0294941	4.22233	0.626589	4734.72	75.4499	187.381	15.5771	1369.68	96.5884
2016-08-04	CJ1a_38	76.7799	207.576	98.5204	235.092	9260.37	15876.6	3.39276	0.00163188	0.362904	0.106964	62.5341	4.44518	0.483973	6.08536	1.06662	7.53599	0.0159913	4.44518	0.58986	4193.12	89.9461	102.271	9.01419	737.082	76.0644
2016-08-04	CJ1a_39	bd	204.162	83.7658	243.554	9650.48	15657.2	3.58523	0.00160504	0.378192	0.105486	62.9262	4.30654	0.422904	5.24031	0.926224	6.78286	0.0158916	4.30654	0.634915	3992.58	78.3822	101.638	8.6797	665.646	64.1634
2016-08-04	CJ1a_40	12.1151	206.501	80.5912	235.092	10256.4	16119.8	3.70099	0.00162343	0.401937	0.108603	62.5632	4.62445	0.413146	6.90228	0.910103	8.30825	0.0159838	4.62445	0.55661	3957.62	103.464	102.224	9.37319	657.112	77.3665
2016-08-04	CJ1a_41	100.861	320.648	149.163	385.118	11049.4	20799	3.09014	0.00252081	0.433013	0.140127	53.569	4.01203	0.463577	4.13978	1.19265	5.7649	0.0186675	4.01203	0.69594	4129.36	61.4154	119.229	9.47211	797.191	61.762
2016-08-04	CJ1a_42	99.3803	340.671	194.097	478.718	8600.19	16283.3	3.0722	0.00267823	0.337032	0.109704	38.9331	3.62222	0.583357	4.84028	2.06501	6.04556	0.0256851	3.62222	0.599154	4467.08	70.4769	163.486	11.6841	1137.28	79.5188
2016-08-04	CJ1a_43	119.665	389.96	231.728	568.174	7622.33	17289	2.56448	0.00306571	0.29871	0.11648	34.3148	4.83212	0.613362	3.82664	2.46344	6.16381	0.029142	4.83212	0.78395	4539.97	55.5082	185.176	17.6172	1261.37	85.3424
2016-08-04	CJ1a_44	21.0329	397.732	316.466	749.435	3614.9	6727.45	3.12556	0.00312682	0.141664	0.0453243	13.3458	4.70565	0.810267	4.32351	8.36737	6.3903	0.0749298	4.70565	0.736374	4939.89	61.5274	465.788	42.1524	2271.65	109.766
2016-08-04	CJ1a_45	43.5184	461.837	269.904	720.069	9580.48	22525.1	2.47402	0.00363078	0.375448	0.151756	39.0082	3.26709	0.588267	3.52806	2.07838	4.80843	0.0256356	3.26709	0.679449	4479.28	51.3376	163.175	10.5197	1141.7	63.8755
2016-08-04	CJ1a_46	32.6377	426.387	198.829	514.202	9569.21	23000.6	2.42002	0.00335209	0.375007	0.15496	45.2046	3.60547	0.490148	4.67479	1.49435	5.90365	0.0221217	3.60547	0.610719	4211.85	69.0228	141.051	10.0528	928.087	69.3983
2016-08-04	CJ1a_47	79.6581	434.063	243.759	678.642	7855.49	17768.5	2.57161	0.00341244	0.307848	0.11971	32.7694	3.86887	0.57615	4.20299	2.42311	5.71255	0.0305163	3.86887	0.677257	4448.97	61.2558	193.779	14.7541	1249.48	78.9669
2016-08-04	CJ1a_48	bd	389.399	216.782	504.868	8701.83	18666.5	2.71163	0.0030613	0.341015	0.12576	39.7735	4.22063	0.544861	4.03454	1.88798	5.83877	0.0251424	4.22063	0.722863	4367.42	59.0572	160.074	13.3321	1076.87	74.6984
2016-08-04	CJ1a_49	16.9513	405.752	292.323	758.972	3243.85	5110.77	3.69196	0.00318986	0.127123	0.0344324	10.2528	4.50041	0.73737	3.79105	9.91169	5.88436	0.097534	4.50041	0.764808	4805.32	54.2832	599.941	51.3579	2426.6	103.127
2016-08-04	CJ1a_50	85.0837	383.806	275.83	720.863	4757.12	9592.42	2.88468	0.00301733	0.186426	0.0646262	19.8003	4.08025	0.746519	3.62344	5.19607	5.4569	0.0505042	4.08025	0.747723	4822.97	51.8405	317.617	25.2414	1851.97	88.922
2016-08-04	CJ1a_51	bd	351.783	291.906	713.249	3549.27	6562.89	3.14577	0.00276558	0.139092	0.0442156	14.5004	4.8716	0.83535	4.03459	7.93951	6.32538	0.0689635	4.8716	0.770168	4983.24	57.3053	429.908	40.3938	2224.18	108.118
2016-08-04	CJ1a_52	bd	379.19	302.656	791.376	880.337	1558.8	3.28504	0.00298105	0.0344994	0.010502	3.41527	4.73636	0.794869	4.28105	32.0758	6.38439	0.292803	4.73636	0.741865	4912.57	60.9979	1655.52	136.842	3552.62	118.536
2016-08-04	CJ1a_53	65.8894	389.399	316.839	776.42	349.87	682.909	2.98007	0.0030613	0.013711	0.0046009	1.45507	4.32608	0.828594	3.71231	78.4808	5.70054	0.687251	4.32608	0.758889	4971.7	52.7547	3372.12	223.273	4442.82	108.319
2016-08-04	CJ1a_54	8.57692	398.344	225.634	572.268	7710.3	14820.1	3.02623	0.00313163	0.302158	0.0998462	30.2789	3.77555	0.581859	4.20475	2.6484	5.65107	0.0330263	3.77555	0.668112	4463.34	61.2352	209.461	15.5436	1314.2	80.064
2016-08-04	CJ1a_55	bd	360.216	220.06	579.526	8878.44	18130.2	2.84851	0.00283188	0.347936	0.122147	39.2514	4.79728	0.622797	4.92167	2.18674	6.8729	0.0254768	4.79728	0.697999	4562.1	71.3121	162.177	15.3478	1176.83	91.5231
2016-08-04	CJ1a_56	bd	378.461	266.307	660.173	5540.03	9477.47	3.40018	0.00297532	0.217108	0.0638517	20.1314	4.50887	0.735737	4.00852	5.0368	6.03308	0.0496737	4.50887	0.747357	4802.15	57.4055	312.518	27.4513	1825.53	97.3983
2016-08-04	CJ1a_57	20.554	388.291	291.355	713.4	3552.45	5684.91	3.63485	0.00305259	0.139216	0.0383004	12.2495	3.96008	0.771349	3.73826	8.67839	5.44581	0.0816362	3.96008	0.72718	4869.73	53.3679	505.881	38.4201	2304.81	94.6165
2016-08-04	CJ1a_58	114.721	377.42	301.16	748.406	2159.92	3606.8	3.48336	0.00296713	0.0846449	0.0242998	7.77277	4.49035	0.818511	4.49349	14.5129	6.35253	0.128654	4.49035	0.706859	4954.29	63.9053	780.184	65.6565	2783.85	114.039
2016-08-04	CJ1a_59	bd	345.529	270.791	662.925	1072.9	1658.96	3.76188	0.00271641	0.0420458	0.0111768	3.84747	4.34865	0.813472	4.28591	29.1389	6.10572	0.259911	4.34865	0.712226	4945.51	60.977	1489.39	114.636	3458.21	113.314
2016-08-04	CJ1a_60	bd	372.732	294.243	716.348	796.777	1240.25	3.7369	0.00293027	0.0312248	0.00835581	2.6726	4.10508	0.806357	3.71189	41.5814	5.53442	0.374167	4.10508	0.741736	4933.01	52.8398	2048.98	142.524	3809.13	104.216
2016-08-04	CJ1a_61	76.3502	317.254	271.815	639.909	396.769	630.356	3.6613	0.00249413	0.0155489	0.00424684	1.53745	5.72627	0.879486	4.44605	78.8378	7.24966	0.650429	5.72627	0.789868	5056.25	62.9489	3229.88	284.578	4447.38	135.87
2019-02-25	NR1707_spots_05	237.41	400.016	66.3459	124.95	3614.71	34606	0.104453	0.0013714	0.0128118	0.122656	88.5316	2.74654	0.163767	6.39403	0.254938	6.95896	0.0112954	2.74654	0.394677	2494.93	215.369	72.4067	3.95389	230.58	28.3106	large uncertainty
2019-02-25	NR1707_spots_06	bd	347.267	264.203	697.059	548.387	4275.14	0.128274	0.00303481	0.00194368	0.0151526	12.3586	5.06599	0.778685	5.02619	8.6836	7.13631	0.0809156	5.06599	0.70989	4883.24	143.421	501.585	48.7092	2305.36	122.287	large uncertainty
2019-02-25	NR1707_spots_11	bd	319.999	176.64	384.694	1459.38	12518.5	0.116577	0.00204403	0.00517256	0.0443702	39.2082	6.02924	0.522455	5.9004	1.83645	8.43603	0.0255049	6.02924	0.714702	4305.85	173.322	162.353	19.3039	1058.59	105.268	large uncertainty
2019-02-25	NR1707_spots_12	bd	472.361	34.1893	10.6502	5560.66	48696.1	0.114191	0.00119952	0.019709	0.172597	103.598	2.9622	0.0755186	9.35128	0.100464	9.80924	0.0096527	2.9622	0.301981	1082.34	375.13	61.9269	3.6502	97.2042	18.0247	large uncertainty
2019-02-25	NR1707_spots_13	bd	298.763	36.2322	52.1181	2725	28361.8	0.0960799	0.000897813	0.0096584	0.100525	94.2136	3.18026	0.117216	9.51325	0.171467	10.0308	0.0106142	3.18026	0.317051	1914.21	341.406	68.0628	4.30493	160.691	29.3862	large uncertainty
2019-02-25	NR1707_spots_23	266.636	544.6	204.414	439.239	2722.06	31655.6	0.0859898	0.00275586	0.00964798	0.112199	60.5394	4.20557	0.397598	6.13869	0.905133	7.44113	0.0165182	4.20557	0.565179	3900.02	184.701	105.613	8.80487	654.467	69.3691	large uncertainty
2019-02-25	NR1707_spots_25	101.036	1100.79	845.387	2068.8	250.758	3338.61	0.0751083	0.00931172	0.000888777	0.0118333	2.70649	8.03118	0.770647	2.58809	39.2424	8.43789	0.369483	8.03118	0.951799	4868.43	73.9002	2026.97	273.477	3751.76	154.691	large uncertainty
2019-02-25	NR1707_spots_29	279.767	1292.59	975.648	2405.18	944.048	12914.4	0.0731002	0.0108388	0.00334605	0.0457735	9.8208	3.72577	0.750244	2.28141	10.5284	4.36877	0.101825	3.72577	0.852818	4830.09	65.2587	625.093	44.2398	2482.42	77.9534	large uncertainty
2019-02-25	NR1707_spots_30	0.884202	279.613	60.9306	155.863	1579.51	21112.9	0.0748124	0.00115129	0.00559836	0.0748319	76.7294	3.41678	0.216857	7.675	0.389508	8.40119	0.0130328	3.41678	0.406702	2957.5	247.647	83.4722	5.66487	334.01	46.733	large uncertainty
2019-02-25	NR1707_spots_31	200.172	441.112	70.9815	176.508	2991.67	35938.7	0.0832436	0.00159704	0.0106036	0.12738	85.8133	2.6066	0.164199	6.50134	0.263708	7.00441	0.0116532	2.6066	0.372137	2499.37	218.887	74.687	3.86996	237.651	29.2574	large uncertainty
2019-02-25	NR1707_spots_32	89.9094	495.561	67.4815	120.985	5056.67	43956.8	0.115037	0.00158643	0.0179227	0.155799	89.3731	2.84957	0.14542	7.80471	0.224246	8.30864	0.0111891	2.84957	0.342964	2292.76	268.415	71.7287	4.06398	205.437	30.4452	large uncertainty
2019-02-25	NR1707_spots_33	301.503	342.436	71.2696	143.399	3155.74	24517.3	0.128715	0.00129206	0.0111851	0.0868982	72.5937	3.15404	0.2128	5.58893	0.403997	6.41748	0.0137753	3.15404	0.491476	2926.99	180.814	88.1952	5.52317	344.543	36.8246	large uncertainty
2019-02-25	NR1707_spots_34	109.967	408.938	53.9815	136.013	4061.21	37357.7	0.108711	0.00138908	0.0143944	0.132409	92.2195	2.4717	0.12067	7.92928	0.180336	8.30559	0.0108437	2.4717	0.297595	1966.15	282.823	69.5266	3.41761	168.35	25.448	large uncertainty
2019-02-25	NR1707_spots_35	296.909	409.12	52.9645	133.916	3845	35039	0.109735	0.00138227	0.0136281	0.124191	85.4734	2.51489	0.128898	8.48243	0.207836	8.84739	0.0116995	2.51489	0.284252	2083	298.51	74.9823	3.74851	191.735	30.455	large uncertainty
2019-02-25	NR1707_spots_36	421.795	431.79	50.7028	106.013	4385	39486.8	0.11105	0.00136489	0.015542	0.139956	92.6064	2.69029	0.118437	8.6423	0.176259	9.05135	0.0107984	2.69029	0.297225	1932.78	309.468	69.2378	3.70439	164.837	27.1768	large uncertainty
2019-02-25	NR1707_spots_37	144.007	480.352	69.2446	144.304	3929.17	41733.4	0.0941492	0.00160933	0.0139264	0.147918	87.7557	2.64287	0.135006	8.9322	0.212023	9.31498	0.0113953	2.64287	0.283723	2164.09	311.502	73.0432	3.83794	195.249	32.5636	large uncertainty
2019-02-25	NR1707_spots_38	205.608	418.837	89.4815	172.257	2983.9	29640.6	0.100669	0.00157842	0.010576	0.105057	71.0717	3.06079	0.202388	7.08728	0.392459	7.71997	0.0140703	3.06079	0.396477	2845.56	230.941	90.0707	5.47309	336.164	43.2519	large uncertainty
2019-02-25	NR1707_spots_01	106.62	109.495	41.5352	77.4022	508.333	4531	0.11219	0.000529793	0.00180172	0.0160595	37.0658	8.45782	0.339326	16.6499	1.26168	18.675	0.0269791	8.45782	0.452896	3659.74	508.948	171.613	28.5831	828.663	192.173	large uncertainty
2019-02-25	NR1707_spots_02	6.7111	158.252	19.0411	12.7242	1449.27	14629	0.0990681	0.000440697	0.00513673	0.0518505	93.8114	6.03297	0.132567	18.7538	0.194753	19.7003	0.0106597	6.03297	0.306238	2132.24	656.335	68.3531	8.19866	180.677	63.2051	large uncertainty
2019-02-25	NR1707_spots_03	bd	310.49	30.9292	15.7545	2329.1	30659.8	0.0759661	0.000828377	0.0082552	0.108669	98.0781	3.40869	0.106967	11.8021	0.150309	12.2845	0.010196	3.40869	0.277478	1748.38	432.191	65.3945	4.43413	142.185	32.0855	large uncertainty
2019-02-25	NR1707_spots_04	bd	129.503	49.4257	121.202	1778.79	8665.74	0.205267	0.000696078	0.00630468	0.0307146	66.4288	5.67257	0.401326	11.627	0.83262	12.937	0.0150537	5.67257	0.438478	3914.05	349.523	96.3192	10.8372	615.065	112.852	large uncertainty
2019-02-25	NR1707_spots_07	226.906	420.184	41.914	36.209	4406.82	43744.1	0.100741	0.0011557	0.0156194	0.155045	105.611	2.82327	0.111024	10.2789	0.144882	10.6596	0.00946872	2.82327	0.264858	1816.25	373.268	60.7521	3.41338	137.383	27.0309	large uncertainty
2019-02-25	NR1707_spots_08	214.979	330.945	20.2474	36.5457	3900.91	30842.6	0.126478	0.000899262	0.0138263	0.109317	97.3956	3.03864	0.0664311	17.8553	0.0940022	18.112	0.0102674	3.03864	0.16777	819.987	745.855	65.8505	3.98032	91.2247	31.1224	large uncertainty
2019-02-25	NR1707_spots_09	bd	265.679	28.8837	27.8486	2649.11	26000.2	0.101888	0.000747754	0.00938941	0.0921541	100.882	4.27911	0.103566	15.7723	0.141485	16.3425	0.00991258	4.27911	0.26184	1688.99	581.909	63.586	5.4128	134.366	40.3243	large uncertainty
2019-02-25	NR1707_spots_10	bd	261.133	38.8417	25.5744	2819.09	26829.3	0.105075	0.000755031	0.00999189	0.0950927	103.166	3.95853	0.165301	12.7805	0.220823	13.3795	0.00969311	3.95853	0.295866	2510.62	429.811	62.1849	4.89769	202.595	47.994	large uncertainty
2019-02-25	NR1707_spots_14	56.894	221.115	16.3459	3.18346	1633.33	20907.2	0.0781231	0.000558115	0.00578913	0.0741027	92.2523	3.68712	0.0652843	24.142	0.0975298	24.4219	0.0108398	3.68712	0.150976	783.51	1014.37	69.5021	5.0957	94.4936	43.1422	large uncertainty
2019-02-25	NR1707_spots_15	bd	190.913	21.0293	8.54445	1348.31	18033.8	0.0747654	0.000511365	0.00477889	0.0639185	96.4078	3.94333	0.119024	15.2971	0.170148	15.7972	0.0103726	3.94333	0.249622	1941.62	547.196	66.5217	5.21726	159.548	45.6077	large uncertainty
2019-02-25	NR1707_spots_16	74.8538	522.883	34.9997	23.3302	4590.48	51985.5	0.088303	0.00134798	0.0162703	0.184256	104.69	2.82665	0.0664823	12.7757	0.0875197	13.0846	0.00955199	2.82665	0.216028	821.598	533.532	61.2839	3.44722	85.1903	21.162	large uncertainty
2019-02-25	NR1707_spots_17	bd	234.67	32.2855	46.5986	2512.5	23296.2	0.10785	0.000727212	0.00890522	0.0825703	95.1067	3.8629	0.133705	11.506	0.193751	12.1371	0.0105145	3.8629	0.318271	2147.2	402.012	67.427	5.18004	179.825	39.2363	large uncertainty
2019-02-25	NR1707_spots_18	389.087	308.651	21.1134	26.6479	2800	30415.7	0.0920578	0.00082661	0.00992423	0.107804	98.2659	2.99549	0.057377	19.6	0.0804713	19.8276	0.0101765	2.99549	0.151077	506.052	862.332	65.2702	3.88942	78.5879	29.5544	large uncertainty
2019-02-25	NR1707_spots_19	bd	159.247	13.0952	15.9439	857.292	13071.8	0.0655832	0.000436682	0.00303856	0.0463313	85.6418	5.51936	0.0721049	40.5486	0.116034	40.9225	0.0116765	5.51936	0.134873	988.903	1649.74	74.8358	8.20792	111.47	82.9232	large uncertainty
2019-02-25	NR1707_spots_20	bd	241.822	35.3231	26.1668	2265.91	24185	0.0936908	0.000703457	0.00803121	0.0857204	99.4809	4.62532	0.123024	17.2159	0.170435	17.8265	0.0100522	4.62532	0.259464	2000.55	611.605	64.477	5.93207	159.796	51.3923	large uncertainty
2019-02-25	NR1707_spots_21	bd	199.498	37.9157	48.5828	1336.54	16983.2	0.0786975	0.000663298	0.00473718	0.0601948	84.2714	4.59824	0.20072	10.633	0.328259	11.5846	0.0118664	4.59824	0.396926	2832.06	346.897	76.0456	6.94868	288.236	56.5366	large uncertainty
2019-02-25	NR1707_spots_22	147.679	208.453	31.9898	52.1542	1361.54	17415.5	0.0781797	0.000678606	0.00482579	0.0617269	81.3431	3.90241	0.161849	13.4177	0.274217	13.9737	0.0122936	3.90241	0.279269	2475.07	452.846	78.7665	6.10729	246.06	59.303	large uncertainty
2019-02-25	NR1707_spots_24	337.497	80.6141	47.5589	49.2772	362.195	3028.15	0.119609	0.000411552	0.00128375	0.0107329	31.1391	13.082	0.589662	22.4121	2.60978	25.9507	0.032114	13.082	0.50411	4482.73	652.129	203.766	52.267	1303.39	323.526	large uncertainty
2019-02-25	NR1707_spots_26	44.3048	167.327	30.3872	15.7545	1041.05	15684.4	0.0663746	0.000495089	0.00368985	0.0555912	92.5356	4.48546	0.207253	10.6615	0.308673	11.5666	0.0108066	4.48546	0.387794	2884.19	346.217	69.2904	6.17973	273.152	53.9443	large uncertainty
2019-02-25	NR1707_spots_27	bd	180.272	21.1938	23.9096	912.687	16156.8	0.0564894	0.000522703	0.0032349	0.0572656	91.4063	4.23157	0.124252	20.8524	0.187342	21.2774	0.0109402	4.23157	0.198876	2018.17	739.283	70.1418	5.90132	174.358	65.9856	large uncertainty
2019-02-25	NR1707_spots_28	bd	221.011	18.7684	24.7436	1598.48	19119.9	0.0836032	0.000613496	0.00566562	0.0677679	87.4099	4.05569	0.0894783	18.4325	0.141079	18.8734	0.0114403	4.05569	0.214889	1414.42	705.122	73.3305	5.9117	134.005	46.3143	large uncertainty
2019-02-25	NR1708_T3_01	bd	490.26	293.675	646.032	37.7049	4097.47	0.009202	0.00331645	0.00013364	0.0145229	9.10412	6.87211	0.662503	6.79665	10.029	9.66542	0.10984	6.87211	0.711	4651.46	196.082	671.821	87.0969	2437.45	164.424
2019-02-25	NR1708_T3_02	385.98	598.846	475.114	1079.02	71.9697	351.947	0.20449	0.00499329	0.000255087	0.00124743	0.582117	6.54728	0.797108	3.61887	188.718	7.48085	1.71787	6.54728	0.875206	4916.58	103.107	6445.43	512.612	5326.23	140.877
2019-02-25	NR1708_T3_03	29.5997	420.627	310.904	752.003	47.6923	156.432	0.304875	0.00344069	0.000169039	0.000554453	0.3434	6.80355	0.774265	3.17408	310.739	7.50753	2.91206	6.80355	0.90623	4875.12	90.6049	8793.31	621.956	5830.5	141.62
2019-02-25	NR1708_T3_11	bd	309.705	222.864	513.782	226.154	192.669	1.17379	0.00242675	0.000801572	0.000682891	0.622444	5.66586	0.752501	4.99178	166.614	7.55114	1.60657	5.66586	0.750331	4834.39	142.759	6175.89	435.213	5200.45	142.019
2019-02-25	NR1708_T3_13	56.5899	1187.51	627.849	1451.24	714.423	45959.3	0.0155447	0.00757607	0.00253218	0.162897	39.6774	2.32606	0.531987	2.33644	1.84784	3.2969	0.0252033	2.32606	0.705531	4332.38	68.5319	160.457	7.36832	1062.66	42.5388
2019-02-25	NR1708_T3_14	347.303	4787.68	3774.56	9676.86	1908.33	24925.9	0.0765603	0.0423011	0.00676383	0.0883465	5.0432	4.04059	0.789821	1.25766	21.5838	4.23179	0.198287	4.04059	0.954817	4903.49	35.854	1166.11	85.6324	3165.19	78.9797
2019-02-25	NR1708_T3_15	285.118	1814.36	1493.28	3647.74	207.143	6708.28	0.0308787	0.0161313	0.00073419	0.0237766	3.58673	3.86935	0.830363	2.03553	31.9062	4.3721	0.278806	3.86935	0.88501	4974.73	57.8451	1585.35	107.856	3547.41	82.6334
2019-02-25	NR1708_T3_16	22.9511	1195.88	1007.5	2348.4	46.3235	1412.6	0.0327931	0.0105567	0.000164188	0.00500678	1.2255	4.00694	0.810948	1.88864	91.1983	4.42973	0.815995	4.00694	0.904556	4941.09	53.751	3846.15	228.05	4593.53	85.2966
2019-02-25	NR1708_T3_17	bd	590.497	451.173	1073.58	1.44928	1015.45	0.00142723	0.00490579	5.13676e-06	0.00359912	1.70702	3.0346	0.763517	3.05556	61.6434	4.30642	0.585818	3.0346	0.704669	4855.16	87.3015	2972.44	142.934	4201.11	82.6042
2019-02-25	NR1708_T3_18	201.806	610.967	482.311	1134.55	14.7541	523.919	0.028161	0.0051669	5.22939e-05	0.00185696	0.811385	5.3671	0.803219	3.1224	136.431	6.20928	1.23246	5.3671	0.864368	4927.45	88.9186	5177.14	371.122	4998.85	118.043
2019-02-25	NR1708_T3_19	bd	789.936	282.23	564.405	267.073	41639.3	0.00641398	0.00379562	0.000946605	0.147585	53.8189	3.25048	0.353701	4.93184	0.905748	5.90666	0.0185808	3.25048	0.550307	3723.01	150.109	118.681	7.64025	654.795	55.4661
2019-02-25	NR1708_T3_20	bd	1399.86	1137.85	2848.01	7.40741	2248.05	0.00329504	0.0124908	2.62546e-05	0.0079679	1.58018	5.06022	0.838094	2.41788	73.0956	5.6082	0.632838	5.06022	0.902289	4987.89	68.6706	3160.8	248.019	4371.59	106.56
2019-02-25	NR1708_T3_21	bd	496.731	384.146	892.604	5.88235	2631.13	0.00223568	0.00411315	2.08492e-05	0.00932568	5.33284	4.88967	0.760133	4.83749	19.6443	6.87824	0.187517	4.88967	0.710889	4848.81	138.254	1107.91	98.7864	3074.01	124.907
2019-02-25	NR1708_T3_22	14.5197	603.19	461.49	1158.23	46.6667	5121.08	0.00911266	0.00515548	0.000165404	0.018151	8.69898	3.76692	0.768309	4.5924	12.1723	5.93968	0.114956	3.76692	0.634195	4864.09	131.157	701.466	49.8801	2617.78	105.76
2019-02-25	NR1708_T3_23	107.084	877.03	640.787	1540	371.739	9556.78	0.0388979	0.00709185	0.00131758	0.0338727	11.281	4.79955	0.758181	4.74629	9.26254	6.75004	0.0886444	4.79955	0.711041	4845.14	135.671	547.515	50.1906	2364.32	116.744
2019-02-25	NR1708_T3_24	bd	634.944	464.718	1089.44	121.795	6432.47	0.0189344	0.00507707	0.000431686	0.022799	10.3884	3.48602	0.724311	3.29108	9.60913	4.79412	0.0962616	3.48602	0.727146	4779.72	94.3617	592.463	39.3452	2398.05	84.5597
2019-02-25	NR1708_T3_25	bd	525.65	402.171	946.548	5.68182	842.047	0.00674762	0.00434713	2.01384e-05	0.00298452	1.62752	4.91907	0.79913	4.50298	67.6699	6.66889	0.61443	4.91907	0.737615	4920.19	128.276	3087.72	236.962	4294.37	125.387
2019-02-25	NR1708_T3_26	198.321	1035.11	811.939	1946.44	1467.19	935.333	1.56863	0.00879806	0.00520025	0.00331516	0.826077	3.93304	0.782368	1.99795	130.526	4.41142	1.21054	3.93304	0.891559	4889.97	56.9933	5113.53	271.874	4954.26	85.2256
2019-02-25	NR1708_T3_27	bd	180.412	125.824	300.201	3.33333	1335.45	0.00249603	0.00140648	1.18146e-05	0.00473334	7.23679	4.98681	0.709396	5.30517	13.5098	7.28102	0.138183	4.98681	0.684906	4749.87	152.325	834.379	77.5885	2715.97	129.103
2019-02-25	NR1708_T3_28	20.0599	490.829	374.849	911.167	72.3404	731.488	0.0988949	0.00412095	0.000256401	0.00259266	1.54593	5.08388	0.765622	4.7498	68.2542	6.95747	0.646858	5.08388	0.730708	4859.09	135.684	3215.92	252.444	4302.97	130.494
2019-02-25	NR1708_T3_29	111.275	372.252	107.435	254.65	68.3333	22825.7	0.00299371	0.00170311	0.000242198	0.0809025	63.7581	4.04168	0.342528	8.08333	0.7404	9.03745	0.0156843	4.04168	0.447215	3674.08	246.846	100.323	8.04165	562.639	75.2207
2019-02-25	NR1708_T3_30	bd	442.19	320.849	811.474	280	4061.49	0.0689403	0.00365169	0.000992423	0.0143954	9.26485	4.81914	0.777946	6.48708	11.5722	8.08124	0.107935	4.81914	0.596337	4881.89	185.118	660.743	60.2468	2570.43	140.824
2019-02-25	NR1708_T3_31	383.645	309.231	240.005	473.854	501.515	3236.6	0.154951	0.00237281	0.00177755	0.0114717	10.0803	4.95666	0.757076	6.43838	10.3507	8.12534	0.0992032	4.95666	0.610025	4843.05	184.056	609.738	57.4182	2466.65	140.313
2019-02-25	NR1708_T3_32	bd	554.638	530.041	1457.05	452.308	358.957	1.26006	0.0058949	0.00160314	0.00127228	0.492958	5.64484	0.746185	3.99667	208.613	6.91647	2.02857	5.64484	0.816144	4822.33	114.364	7143.21	469.923	5427.49	130.966
2019-02-25	NR1708_T3_33	91.8584	424.856	301.422	775.227	139.516	202.757	0.688095	0.00348237	0.000494496	0.000718645	0.467367	5.60516	0.783516	3.95021	231.045	6.85726	2.13965	5.60516	0.817405	4892.06	112.673	7375.41	474.584	5530.72	129.97
2019-02-25	NR1708_T3_34	198.981	480.412	362.271	954.015	bd	274.488	bd	0.004167	bd	0.000972885	0.581833	4.62578	0.761005	3.55666	180.258	5.83504	1.71871	4.62578	0.792759	4850.45	101.641	6447.42	366.414	5279.91	111.491
2019-02-25	NR1708_T3_35	201.851	601.779	489.464	1339.02	8.33333	116.675	0.0714233	0.00563639	2.95364e-05	0.00041354	0.178472	6.70092	0.817539	2.82972	631.311	7.2739	5.60311	6.70092	0.921227	4952.6	80.4932	12167.9	694.328	6548.59	137.707
2019-02-25	NR1708_T3_36	175.553	390.412	336.099	855.104	478.333	1910.42	0.250381	0.00366816	0.00169539	0.00677125	4.2987	7.40653	0.783519	4.97552	25.1199	8.92258	0.232629	7.40653	0.830088	4892.07	141.918	1348.26	177.743	3312.89	160.824
2019-02-25	NR1708_T3_37	283.02	821.946	618.559	1462.71	3.67647	257.327	0.0142872	0.0067333	1.30308e-05	0.00091206	0.372273	6.5432	0.813344	4.02389	301.105	7.68148	2.6862	6.5432	0.851815	4945.28	114.499	8409.97	587.177	5798.62	144.664
2019-02-25	NR1708_T3_39	266.324	654.856	517.662	1306.35	7.14286	2115.43	0.00337656	0.00574911	2.53169e-05	0.00749784	3.30338	4.23368	0.808615	3.65275	33.7356	5.59166	0.30272	4.23368	0.757143	4936.99	103.977	1704.78	125.608	3602.34	104.696
2019-02-25	NR1708_T3_40	bd	479.941	308.808	770	10.8333	8175.11	0.00132516	0.00361513	3.83973e-05	0.0289756	16.2125	3.38871	0.652876	4.05217	5.54993	5.28237	0.0616809	3.38871	0.641513	4630.33	117.026	385.84	25.3329	1908.37	87.0541
2019-02-25	NR1708_spots_01	41.2976	181.786	135.846	261.954	12.205	999.295	0.0122136	0.00134421	4.32589e-05	0.00354187	5.7149	7.00485	0.783785	7.5378	18.9014	10.2901	0.174981	7.00485	0.680736	4892.55	214.997	1039.5	133.112	3036.8	181.278
2019-02-25	NR1708_spots_02	267.909	752.53	495.488	1234.06	58.1714	10999.2	0.00528867	0.00575655	0.000206181	0.0389853	13.1834	4.52018	0.718046	6.32472	7.5064	7.77394	0.0758531	4.52018	0.581454	4767.26	181.449	471.323	40.9585	2173.75	130.548
2019-02-25	NR1708_spots_04	281.68	241.196	151.581	411.638	bd	285.158	bd	0.00186564	bd	0.0010107	1.29498	5.92287	0.645099	5.54818	68.6547	8.11558	0.772214	5.92287	0.729815	4613.02	160.369	3688.83	324.435	4308.83	150.687
2019-02-25	NR1708_spots_05	72.3203	398.929	293.703	695.778	bd	1951.63	bd	0.00322007	bd	0.00691728	4.97783	6.81486	0.742716	5.20861	20.5631	8.57741	0.200891	6.81486	0.794513	4815.66	149.09	1180.1	145.33	3118.22	153.843
2019-02-25	NR1708_spots_06	bd	602.368	290.231	745.711	206.491	21568.1	0.00957388	0.00379965	0.000731879	0.0764454	36.4554	3.31705	0.506117	4.12754	1.91335	5.29523	0.0274308	3.31705	0.626422	4259.12	121.56	174.448	11.4078	1085.75	68.2753
2019-02-25	NR1708_spots_07	65.8911	1799.4	1212.89	2929.93	733.607	39831.3	0.0184179	0.0137815	0.00260017	0.141177	21.9662	2.91957	0.66372	1.92672	4.16425	3.49802	0.0455245	2.91957	0.834636	4654.1	55.578	286.986	16.3692	1667.01	55.7237
2019-02-25	NR1708_spots_08	bd	1599.08	1184.16	2909.48	480.117	10875.9	0.0441452	0.0132028	0.00170171	0.038548	6.53924	4.51082	0.779277	2.18258	16.4237	5.0111	0.152923	4.51082	0.900165	4884.33	62.2762	917.327	76.6814	2901.79	91.6589
2019-02-25	NR1708_spots_09	262.949	479.127	373.556	924.65	7.28433	246.19	0.0295882	0.00412208	2.58184e-05	0.000872589	0.516709	5.11497	0.791968	3.76183	211.236	6.34936	1.93532	5.11497	0.805589	4907.36	107.225	6941.61	420.764	5440.12	120.848
2019-02-25	NR1708_spots_12	bd	457.738	289.834	683.817	21.0145	8643.84	0.00243115	0.00331975	7.44831e-05	0.0306369	19.4278	4.08335	0.627667	4.88762	4.45258	6.36887	0.0514727	4.08335	0.641141	4573.39	141.556	323.557	25.7204	1722.18	100.477
2019-02-25	NR1708_spots_13	156.45	889.809	671.917	1693.06	21.3175	3353.22	0.00635734	0.00754867	7.55571e-05	0.011885	4.02232	4.1795	0.752344	2.63075	25.7778	4.93853	0.248612	4.1795	0.846305	4834.09	75.2373	1431.32	106.409	3338.14	92.2265
2019-02-25	NR1708_spots_14	193.584	1200.92	935.763	2362.76	25.0831	1249.47	0.020075	0.0104353	8.89038e-05	0.00442859	1.09797	4.97186	0.804681	2.10047	101.004	5.39734	0.910775	4.97186	0.921167	4930.04	59.8094	4174.11	298.52	4696.16	103.115
2019-02-25	NR1708_spots_15	206.284	889.051	734.606	1789.33	6.2709	981.39	0.00638982	0.00791558	2.22264e-05	0.00347841	1.11411	3.36092	0.799062	2.62513	98.8462	4.26463	0.897581	3.36092	0.788092	4920.07	74.7824	4129.44	201.774	4674.45	82.3093
2019-02-25	NR1708_spots_16	62.2732	214.509	162.737	416.827	45.6165	519.159	0.0878661	0.00184166	0.000161682	0.00184009	2.32634	5.41933	0.790671	5.89818	46.8414	8.00985	0.429861	5.41933	0.676584	4905.02	168.136	2305.09	206.703	3927.39	147.941
2019-02-25	NR1708_spots_18	185.79	271.892	195.023	527.908	bd	408.497	bd	0.00230724	bd	0.00144786	1.42562	5.72968	0.714019	4.88573	69.0261	7.52991	0.701451	5.72968	0.760923	4759.19	140.22	3426.15	297.573	4314.23	140.54
2019-02-25	NR1708_spots_19	436.607	1179.87	913.584	2321.64	1348.54	1479.53	0.911469	0.0102397	0.00477972	0.00524398	1.02305	5.37238	0.795817	1.91687	107.207	5.70411	0.977472	5.37238	0.941844	4914.27	54.6203	4395.29	333.598	4756.1	108.731
2019-02-25	NR1708_spots_20	bd	488.041	390.014	924.878	191.411	281.017	0.681137	0.00418146	0.000678432	0.000996028	0.571403	4.64786	0.815279	3.3515	196.639	5.7302	1.75008	4.64786	0.811117	4948.67	95.3522	6521.38	370.488	5367.76	109.64
2019-02-25	NR1708_spots_21	148.725	255.287	203.447	464.272	bd	207.937	bd	0.00214068	bd	0.000737004	0.930761	6.64934	0.81801	4.77414	121.123	8.18573	1.07439	6.64934	0.812309	4953.42	135.798	4703.74	429.392	4878.94	152.779
2019-02-25	NR1708_spots_22	153.395	317.787	232.659	521.638	430.408	328.245	1.31124	0.00248643	0.00152553	0.00116342	1.05	4.04426	0.761882	4.13808	100.001	5.78617	0.952383	4.04426	0.698952	4852.09	118.247	4312.98	249.461	4686.13	110.144
2019-02-25	NR1708_T3_04	bd	88.9977	40.6184	94.1667	2.17391	28.8627	0.0753191	0.000519009	7.70514e-06	0.0001023	0.338511	11.5255	0.502288	12.4727	204.497	16.9825	2.95412	11.5255	0.67867	4247.94	367.564	8862.26	1024.3	5407.35	295.653	large uncertainty
2019-02-25	NR1708_T3_05	1.40584	171.068	114.887	296.439	2.20588	24.8783	0.0886668	0.00135072	7.81845e-06	8.81779e-05	0.132782	8.31255	0.716324	5.52137	743.49	9.97918	7.53113	8.31255	0.832989	4763.82	158.428	13819.3	882.795	6714.42	184.547	low Pb counts
2019-02-25	NR1708_T3_06	bd	119.048	72.8416	170.729	1.44928	10.202	0.142058	0.000841005	5.13676e-06	3.61596e-05	bd	bd	0.613567	9.75973	bd	bd	bd	bd	bd	4540.46	283.137	bd	bd	bd	bd	large uncertainty
2019-02-25	NR1708_T3_07	125.943	170.241	114.657	322.197	1.49254	29.7611	0.0501505	0.00140801	5.2901e-06	0.000105484	0.172792	9.66769	0.709027	6.04534	565.518	11.4022	5.78732	9.66769	0.847879	4749.12	173.583	12345.2	983.764	6437.03	208.25	low Pb counts
2019-02-25	NR1708_T3_08	bd	101.473	74.6568	168.373	1.44928	70.8892	0.0204442	0.000798989	5.13676e-06	0.000251257	0.578448	9.61792	0.695652	7.56496	165.742	12.2365	1.72876	9.61792	0.786	4721.76	217.502	6471.22	741.292	5195.16	221.089	low Pb counts
2019-02-25	NR1708_T3_09	bd	109.639	73.4662	178.741	INF	482.466	#VALUE!	0.000839212	#VALUE!	0.00171004	4.42345	8.09721	0.614313	8.16241	19.1396	11.4974	0.226068	8.09721	0.704266	4542.22	236.776	1313.86	189.672	3048.88	200.686	low Pb counts
2019-02-25	NR1708_T3_10	524.335	138.348	113.599	252.5	15.7895	404.845	0.0390013	0.00116994	5.59637e-05	0.00143492	3.03384	10.5456	0.904281	10.7371	41.0787	15.0498	0.329616	10.5456	0.700715	5095.58	303.53	1836.52	328.54	3797.07	261.579	large uncertainty
2019-02-25	NR1708_T3_12	162.538	201.172	77.6055	180.417	37.1795	11290.1	0.0032931	0.00106499	0.000131778	0.0400163	53.6397	5.32543	0.38891	9.33871	0.999237	10.7504	0.0186429	5.32543	0.49537	3866.75	281.578	119.073	12.5537	703.423	103.642	low Pb counts
2019-02-25	NR1708_T3_38	bd	119.728	86.8567	213.106	1.44928	93.5176	0.0154974	0.000973369	5.13676e-06	0.000331461	0.681895	7.27248	0.734577	6.93904	148.465	10.0518	1.4665	7.27248	0.723498	4799.89	198.767	5819.83	534.683	5084.09	184.865	low Pb counts
2019-02-25	NR1708_spots_03	94.5409	183.964	80.061	233.245	bd	3913.99	bd	0.00115329	bd	0.0138726	22.4534	4.64021	0.471279	8.60234	2.89269	9.77403	0.0445368	4.64021	0.474749	4153.79	254.876	280.893	25.4579	1380.01	137.721	low Pb counts
2019-02-25	NR1708_spots_10	bd	549.405	164.105	372.984	149.348	37030	0.00403315	0.00251985	0.000529343	0.131248	68.5934	2.71855	0.316851	22.1652	0.636617	22.3313	0.0145787	2.71855	0.121737	3554.61	682.519	93.3017	5.03441	500.21	162.651	large uncertainty
2019-02-25	NR1708_spots_11	494.453	1809.59	1429.56	3282.71	9982.68	13986.5	0.713738	0.0151258	0.0353823	0.0495732	8.82339	10.9876	0.757674	4.94975	11.8346	12.0511	0.113335	10.9876	0.911756	4844.18	141.493	692.088	142.619	2591.4	203.774	large uncertainty
2019-02-25	NR1708_spots_17	bd	359.082	77.159	183.871	39.6704	23729.8	0.00167176	0.0014382	0.000140606	0.0841069	66.3685	3.07313	0.211657	5.25341	0.439519	6.08626	0.0150674	3.07313	0.50493	2918.28	170.088	96.4062	5.87861	369.913	37.0529	low Pb counts
2017-05-08	NR1709A_1_a01	bd	2083.22	1745.29	4279.79	4.91524	288.053	0.0260328	0.0192024	1.43152e-05	0.000838928	0.135872	3.51567	0.828193	1.68101	840.053	3.89689	7.35985	3.51567	0.902174	4971.01	47.7783	13688.6	387.186	6838.25	76.117
2017-05-08	NR1709A_1_a02	93.2746	1881.39	1593.13	3931.71	bd	204.706	bd	0.0175397	bd	0.00059619	0.102641	3.85102	0.845784	1.68634	1135.65	4.20406	9.74273	3.85102	0.916024	5000.86	47.8669	15305.3	435.257	7144.08	81.9055
2017-05-08	NR1709A_1_a03	bd	1885.18	1577.51	3775.21	bd	225.014	bd	0.0171411	bd	0.000655334	0.115588	3.67482	0.838027	1.61293	999.194	4.01321	8.65138	3.67482	0.915681	4987.78	45.8094	14614.7	411.294	7014.21	78.3179
2017-05-08	NR1709A_1_a04	bd	3372.22	2784.93	6688.75	5.84521	1238.13	0.00720244	0.0304222	1.70237e-05	0.00360596	0.332131	3.68261	0.825541	1.14983	342.558	3.85794	3.01086	3.68261	0.954553	4966.45	32.6874	8954.1	346.912	5929.18	75.2586
2017-05-08	NR1709A_1_a05	75.4255	2254.82	1916.91	4551.34	7.26712	835.948	0.0132627	0.0206584	2.11649e-05	0.00243463	0.365843	3.14572	0.844623	2.48682	318.181	4.00996	2.73341	3.14572	0.784475	4998.91	70.5944	8492.01	290.303	5854.45	78.096
2017-05-08	NR1709A_1_a06	320.043	5131.61	4185.99	10753.1	bd	769.332	bd	0.0475324	bd	0.00224061	0.146894	2.43373	0.836539	1.04374	784.852	2.6481	6.80763	2.43373	0.919048	4985.25	29.6468	13248	267.942	6769.32	52.3361
2017-05-08	NR1709A_1_a07	79.6119	2656.28	2270.04	5422.41	bd	277.683	bd	0.0245083	bd	0.000808728	0.103577	2.50667	0.847012	1.21157	1127.02	2.78412	9.65465	2.50667	0.900348	5002.92	34.3873	15252.2	286.392	7136.34	54.9734
2017-05-08	NR1709A_1_a08	23.1272	2411.78	1959.87	4926.65	bd	230.553	bd	0.0220206	bd	0.000671465	0.0924186	2.94827	0.823825	1.67123	1228.52	3.389	10.8203	2.94827	0.869954	4963.49	47.5161	15921.5	338.892	7223.82	66.5382
2017-05-08	NR1709A_1_a09	bd	2626.24	2214.48	5502.56	bd	223.014	bd	0.0244954	bd	0.000649509	0.0785115	3.18088	0.820834	1.58222	1440.88	3.55266	12.737	3.18088	0.89535	4958.32	44.9959	16890.2	369.458	7385.6	69.6517
2017-05-08	NR1709A_1_a10	bd	812.211	648.252	1647.45	3.4227	7598.26	0.000687232	0.00736029	9.96833e-06	0.0221293	9.12656	2.59354	0.786063	2.87264	11.8702	3.87021	0.10957	2.59354	0.67013	4896.69	81.9198	670.252	32.9359	2594.21	70.0177
2017-05-08	NR1709A_1_a11	157.977	846.081	637.002	1547.91	4.30675	8187.47	0.000802504	0.00717814	1.2543e-05	0.0238453	9.48316	3.15157	0.792184	3.58272	11.5127	4.77162	0.10545	3.15157	0.660483	4907.75	102.118	646.27	38.6439	2565.62	85.4571
2017-05-08	NR1709A_1_a12	204.67	2512.92	2129.5	5051.67	7.50386	8195.01	0.00139696	0.022958	2.18544e-05	0.0238673	3.17967	2.56049	0.836203	1.53776	36.2439	2.98678	0.314498	2.56049	0.857277	4984.68	43.6803	1762.8	78.5023	3673.14	57.3739
2017-05-08	NR1709A_1_a13	bd	779.989	617.949	1630.15	8.1529	6086.55	0.00204357	0.00717125	2.37446e-05	0.0177265	7.79872	3.05717	0.775956	2.75172	13.7126	4.11318	0.128226	3.05717	0.743261	4878.23	78.5375	777.738	44.642	2730.06	75.0115
2017-05-08	NR1709A_1_a14	bd	982.023	784.663	1927.63	bd	5499.14	bd	0.00874903	bd	0.0160158	5.72601	3.99402	0.821347	2.29901	19.7688	4.60843	0.174642	3.99402	0.866676	4959.21	65.3776	1037.63	76.1087	3080.12	85.3873
2017-05-08	NR1709A_1_a15	165.935	884.754	702.988	1780.34	5.94136	5368.63	0.00168838	0.00797644	1.73037e-05	0.0156357	6.03189	3.24633	0.808849	2.54418	18.4807	4.1245	0.165785	3.24633	0.787085	4937.4	72.4198	988.848	59.2476	3015.11	76.5035
2017-05-08	NR1709A_1_a16	bd	751.417	536.531	1343.22	6.50955	7469.85	0.00132949	0.00623124	1.89585e-05	0.0217553	9.97826	2.3807	0.743513	2.79362	10.2693	3.67043	0.100218	2.3807	0.648617	4817.2	79.958	615.686	27.8984	2459.34	65.7482
2017-05-08	NR1709A_1_a17	bd	805.454	609.345	1444.79	bd	6195.06	bd	0.00677219	bd	0.0180426	7.76697	2.30353	0.754791	2.48719	13.3931	3.39004	0.12875	2.30353	0.6795	4838.73	71.1163	780.733	33.7874	2707.77	62.121
2017-05-08	NR1709A_1_a18	68.6746	735.134	559.032	1341.66	bd	6226.1	bd	0.00624226	bd	0.018133	8.36927	2.76284	0.769224	2.75247	12.6669	3.89992	0.119485	2.76284	0.708436	4865.79	78.6034	727.597	37.9072	2655.21	70.8715
2017-05-08	NR1709A_1_a19	bd	835.906	665.649	1641.64	bd	5490.09	bd	0.00744385	bd	0.0159894	6.50058	2.65878	0.813927	2.9696	17.256	3.98593	0.153832	2.65878	0.667041	4946.3	84.4958	922.411	45.5408	2949.17	73.7654
2017-05-08	NR1709A_1_a20	10.2619	1122.64	912.552	2226.72	8.0247	6392.82	0.00191507	0.0100932	2.33712e-05	0.0186185	5.76164	2.68149	0.816735	2.31344	19.5362	3.54153	0.173562	2.68149	0.757158	4951.2	65.8113	1031.71	50.928	3068.68	66.2116
2017-05-08	NR1709A_1_a21	102.204	614.434	508.582	1217.43	bd	5269.9	bd	0.00554275	bd	0.0153481	8.70993	2.87193	0.849566	3.25598	13.4428	4.34158	0.114811	2.87193	0.661493	5007.19	92.3953	700.63	38.0211	2711.27	78.9152
2017-05-08	NR1709A_1_a22	2.18942	992.569	820.349	1960.44	4.16897	1863.92	0.00341232	0.00893622	1.21418e-05	0.00542851	1.85948	3.51404	0.818464	2.42891	60.6617	4.27178	0.537785	3.51404	0.822617	4954.21	69.087	2774.17	156.525	4185.07	81.9455
2017-05-08	NR1709A_1_a23	150.438	1072.06	808.046	2042.07	bd	5309.75	bd	0.00928864	bd	0.0154642	4.91484	3.44869	0.789057	1.90621	22.1261	3.94044	0.203466	3.44869	0.875203	4902.11	54.3464	1193.91	74.7377	3189.28	73.812
2017-05-08	NR1709A_1_a24	bd	643.209	447.311	1102.28	4.91524	7489.35	0.00100126	0.00519307	1.43152e-05	0.0218121	11.9601	2.41999	0.704383	2.82193	8.11673	3.71747	0.0836115	2.41999	0.650976	4739.69	81.0641	517.644	24.0294	2244.11	65.0814
2017-05-08	NR1709A_1_a25	bd	1475.79	1194.21	3072.17	4.91524	5138.03	0.00145947	0.0135988	1.43152e-05	0.0149641	3.43637	1.7835	0.815547	1.63093	32.7081	2.41678	0.291005	1.7835	0.737967	4949.13	46.4	1646.55	51.6243	3571.85	46.54
2017-05-08	NR1709B_4_a01	bd	208.129	91.8079	204.708	877.396	9020.1	0.148399	0.00119512	0.00255534	0.0262703	44.9028	7.46689	0.531034	8.20404	1.62988	11.0933	0.0222703	7.46689	0.673101	4329.75	240.673	141.988	20.9384	981.811	130.816
2017-05-08	NR1709B_4_a02	bd	202.818	183.369	357.091	177.384	3324.24	0.0814086	0.00176026	0.000516617	0.00968157	16.3869	8.09176	0.87496	7.02595	7.35864	10.7164	0.0610244	8.09176	0.755084	5048.94	199.015	381.852	59.725	2155.96	175.507
2017-05-08	NR1709B_4_b01	55.8575	85.5341	63.1808	146.771	116.627	1234.27	0.144158	0.000699782	0.000339666	0.00359469	14.7659	7.34608	0.672178	8.68227	6.27379	11.3731	0.0677235	7.34608	0.645919	4672.36	250.225	422.426	59.7956	2014.8	181.897
2017-05-08	NR1709B_4_b04	140.505	2068.01	1703.05	4197.85	190.962	2764.52	0.105384	0.0188723	0.00055616	0.00805142	1.26096	3.77774	0.828152	1.53508	90.5141	4.07772	0.793049	3.77774	0.926435	4970.94	43.6308	3764.18	211.9	4585.97	78.7682
2017-05-08	NR1709B_4_b09	158.322	8383.69	7083.91	17143.1	bd	795.023	bd	0.0772301	bd	0.00231544	0.0947024	4.63357	0.837946	0.910653	1219.44	4.7222	10.5594	4.63357	0.981229	4987.64	25.8639	15777.6	523.844	7216.29	91.563
2017-05-08	NR1709B_4_b10	28.8659	491.094	425.038	1058.7	10.6289	295.729	0.0548329	0.00467687	3.09557e-05	0.000861284	0.585978	5.5257	0.852775	3.89753	200.567	6.76196	1.70655	5.5257	0.817175	5012.54	110.575	6418.53	434.239	5387.75	128.194
2017-05-08	NR1709B_4_b11	bd	739.909	599.007	1410.52	488.157	8307.03	0.0896522	0.00651133	0.00142171	0.0241935	11.1986	3.09134	0.796102	3.17698	9.79736	4.43279	0.0892965	3.09134	0.69738	4914.78	90.5246	551.375	32.59	2415.9	78.5631
2017-05-08	NR1709B_4_b12	105.021	104.413	99.7695	186.156	39.2075	482.976	0.123849	0.000924416	0.000114189	0.00140662	4.07046	8.73454	0.983279	9.26175	33.292	12.7308	0.245673	8.73454	0.686097	5213.67	260.537	1416.12	218.356	3589.29	224.291
2017-05-08	NR1709B_4_b13	46.4458	1652.24	1359.43	3441.84	bd	255.83	bd	0.0152835	bd	0.000745083	0.156516	3.16425	0.828002	2.16153	729.085	3.83206	6.38912	3.16425	0.825731	4970.68	61.4367	12892.9	343.438	6694.58	74.8833
2017-05-08	NR1709B_4_b14	3.41361	120.725	78.9208	236.938	28.1529	222.134	0.193355	0.00103394	8.1993e-05	0.000646947	1.79002	8.08779	0.709328	8.4644	54.6129	11.7072	0.558654	8.08779	0.690839	4749.73	243.036	2861.06	363.309	4080.23	210.144
2017-05-08	NR1709B_4_b15	bd	1123.25	982.562	2340.51	2.81636	202.02	0.0212687	0.01053	8.20241e-06	0.000588366	0.17701	2.87781	0.86657	2.51882	674.701	3.82443	5.64939	2.87781	0.752482	5035.29	71.3895	12212.9	307.767	6615.98	74.7314
2017-05-08	NR1709B_4_b16	224.341	112.915	102.864	199.946	13.9771	449.16	0.0474747	0.000984537	4.0707e-05	0.00130814	3.7191	6.86219	1.05057	7.92109	38.9307	10.4801	0.268882	6.86219	0.65478	5306.59	221.991	1535.13	184.804	3743.86	188.803
2017-05-08	NR1709B_4_b18	14.5479	190.297	58.5199	124.437	1591.27	14347.4	0.169207	0.000883955	0.00463443	0.0417856	74.4009	4.87984	0.305521	8.44921	0.565937	9.75715	0.0134407	4.87984	0.50013	3498.44	261.219	86.0672	8.33866	455.383	69.1981
2017-05-08	NR1709B_T10_04	267.462	4922.05	4148.85	10667.7	bd	207.201	bd	0.0467459	bd	0.000603454	0.0387214	4.17444	0.826376	0.979815	2941.25	4.28789	25.8255	4.17444	0.973542	4967.89	27.8525	21204.5	498.37	8109.79	83.5166
2017-05-08	NR1709B_T10_07	45.3003	209.368	176.693	419.753	bd	163.564	bd	0.00190836	bd	0.000476366	0.785442	5.25434	0.849192	5.19301	149.004	7.38752	1.27317	5.25434	0.711245	5006.57	147.367	5293.63	368.674	5087.74	139.052
2017-05-08	NR1709B_T10_11	102.156	685.903	577.157	1342.82	5.66151	247.709	0.0348689	0.00617136	1.64887e-05	0.000721432	0.362341	4.38673	0.864364	3.02062	328.765	5.32612	2.75983	4.38673	0.823626	5031.68	85.6251	8537.46	402.328	5887.58	102.483
2017-05-08	NR1709B_T10_18	142.065	1420.44	1042.85	2620.06	3.4227	317.656	0.0164384	0.0120386	9.96833e-06	0.000925145	0.224091	6.83838	0.824148	2.58929	506.859	7.31218	4.46248	6.83838	0.935205	4964.05	73.6166	10945.4	682.787	6326.04	138.335
2017-05-08	NR1709B_T10_19	99.9295	2256.36	1863.98	4514.62	5.66151	189.17	0.0456591	0.0204497	1.64887e-05	0.000550942	0.0804859	3.77655	0.823101	1.58523	1409.42	4.09576	12.4245	3.77655	0.922063	4962.24	45.0734	16741.9	435.581	7363.19	79.8895
2017-05-08	NR1709B_T10_20	bd	1794.03	1446.72	3720.72	bd	189.644	bd	0.0164864	bd	0.000552322	0.107538	4.0578	0.817416	1.81203	1047.58	4.44401	9.29905	4.0578	0.913095	4952.39	51.5448	15033.4	455.863	7062.18	86.3806
2017-05-08	NR1709B_T10_21	55.587	56.3313	53.657	83.8117	bd	150.773	bd	0.000458965	bd	0.000439113	2.83154	10.9569	0.934934	9.97318	45.5056	14.8161	0.353165	10.9569	0.739524	5142.65	281.375	1949.69	358.533	3898.64	258.521
2017-05-08	NR1709B_T10_24	36.3789	557.053	484.187	1200.76	bd	225.572	bd	0.00530961	bd	0.000656959	0.404815	4.22144	0.872511	2.90226	297.044	5.12286	2.47026	4.22144	0.82404	5044.97	82.2228	8020.83	376.231	5784.88	98.7254
2017-05-08	NR1709B_T10_26	73.876	294.508	256.84	614.238	2.76828	432.136	0.00977321	0.00276039	8.06239e-06	0.00125856	1.46183	4.3768	0.919122	4.9481	86.6529	6.60606	0.684076	4.3768	0.662543	5118.58	139.743	3359.98	225.236	4542.2	124.649
2017-05-08	NR1709B_T10_29	49.2983	2299.67	1946.9	4798.74	bd	641.671	bd	0.0214215	bd	0.00186881	0.275075	3.19914	0.844322	1.3696	423.022	3.47999	3.63537	3.19914	0.919297	4998.4	38.8804	9886.97	315.625	6142.85	68.1637
2017-05-08	NR1709B_T10_30	34.6112	320.06	286.54	645.107	5.07598	374.708	0.0206669	0.00296434	1.47833e-05	0.0010913	1.10868	6.48415	0.897902	4.58129	111.616	7.9393	0.90197	6.48415	0.816716	5085.57	129.565	4144.34	384.738	4796.65	148.404
2017-05-08	NR1709B_T10_31	190.691	3168.74	2608.04	6438.7	4.91525	812.118	0.00923366	0.0289292	1.43152e-05	0.00236522	0.262915	3.30667	0.823045	1.12218	431.433	3.4919	3.8035	3.30667	0.946955	4962.15	31.9075	10116.7	329.03	6162.79	68.3924
2017-05-08	NR1709B_T10_32	bd	369.118	307.31	746.648	3.4227	380.276	0.0137315	0.00337019	9.96833e-06	0.00110752	0.991628	5.37919	0.875877	4.2852	121.731	6.8774	1.00844	5.37919	0.782155	5050.43	121.374	4495.47	339.143	4883.98	129.857
2017-05-08	NR1709B_4_a03	46.1683	57.8173	47.7996	106.636	47.3837	542.39	0.13328	0.000502667	0.000138001	0.00157966	9.70772	11.2026	0.786963	32.2731	11.1723	34.1621	0.103011	11.2026	0.327925	4898.32	920.27	632.029	133.495	2537.61	494.295	large uncertainty
2017-05-08	NR1709B_4_a04	159.069	55.0529	61.4617	102.326	5.07598	181.418	0.0426861	0.000518268	1.47833e-05	0.000528365	3.24705	8.90345	1.3983	16.5306	59.3497	18.7758	0.307972	8.90345	0.474198	5704.24	456.471	1730.72	264.771	4163.23	319.13	large uncertainty
2017-05-08	NR1709B_4_a05	bd	53.881	53.0221	87.5668	4.30675	207.476	0.0316687	0.000460552	1.2543e-05	0.000604255	3.79586	13.3375	0.902886	37.3512	32.7815	39.661	0.263445	13.3375	0.336287	5093.4	1055.99	1507.44	348.939	3574.06	579.614	large uncertainty
2017-05-08	NR1709B_4_a06	bd	41.381	42.6108	97.7086	22.7072	389.641	0.0889094	0.00043031	6.61329e-05	0.0011348	9.41808	13.6922	0.849045	26.8692	12.4244	30.1567	0.106179	13.6922	0.454034	5006.32	762.499	650.517	167.258	2637.02	450.358	large uncertainty
2017-05-08	NR1709B_4_a07	26.98	129.185	33.3077	67.4053	610.635	8351.6	0.111547	0.000544454	0.00177842	0.0243233	64.2025	5.84712	0.25968	12.2641	0.557432	13.5867	0.0155757	5.84712	0.430358	3244.76	386.477	99.6336	11.5515	449.854	94.2422	large uncertainty
2017-05-08	NR1709B_4_a08	21.1176	50.5096	40.9015	88.944	154.454	1555.45	0.151492	0.000427124	0.000449833	0.00453012	28.5663	11.4423	0.833602	24.4147	4.02171	26.963	0.0350062	11.4423	0.42437	4980.26	693.641	221.805	49.7037	1638.59	364.507	large uncertainty
2017-05-08	NR1709B_4_b02	bd	195.059	44.4953	119.713	1513.01	14238.9	0.162111	0.000850832	0.00440651	0.0414697	68.8907	4.47562	0.240893	10.2995	0.481914	11.2299	0.0145158	4.47562	0.398544	3125.88	327.67	92.9019	8.25095	399.385	71.579	large uncertainty
2017-05-08	NR1709B_4_b03	bd	83.9208	64.2919	140.483	39.2075	733.548	0.0815434	0.000683701	0.000114189	0.0021364	8.29015	9.54186	1.11238	22.07	18.4926	24.0444	0.120625	9.54186	0.396844	5386.58	616.585	734.161	131.08	3015.72	381.624	large uncertainty
2017-05-08	NR1709B_4_b05	bd	80.4436	77.6156	167.406	35.076	765.459	0.0699094	0.00077078	0.000102156	0.00222933	9.56079	8.93568	1.13977	20.6505	16.4297	22.5009	0.104594	8.93568	0.397126	5420.54	576.175	641.274	108.176	2902.14	359.049	large uncertainty
2017-05-08	NR1709B_4_b06	17.4254	150.895	45.1203	103.913	660.468	10764	0.0936104	0.000710303	0.00192356	0.0313493	71.5456	5.11163	0.373417	11.158	0.719311	12.2731	0.0139771	5.11163	0.416489	3805.34	337.77	89.4783	9.07801	550.26	99.2607	large uncertainty
2017-05-08	NR1709B_4_b07	74.0562	144.741	45.211	98.944	774.701	10676	0.110707	0.000684175	0.00225625	0.0310929	74.5377	5.88919	0.369447	10.4982	0.683097	12.0373	0.013416	5.88919	0.489247	3789.16	318.134	85.9103	10.0439	528.645	94.6586	large uncertainty
2017-05-08	NR1709B_4_b08	bd	79.5817	67.4641	147.406	26.6755	391.667	0.103907	0.000697333	7.76901e-05	0.0011407	5.06427	8.81598	1.0279	12.454	27.973	15.2586	0.197462	8.81598	0.577773	5276.01	349.453	1161.67	184.757	3418.15	262.204	large uncertainty
2017-05-08	NR1709B_4_b17	bd	56.2248	47.3078	110.588	77.4693	777.058	0.152098	0.000507088	0.000225623	0.00226311	13.4875	11.125	1.12553	17.2363	11.5009	20.5148	0.0741429	11.125	0.542294	5402.99	481.237	461.067	98.2525	2564.65	325.178	large uncertainty
2017-05-08	NR1709B_4_b19	130.835	82.0061	65.4031	135.588	68.9223	833.947	0.126086	0.000670205	0.00020073	0.0024288	9.79901	8.56348	1.15782	12.7674	16.2842	15.3734	0.102051	8.56348	0.557034	5442.45	355.93	626.418	101.436	2893.63	258.306	large uncertainty
2017-05-08	NR1709B_4_b20	148.879	135.913	48.2602	91.6479	1010.82	11210.4	0.137562	0.00065321	0.00294392	0.0326494	80.8214	5.62297	0.384997	10.2314	0.656503	11.6747	0.012373	5.62297	0.481637	3851.49	308.795	79.2718	8.85419	512.473	89.865	large uncertainty
2017-05-08	NR1709B_4_b21	68.243	66.6635	60.1203	108.675	48.9339	635.327	0.117506	0.000557624	0.000142516	0.00185034	9.73857	9.73317	0.80326	22.5446	11.3676	24.556	0.102685	9.73317	0.396367	4927.53	642.016	630.122	115.811	2553.77	378.265	large uncertainty
2017-05-08	NR1709B_T10_01	8.22647	72.4328	62.3079	129.125	bd	17.575	bd	0.000624897	bd	5.11856e-05	0.294987	15.9326	0.703596	22.9278	328.721	27.9201	3.38998	15.9326	0.570649	4738.08	658.688	9536.34	1418.16	5887.44	449.382	large uncertainty
2017-05-08	NR1709B_T10_02	bd	1755.67	1520.26	3642.03	4.16897	166.706	0.0381527	0.0163834	1.21418e-05	0.000485518	0.139944	10.3795	0.694113	8.13422	683.568	13.1871	7.14571	10.3795	0.787096	4718.58	233.904	13521.3	1078.47	6629.22	237.369	large uncertainty
2017-05-08	NR1709B_T10_03	bd	33.9339	35.3078	49.1513	bd	23.4119	bd	0.000280383	bd	6.81852e-05	0.468164	17.9054	0.591152	32.6166	174.023	37.2081	2.136	17.9054	0.481223	4486.4	948.871	7367.93	1407.02	5244.37	562.354	large uncertainty
2017-05-08	NR1709B_T10_05	bd	24.7403	18.4188	37.2465	3.4227	28.071	0.18602	0.00019042	9.96833e-06	8.17544e-05	1.9266	46.8668	0.215369	53.5619	15.4063	71.1715	0.51905	46.8668	0.658506	2946.39	1729.92	2695.15	1791.11	2840.7	861.782	large uncertainty
2017-05-08	NR1709B_T10_06	bd	18.4524	17.3077	29.502	bd	25.6287	bd	0.000154556	bd	7.46414e-05	1.49977	25.6339	0.217401	62.9106	19.9775	67.9326	0.666768	25.6339	0.377343	2961.54	2029.21	3293.39	1202.6	3090.27	843.018	large uncertainty
2017-05-08	NR1709B_T10_08	46.2974	38.2019	34.339	42.4052	bd	145.783	bd	0.00027222	bd	0.00042458	3.6444	16.0558	0.577736	27.1342	21.8479	31.5286	0.274394	16.0558	0.509245	4452.98	790.761	1563.07	430.975	3176.99	479.119	large uncertainty
2017-05-08	NR1709B_T10_09	bd	35.8942	37.1562	65.8902	bd	129.956	bd	0.000329045	bd	0.000378486	3.52746	13.6877	0.511714	34.8885	19.9927	37.4774	0.28349	13.6877	0.365226	4275.31	1026.57	1608.92	378.455	3091	547.026	large uncertainty
2017-05-08	NR1709B_T10_10	bd	28.2019	35.0497	75.3419	bd	67.6793	bd	0.000328223	bd	0.00019711	2.6828	25.1564	0.0231815	994.099	1.19086	994.417	0.372745	25.1564	0.0252976	bd	bd	2042.3	825.494	796.357	2506.97	large uncertainty
2017-05-08	NR1709B_T10_12	25.8161	20.8514	24.339	18.9924	4.91524	124.398	0.0602808	0.000152	1.43152e-05	0.000362299	5.78268	21.4576	0.390571	52.2471	9.30844	56.4817	0.17293	21.4576	0.379903	3873.17	1574.69	1028.24	395.491	2368.85	713.939	large uncertainty
2017-05-08	NR1709B_T10_13	131.213	12.8653	14.3846	3.34258	25.0882	622.23	0.0615129	7.24504e-05	7.30673e-05	0.00181219	48.3293	34.4335	0.119157	189.322	0.339794	192.427	0.0206914	34.4335	0.178943	1943.63	6770.65	132.024	89.3738	297.016	691.581	large uncertainty
2017-05-08	NR1709B_T10_14	33.4369	15.1249	13.4367	10.3738	28.3799	513.479	0.0843211	9.22087e-05	8.2654e-05	0.00149546	34.0474	33.7643	bd	bd	bd	bd	0.0293708	33.7643	bd	bd	bd	186.609	123.027	bd	bd	large uncertainty
2017-05-08	NR1709B_T10_15	40.4034	25.2706	23.2452	36.1552	12.1914	301.292	0.0617323	0.000200521	3.55063e-05	0.000877487	12.9163	20.1563	0.445137	38.0228	4.74966	43.035	0.0774217	20.1563	0.46837	4069.04	1132.2	480.715	184.086	1776.05	545.343	large uncertainty
2017-05-08	NR1709B_T10_16	bd	28.2019	23.8157	43.5591	10.1752	270.231	0.0574456	0.000226348	2.96345e-05	0.000787025	10.6392	16.9952	0.654275	28.2082	8.47533	32.9323	0.0939918	16.9952	0.516065	4633.42	814.522	579.102	185.56	2283.28	470.315	large uncertainty
2017-05-08	NR1709B_T10_17	bd	39.6646	30.9441	59.5928	32.1914	929.976	0.05281	0.000308349	9.37547e-05	0.00270848	24.0575	22.0521	0.352509	42.0915	2.01941	47.5184	0.0415671	22.0521	0.464076	3717.87	1281.57	262.539	112.478	1122.06	499.588	large uncertainty
2017-05-08	NR1709B_T10_22	bd	50.0389	41.0578	79.7131	5.66151	167.915	0.0514387	0.000404519	1.64887e-05	0.000489039	3.67764	17.1205	0.391643	59.3819	14.6766	61.8006	0.271913	17.1205	0.277028	3877.3	1789.26	1550.51	455.414	2794.51	780.623	large uncertainty
2017-05-08	NR1709B_T10_23	bd	32.8173	24.768	55.6865	7.38367	155.783	0.0723103	0.000268255	2.15043e-05	0.000453704	4.28929	14.6375	0.331168	44.9067	10.6407	47.232	0.233139	14.6375	0.309907	3622.5	1376.21	1350.93	347.271	2492.26	632.027	large uncertainty
2017-05-08	NR1709B_T10_25	bd	28.4903	18.8462	19.7489	10.9817	219.63	0.0762827	0.000158875	3.19832e-05	0.000639652	7.43249	15.1533	0.399466	35.1434	7.40716	38.2712	0.134544	15.1533	0.395945	3907.07	1056.92	813.739	227.619	2161.84	523.371	large uncertainty
2017-05-08	NR1709B_T10_27	bd	49.7404	45.5045	91.6242	3.4227	164.478	0.0317475	0.000442551	9.96833e-06	0.000479027	3.52788	13.3626	0.771229	43.5415	30.1284	45.5458	0.283457	13.3626	0.293389	4869.51	1243.22	1608.75	369.686	3491.01	641.875	large uncertainty
2017-05-08	NR1709B_T10_28	12.4585	51.0283	46.2308	92.8023	bd	116.552	bd	0.000450111	bd	0.000339448	1.9003	13.6757	0.803504	23.8596	58.2737	27.501	0.526234	13.6757	0.497279	4927.96	679.45	2725.56	580.95	4144.96	438.913	large uncertainty
2017-05-08	NR1709B_T10_33	41.7456	44.9676	48.7594	77.0828	bd	345.729	bd	0.000404519	bd	0.00100691	7.71716	13.1169	0.546846	38.382	9.76592	40.5615	0.129581	13.1169	0.323384	4372.74	1123.34	785.476	191.139	2412.94	559.997	large uncertainty
2017-05-08	NR1709B_T10_34	75.9664	56.7101	45.5167	93.1868	bd	154.56	bd	0.000462787	bd	0.000450141	2.68882	11.6101	0.62057	12.5846	31.8079	17.1221	0.37191	11.6101	0.678076	4556.91	364.783	2038.38	393.525	3544.37	291.095	large uncertainty
2017-05-08	NR1709B_T10_35	bd	43.4705	35.8792	108.175	13.858	747.923	0.0282678	0.000444103	4.03604e-05	0.00217826	15.1549	10.3488	0.635608	26.2075	5.78017	28.1767	0.0659851	10.3488	0.367281	4591.59	758.332	411.922	82.0662	1943.45	398.361	large uncertainty
2019-05-08	NR1901Vein_T1_01	56.7111	395.623	61.1342	118.63	5125.74	34149.5	0.150097	0.000763717	0.0106773	0.071136	90.4216	3.15347	0.152187	7.4035	0.231959	8.04712	0.0110593	3.15347	0.391875	2370.65	252.544	70.9015	4.44568	211.815	30.3122
2019-05-08	NR1901Vein_T1_02	3.22403	456.676	53.3939	79.1404	7095.52	45001.5	0.157673	0.000782064	0.0147805	0.0937413	100.721	2.57385	0.115799	7.37621	0.158449	7.81238	0.0099284	2.57385	0.329458	1892.35	265.405	63.6869	3.26144	149.345	21.4712
2019-05-08	NR1901Vein_T1_03	bd	394.988	131.409	264.662	3222.88	27492.6	0.117227	0.00104998	0.0067135	0.0572691	69.9366	4.33717	0.342454	5.43504	0.674845	6.95347	0.0142987	4.33717	0.623742	3673.76	165.977	91.5223	7.87805	523.654	55.3602
2019-05-08	NR1901Vein_T1_06	36.9355	1475.9	1226.35	2962.78	370.002	2565.15	0.144242	0.00751925	0.000770741	0.0053434	1.70658	5.73409	0.811422	1.78596	65.5279	6.00578	0.585967	5.73409	0.954761	4941.92	50.8271	2973.05	267.516	4262.19	113.539
2019-05-08	NR1901Vein_T1_08	13.7566	1583.59	1260.23	3092.89	838.556	12213.6	0.0686575	0.00787984	0.00174677	0.0254418	7.94608	2.53227	0.798229	1.49554	13.8446	2.94092	0.125848	2.53227	0.861046	4918.58	42.6064	764.137	36.3914	2739.13	54.2259
2019-05-08	NR1901Vein_T1_11	174.711	839.235	61.236	99.8265	18223.7	83930.3	0.217129	0.0013277	0.0379612	0.174833	103.341	2.26198	0.0733122	7.22215	0.0977711	7.5681	0.00967673	2.26198	0.298884	1022.59	292.334	62.0803	2.7944	94.7168	13.5967
2019-05-08	NR1901Vein_T1_12	d	1237.58	84.931	125.166	23193.4	121072	0.191567	0.00192152	0.0483135	0.252202	103.48	2.46516	0.0700178	9.68629	0.0932518	9.99506	0.00966369	2.46516	0.246638	928.874	397.752	61.9971	3.04129	90.5281	17.1675
2019-05-08	NR1901Vein_T1_13	12.9896	536.224	55.078	140.019	20813.9	54910.6	0.379051	0.000970688	0.0433569	0.114383	102.158	2.42916	0.0913355	9.50335	0.123218	9.8089	0.0097888	2.42916	0.247649	1453.61	361.609	62.7958	3.0353	117.985	21.6202
2019-05-08	NR1901Vein_T1_18	98.5793	582.846	432.408	1037.82	875.077	11677.2	0.0749386	0.00272506	0.00182285	0.0243246	20.9578	6.66535	0.742941	5.04518	4.88556	8.35947	0.0477149	6.66535	0.797341	4816.09	144.409	300.477	39.0182	1799.77	131.959
2019-05-08	NR1901Vein_T1_19	39.9031	960.957	768.191	1805.52	1039.27	5215.29	0.199274	0.00469159	0.00216488	0.0108638	5.02228	9.92057	0.784703	3.64227	21.5333	10.5681	0.199113	9.92057	0.938732	4894.22	103.879	1170.55	208.961	3162.91	186.801
2019-05-08	NR1901Vein_T1_25	177.318	5186.73	4336.67	10952.5	1149.27	2160.85	0.531861	0.0271779	0.00239401	0.0045012	0.428094	4.555	0.827689	1.00382	266.462	4.6643	2.33594	4.555	0.976567	4970.15	28.5321	7766.34	398.641	5674.95	90.2358
2019-05-08	NR1901Vein_T1_26	bd	470.126	57.1235	130.596	8943.02	46993	0.190305	0.000873164	0.018629	0.0978899	102.42	2.73597	0.118958	6.92672	0.160071	7.44749	0.0097637	2.73597	0.367369	1940.63	247.806	62.6356	3.40989	150.765	20.6573
2019-05-08	NR1901Vein_T1_29	304.055	5396.6	4519.43	11244.1	905.52	5521.86	0.163988	0.028086	0.00188626	0.0115024	1.06176	3.09654	0.829819	1.0098	107.712	3.25703	0.941833	3.09654	0.950725	4973.8	28.6973	4278.05	190.785	4760.83	63.5063
2019-05-08	NR1901Vein_T1_38	103.159	4524.51	3545.51	8082.52	3522.95	54414.4	0.0647431	0.0214394	0.00733857	0.113349	12.7186	3.11277	0.78005	2.86005	8.45257	4.2272	0.0786249	3.11277	0.736367	4885.74	81.6014	487.91	29.1878	2280.84	73.9998
2019-05-08	NR1901Vein_T1_39	321.918	6553.57	5539.99	13663.3	517.789	7782.32	0.066534	0.0341873	0.00107859	0.0162111	1.12487	6.93222	0.847895	1.27132	103.883	7.04783	0.888993	6.93222	0.983596	5004.4	36.0809	4100.2	407.465	4724.42	132.699
2019-05-08	NR1901Vein_T1_40	108.176	1112.33	570.603	1317.86	2220.24	46705.7	0.0475367	0.00398298	0.00462492	0.0972915	44.8342	4.00665	0.516944	2.94462	1.58906	4.97233	0.0223044	4.00665	0.80579	4290.27	86.5716	142.203	11.2606	965.929	60.1575
2019-05-08	NR1901Vein_T1_42	21.3337	600.346	158.056	326.269	2876.77	44969.2	0.0639719	0.00143969	0.00599252	0.0936742	77.6895	3.53539	0.24981	9.4648	0.443153	10.1035	0.0128717	3.53539	0.349916	3183.56	299.714	82.4471	5.78994	372.473	61.1274
2019-05-08	NR1901Vein_T1_43	bd	384.746	71.4775	118.045	2175.59	37118	0.0586126	0.000762232	0.0045319	0.0773196	98.7585	3.71446	0.187547	9.34474	0.261723	10.0559	0.0101257	3.71446	0.369381	2720.77	307.983	64.9463	4.79879	236.054	41.5005
2019-05-08	NR1901Vein_T1_44	bd	766.526	478.06	1381.76	3836.77	19126.9	0.200596	0.00348597	0.00799227	0.0398426	26.0037	9.56685	0.576592	8.50897	3.05591	12.8034	0.0384561	9.56685	0.747212	4450.09	248.011	243.256	45.5156	1421.71	179.129
2019-05-08	NR1901Vein_T1_45	46.2371	2957.23	2113.18	5018.63	11015.1	36697.8	0.300156	0.0133913	0.0229452	0.0764443	12.9067	5.49632	0.703669	3.19976	7.51378	6.35987	0.077479	5.49632	0.864218	4738.23	91.9244	481.058	50.7557	2174.63	108.028
2019-05-08	NR1901Vein_T1_46	610.102	11090.7	9028.61	22971.2	10217.5	12529.8	0.815452	0.0571943	0.0212837	0.0261005	1.21983	8.95242	0.807054	1.16288	91.1823	9.02763	0.819788	8.95242	0.991669	4934.24	33.1059	3859.6	500.053	4593.36	166.85
2019-05-08	NR1901Vein_T1_48	19.456	303.256	200.099	513.769	2418.02	8662.41	0.279139	0.00135004	0.00503691	0.0180444	27.747	7.00234	0.645996	7.42939	3.20863	10.2092	0.0360399	7.00234	0.685882	4615.03	214.723	228.24	31.3287	1459.24	146.905
2019-05-08	NR1901Vein_T1_51	bd	485.865	295.859	722.736	2115.94	16840.5	0.125646	0.00199688	0.00440765	0.0350801	34.7391	4.74472	0.595372	3.42288	2.36197	5.85051	0.028786	4.74472	0.810992	4496.74	99.5239	182.946	17.0938	1231.18	80.2171
2019-05-08	NR1901Vein_T1_54	bd	1191.56	795.368	2000.62	25381.4	32973.7	0.769748	0.00529271	0.0528713	0.0686865	28.1336	2.30296	0.657193	2.48286	3.21939	3.38647	0.0355447	2.30296	0.680046	4639.84	71.6709	225.158	10.1835	1461.84	51.1616
2019-05-08	NR1901Vein_T1_56	93.5035	2790.09	2139.62	5258.77	27807.2	34984.9	0.794833	0.0135233	0.0579243	0.0728761	13.2668	2.8903	0.760057	1.57524	7.8956	3.29169	0.0753761	2.8903	0.87806	4848.67	45.0203	468.464	26.0667	2219.18	57.6632
2019-05-08	NR1901Vein_T1_58	47.2368	1406.56	1117.26	2892.13	1509.98	2034.91	0.74204	0.00718865	0.00314541	0.00423886	1.52385	7.36887	0.794124	2.06663	71.821	7.65318	0.656231	7.36887	0.96285	4911.23	58.8957	3252.5	365.85	4353.97	142.761
2019-05-08	NR1901Vein_T1_59	759.527	14571.1	12767.6	30110	1570.52	3216.68	0.488243	0.0762521	0.00327151	0.00670057	0.211075	6.38339	0.831507	4.67203	542.92	7.91047	4.73766	6.38339	0.806955	4976.68	132.757	11262.2	646.077	6395.7	148.88
2019-05-08	NR1901Vein_T1_60	445.045	5216.77	4632.06	10138.8	1586.04	3998.77	0.396631	0.0265297	0.00330383	0.00832973	0.802929	3.10707	0.868614	3.52018	149.092	4.69527	1.24544	3.10707	0.661745	5038.63	99.7561	5214.51	218.445	5088.34	90.5541
2019-05-08	NR1901Vein_T1_61	527.397	15759.3	14262.1	27945.7	8159.8	11986.5	0.680751	0.0769403	0.0169974	0.0249687	0.762471	6.55452	0.877015	8.08563	158.522	10.4086	1.31153	6.55452	0.629721	5052.26	228.998	5401.5	462.482	5150.21	190.92
2019-05-08	NR1901Vein_T1_62	126.03	2228.45	1891.73	5309.08	4200.83	6263.92	0.670639	0.0125155	0.00875064	0.0130482	2.89708	3.20226	0.839912	3.876	39.9557	5.02771	0.345175	3.20226	0.636923	4990.97	110.068	1911.52	105.08	3769.6	95.02
2019-05-08	NR1901Vein_T1_63	159.699	376.709	144.263	335.724	16432.6	19639.8	0.836699	0.0011371	0.0342303	0.0409111	55.6342	5.49909	0.387696	8.99263	0.960407	10.5407	0.0179746	5.49909	0.521698	3862.03	271.225	114.842	12.5066	683.507	99.7983
2019-05-08	NR1901Vein_T1_64	114.811	465.353	66.6929	149.411	23048	42785.8	0.538683	0.000904503	0.0480106	0.089126	94.9148	3.30007	0.132904	8.12987	0.192979	8.77413	0.0105358	3.30007	0.376113	2136.69	284.384	67.5626	4.43441	179.168	28.4216
2019-05-08	NR1901Vein_T2_02	192.545	536.512	198.382	542.134	15643.7	35152.5	0.445024	0.00169501	0.032587	0.0732252	66.5135	2.65828	0.365589	5.40633	0.757511	6.02453	0.0150345	2.65828	0.441244	3773.24	164.003	96.1976	5.07444	572.573	51.4083
2019-05-08	NR1901Vein_T2_03	7.90164	719.363	320.76	810.019	10939.3	30733.5	0.35594	0.00245571	0.0227873	0.06402	47.8638	5.40309	0.480159	5.24535	1.38256	7.53041	0.0208926	5.40309	0.717502	4181.42	155.165	133.295	14.2404	881.53	85.0742
2019-05-08	NR1901Vein_T2_05	bd	634.582	376.185	922.035	7805.52	19040.1	0.409951	0.00256542	0.0162595	0.039662	31.7	3.85063	0.566902	4.03682	2.46464	5.57882	0.0315457	3.85063	0.690222	4425.37	117.815	200.215	15.1642	1261.73	77.5545
2019-05-08	NR1901Vein_T2_06	bd	841.457	636.214	1517.78	3988.29	10703.4	0.372621	0.00397588	0.00830791	0.0222959	13.0691	4.18712	0.729542	2.5035	7.69326	4.87847	0.0765163	4.18712	0.858285	4790.03	71.7454	475.295	38.2567	2195.81	84.0936
2019-05-08	NR1901Vein_T2_07	217.483	3839.47	3204.6	7816.78	2649.27	7848.52	0.33755	0.0197249	0.00551862	0.016349	1.91975	9.03446	0.813288	1.79713	58.3856	9.21147	0.520901	9.03446	0.980784	4945.19	51.1374	2703	387.08	4146.88	169.03
2019-05-08	NR1901Vein_T2_08	450.665	8543.12	6078.25	17671.6	1976.1	4179.37	0.472822	0.0428628	0.00411636	0.00870594	0.576446	6.12686	0.824375	1.0497	197.093	6.21613	1.73477	6.12686	0.985639	4964.44	29.8437	6485.39	482.559	5370.1	118.416
2019-05-08	NR1901Vein_T2_09	44.1992	754.512	319.827	897.519	16514.3	44736.5	0.369145	0.00261726	0.0344004	0.0931894	60.6309	2.33221	0.428757	2.50057	0.974592	3.41937	0.0164932	2.33221	0.682059	4013.12	74.7111	105.455	4.877	690.828	33.7072
2019-05-08	NR1901Vein_T2_17	bd	294.763	207.124	521.804	4965.4	6536.6	0.75963	0.00135875	0.0103433	0.0136162	22.5369	6.99429	0.696844	5.5641	4.26136	8.93752	0.0443717	6.99429	0.782576	4724.22	159.956	279.874	38.1993	1685.93	137.289
2019-05-08	NR1901Vein_T2_18	207.856	2149.24	1639.87	3895.68	12711.5	18672.3	0.680765	0.0102001	0.0264789	0.0388958	9.54026	4.39719	0.757031	2.05874	10.936	4.85528	0.104819	4.39719	0.905653	4842.97	58.8541	642.588	53.5633	2517.7	86.5435
2019-05-08	NR1901Vein_T2_19	41.9069	422.66	352.448	892.241	1032.6	1519.01	0.679789	0.00221309	0.00215099	0.0031642	3.70366	6.31348	0.809238	2.90212	30.1128	6.94855	0.270003	6.31348	0.908604	4938.08	82.6062	1540.82	170.772	3490.5	128.137
2019-05-08	NR1901Vein_T2_20	156.165	3904.14	3129.4	7824.59	12523.1	20340.4	0.615676	0.0197213	0.0260865	0.0423705	5.17435	3.28891	0.79734	1.17683	21.237	3.49311	0.193261	3.28891	0.941541	4916.99	33.5291	1139.02	68.3133	3149.47	65.5826
2019-05-08	NR1901Vein_T2_21	29.9448	298.489	141.602	336.269	10300.5	16902.7	0.609401	0.00103047	0.0214567	0.0352095	59.3474	6.63921	0.416842	9.27431	0.968002	11.4058	0.0168499	6.63921	0.582092	3970.97	277.811	107.717	14.1687	687.433	107.979
2019-05-08	NR1901Vein_T2_23	133.833	334.565	214.396	433.835	3605.22	4609.28	0.782165	0.00130447	0.00750994	0.00960147	16.8366	4.96838	0.639923	5.10696	5.23816	7.12502	0.0593943	4.96838	0.697315	4601.37	147.701	371.941	35.8132	1858.85	114.761
2019-05-08	NR1901Vein_T2_24	466.772	5732.59	4796.38	11873.4	2940.94	8450.77	0.348008	0.0297349	0.00612619	0.0176036	1.31671	7.158	0.829837	1.0274	86.8577	7.23136	0.759468	7.158	0.989856	4973.83	29.1975	3642.3	386.53	4544.57	135.696
2019-05-08	NR1901Vein_T2_25	89.7612	4491.18	3725.19	9301.42	5021.89	15354.4	0.327066	0.0232515	0.010461	0.0319843	3.55119	5.95959	0.811122	1.32575	31.4788	6.10527	0.281596	5.95959	0.976138	4941.39	37.7308	1599.39	166.653	3534.13	113.571
2019-05-08	NR1901Vein_T2_26	170.691	2815.9	2397.92	6063.62	2639.27	6912.1	0.381833	0.0149686	0.00549779	0.0143984	2.42673	6.89059	0.821118	1.3354	46.6325	7.0188	0.412076	6.89059	0.981734	4958.81	37.9758	2224.41	254.176	3922.95	130.751
2019-05-08	NR1901Vein_T2_27	2043.91	40208.6	33916.8	83060.1	26444	17615	1.50122	0.208634	0.0550848	0.0366933	0.483237	4.69905	0.838704	0.503806	239.196	4.72598	2.06938	4.69905	0.994302	4988.93	14.308	7229.49	396.04	5565.78	91.3398
2019-05-08	NR1901Vein_T2_28	583.199	10358.6	8381.58	20800.6	6388.93	16361.1	0.390494	0.0524828	0.0133086	0.0340814	1.67433	5.89343	0.815993	0.946265	67.1664	5.96891	0.597255	5.89343	0.987354	4949.91	26.9203	3018.77	278.037	4286.9	112.918
2019-05-08	NR1901Vein_T2_29	398.478	4068.13	3353.76	8092.7	4692.13	14294.7	0.328242	0.0205927	0.00977404	0.029777	3.37567	6.33923	0.82026	1.62544	33.4886	6.5443	0.296237	6.33923	0.968664	4957.33	46.227	1672.62	184.129	3595.1	121.48
2019-05-08	NR1901Vein_T2_31	92.4409	1626.47	1328.78	3198.7	1311.77	2441.69	0.537238	0.00816819	0.00273251	0.00508623	1.59113	6.27096	0.8594	2.73646	74.4383	6.84202	0.628486	6.27096	0.916537	5023.51	77.5976	3143.6	304.712	4389.82	128.604
2019-05-08	NR1901Vein_T2_33	176.765	3147.78	2387.03	6527.83	6756.62	7716.09	0.875654	0.0160108	0.0140745	0.0160732	2.73112	9.1629	0.830121	1.72626	41.8896	9.3241	0.36615	9.1629	0.982712	4974.32	49.0573	2011.26	309.092	3816.45	169.895
2019-05-08	NR1901Vein_T2_34	86.4646	4070.07	3359.4	8578.25	5539.51	11463.4	0.483237	0.0212472	0.0115392	0.023879	2.91863	3.18847	0.813555	0.811193	38.4162	3.29004	0.342627	3.18847	0.969127	4945.65	23.082	1899.29	104.061	3730.7	63.115
2019-05-08	NR1901Vein_T2_35	479.915	9331.74	7711.9	19935	3045.32	4135.76	0.736339	0.0490821	0.00634363	0.0086151	0.557535	5.35782	0.818899	1.16373	202.425	5.48274	1.79361	5.35782	0.977215	4954.97	33.0995	6622.62	428.914	5397.06	105.156
2019-05-08	NR1901Vein_T2_37	540.023	10314.9	8398.54	20336.7	4771.77	3942.72	1.21027	0.0518316	0.00993994	0.00821298	0.423239	2.10632	0.825572	0.786158	268.829	2.24825	2.36273	2.10632	0.936871	4966.5	22.3489	7817.92	188.038	5683.9	44.4981
2019-05-08	NR1901Vein_T2_38	4895.96	91288.5	74255.8	187165	34711.5	18783.3	1.84799	0.468154	0.0723065	0.0391271	0.255503	9.03001	0.813394	0.866191	438.744	9.07146	3.91385	9.03001	0.995431	4945.37	24.6473	10263.1	866.379	6179.82	168.935
2019-05-08	NR1901Vein_T2_39	5557.91	102386	85280.7	211823	92732.6	34474.9	2.68986	0.530245	0.193169	0.0718137	0.371857	4.59972	0.838215	1.00888	310.66	4.70906	2.6892	4.59972	0.976781	4988.1	28.6531	8415.22	418.408	5830.24	91.1105
2019-05-08	NR1901Vein_T2_40	363.861	8022.29	6501.9	16240	8350.49	16440	0.507938	0.0408336	0.0173947	0.0342457	2.11328	6.50208	0.803924	1.20479	52.4281	6.61276	0.473198	6.50208	0.983263	4928.7	34.3075	2497.57	263.795	4039.54	123.9
2019-05-08	NR1901Vein_T2_41	4311.05	76866	65428.6	161714	59125.5	22524.6	2.62493	0.403513	0.123163	0.0469204	0.291476	3.38066	0.828398	0.456451	391.689	3.41134	3.43081	3.38066	0.991008	4971.36	12.9732	9596.02	328.954	6064.9	66.8501
2019-05-08	NR1901Vein_T2_42	56.5343	1426.68	1196.59	2878.95	2456.41	4642.17	0.529152	0.00730314	0.00511689	0.00966998	3.30233	3.25295	0.823853	2.78514	34.3823	4.28237	0.302816	3.25295	0.759614	4963.54	79.1865	1705.26	96.7517	3621.07	81.1741
2019-05-08	NR1901Vein_T2_43	535.814	12718	10688.6	26411.2	7681.77	5183.75	1.48189	0.0661236	0.0160017	0.0107981	0.444921	8.02723	0.825068	1.17722	255.572	8.11309	2.24759	8.02723	0.989417	4965.64	33.4672	7593.32	679.189	5632.75	152.128
2019-05-08	NR1901Vein_T2_44	112.833	298.871	133.114	281.878	8870	19091.4	0.464608	0.000947517	0.0184769	0.0397687	68.9354	4.42719	0.33691	8.74518	0.673563	9.80195	0.0145063	4.42719	0.451665	3648.81	267.519	92.8421	8.15652	522.877	77.1105
2019-05-08	NR1901Vein_T2_45	17.8307	625.901	345.305	805.852	8728.3	21644.3	0.403262	0.00235871	0.0181817	0.0450866	36.2991	4.06746	0.554596	5.0113	2.10565	6.45425	0.0275489	4.06746	0.630198	4393.32	146.506	175.189	14.0443	1150.66	85.191
2019-05-08	NR1901Vein_T2_46	1375.82	26210.1	21754.2	55020	37786.4	21726.4	1.73919	0.136692	0.0787119	0.0452577	0.942602	7.59671	0.825372	0.620819	120.678	7.62204	1.06089	7.59671	0.996677	4966.16	17.6489	4661.66	485.44	4875.24	142.96
2019-05-08	NR1901Vein_T2_47	58.3439	859.555	663.417	1725.02	2243.17	5169.73	0.433906	0.00431109	0.00467269	0.0107689	6.13065	6.82545	0.752485	2.57432	16.916	7.29479	0.163115	6.82545	0.935662	4834.36	73.6224	974.064	122.244	2930.08	131.04
2019-05-08	NR1901Vein_T2_50	48.9515	552.29	293.714	743.769	8007.6	21578.7	0.371089	0.00211012	0.0166804	0.0449499	38.6054	6.94221	0.463591	6.76782	1.65498	9.69524	0.0259031	6.94221	0.716043	4129.41	200.807	164.856	22.5596	991.458	115.861
2019-05-08	NR1901Vein_T2_51	38.6881	336.524	270.002	727.789	749.27	2354.18	0.318272	0.00177105	0.00156078	0.00490394	7.34616	8.74845	0.810969	7.13061	15.2142	11.2863	0.136126	8.74845	0.775138	4941.12	202.939	822.716	133.746	2828.74	195.066
2019-05-08	NR1901Vein_T2_52	bd	1121.52	623.557	1421.52	10340	37032.6	0.279214	0.00420305	0.021539	0.0771416	34.5575	4.21174	0.574712	3.7746	2.292	5.65565	0.0289373	4.21174	0.744696	4445.33	110.046	183.894	15.2534	1209.82	76.9719
2019-05-08	NR1901Vein_T2_53	142.786	2379.26	1747.81	4420.93	10519.8	27473.4	0.382908	0.0113458	0.0219135	0.0572291	11.9488	4.84143	0.734245	1.76806	8.4688	5.15417	0.0836903	4.84143	0.939323	4799.24	50.6472	518.112	48.0256	2282.58	89.5476
2019-05-08	NR1901Vein_T2_56	122.792	2707.23	2265.2	5293.07	3854.83	9585.99	0.402131	0.0136255	0.00802988	0.0199683	3.76797	4.80646	0.810367	1.23419	29.6401	4.96239	0.265395	4.80646	0.968578	4940.07	35.1269	1517.38	128.676	3474.96	93.0853
2019-05-08	NR1901Vein_T2_58	469.155	6595.07	5446.44	13587.5	1751.65	5073.97	0.345223	0.0340176	0.00364882	0.0105695	0.82613	4.94984	0.815293	0.94551	136.01	5.03933	1.21046	4.94984	0.982241	4948.69	26.9003	5113.31	340.325	4995.74	96.8235
2019-05-08	NR1901Vein_T2_59	bd	290.562	227.712	688.074	1641.38	2546.78	0.644489	0.0016012	0.0034191	0.00530514	9.1169	7.57383	0.868508	6.51653	13.129	9.99141	0.109686	7.57383	0.758035	5038.46	184.669	670.926	95.8044	2688.97	172.941
2019-05-08	NR1901Vein_T1_04	0.882029	77.0375	40.2404	71.8045	170.699	1726.69	0.0988586	0.000250971	0.000355578	0.00359683	23.15	11.8781	0.465981	20.487	2.77411	23.6814	0.0431966	11.8781	0.501579	4137.04	607.596	272.616	63.1031	1348.6	303.316	large uncertainty
2019-05-08	NR1901Vein_T1_05	bd	232.913	42.1235	61.365	5430.22	21027	0.25825	0.000446509	0.0113115	0.0438008	94.16	3.96338	0.166597	7.62227	0.243841	8.59113	0.0106202	3.96338	0.461335	2523.74	256.006	68.1013	5.36759	221.561	33.6386	low Pb
2019-05-08	NR1901Vein_T1_07	209.694	3518.16	2618.16	6212.52	10721.8	44771.6	0.239477	0.0163907	0.0223342	0.0932625	13.4612	11.3133	0.720461	2.78304	7.37621	11.6506	0.0742876	11.3133	0.97105	4772.08	79.8241	461.936	100.083	2158.09	189.511	large uncertainty
2019-05-08	NR1901Vein_T1_09	bd	409.878	41.4417	92.5188	10854.3	37122.2	0.292393	0.000721842	0.0226102	0.0773282	95.9518	2.32237	0.101172	9.45873	0.145316	9.73967	0.0104219	2.32237	0.238445	1645.73	350.906	66.8362	3.0876	137.768	24.7902	low Pb
2019-05-08	NR1901Vein_T1_10	d	232.978	26.6689	34.3481	4141.77	21161.2	0.195725	0.000390222	0.00862761	0.0440804	97.8117	3.66987	0.1133	14.4612	0.159642	14.9195	0.0102237	3.66987	0.245977	1853.01	522.798	65.5718	4.78663	150.389	40.8758	large uncertainty
2019-05-08	NR1901Vein_T1_14	bd	179.327	28.0326	5.73308	4578.3	16262.8	0.28152	0.00028284	0.00953694	0.0338766	93.3065	4.4911	0.152538	15.9008	0.225306	16.5229	0.0107174	4.4911	0.271811	2374.58	542.179	68.721	6.13695	206.316	59.8965	large uncertainty
2019-05-08	NR1901Vein_T1_15	d	45.8573	23.7082	19.0573	175.586	1798.95	0.0976048	0.00011763	0.000365758	0.00374734	39.0517	10.97	0.481952	15.2309	1.70086	18.7702	0.0256071	10.97	0.584437	4186.94	450.407	162.996	35.2166	1008.86	215.476	large uncertainty
2019-05-08	NR1901Vein_T1_16	45.8715	47.6234	21.8088	90.2111	282.603	2538.91	0.111309	0.000211896	0.000588683	0.00528873	55.843	10.0484	0.467695	21.989	1.15425	24.1762	0.0179073	10.0484	0.415635	4142.48	651.933	114.417	22.7512	779.247	233.919	large uncertainty
2019-05-08	NR1901Vein_T1_17	d	37.2107	31.1495	48.4279	84.9844	2348.03	0.0361938	0.000155014	0.000177029	0.00489113	67.7944	16.3682	0.594528	21.5923	1.2086	27.0951	0.0147505	16.3682	0.604101	4494.68	627.886	94.3932	30.603	804.55	263.696	large uncertainty
2019-05-08	NR1901Vein_T1_20	bd	260.346	38.4871	67.5188	3971.77	24045.2	0.165179	0.000486262	0.00827349	0.0500879	95.0666	3.74266	0.13995	10.0438	0.202885	10.7184	0.0105189	3.74266	0.34918	2226.58	347.881	67.4553	5.02097	187.564	36.0646	large uncertainty
2019-05-08	NR1901Vein_T1_21	bd	195.452	38.0326	43.4162	2224.27	17658.5	0.12596	0.000367533	0.00463332	0.036784	94.3971	4.22499	0.193155	11.5803	0.282003	12.3269	0.0105935	4.22499	0.342744	2769.21	379.961	67.9312	5.7075	252.245	53.6243	large uncertainty
2019-05-08	NR1901Vein_T1_22	d	362.012	34.6235	72.5188	2530.22	34642.6	0.0730379	0.000622713	0.00527064	0.072163	99.1598	2.6329	0.0990549	11.2247	0.137672	11.5294	0.0100847	2.6329	0.228364	1606.4	418.542	64.6848	3.38825	130.968	27.9451	large uncertainty
2019-05-08	NR1901Vein_T1_23	28.2078	140.501	35.262	57.5188	1814.75	11916.5	0.152289	0.000309638	0.00378025	0.0248229	91.5293	5.98301	0.259991	12.1879	0.391475	13.5772	0.0109255	5.98301	0.440666	3246.65	384.018	70.0481	8.33121	335.446	74.7506	large uncertainty
2019-05-08	NR1901Vein_T1_24	bd	343.772	31.7316	47.174	4112.6	32344.5	0.12715	0.000561023	0.00856685	0.0673759	99.7543	2.86085	0.0906209	11.5367	0.1252	11.8861	0.0100246	2.86085	0.240688	1438.65	439.871	64.3012	3.65979	119.775	26.5089	large uncertainty
2019-05-08	NR1901Vein_T1_27	bd	263.551	35.6588	66.9783	5360.08	23934	0.223952	0.000486045	0.0111654	0.0498563	95.8796	3.26124	0.147217	11.4585	0.21161	11.9136	0.0104297	3.26124	0.273741	2313.84	393.197	66.8863	4.33863	194.903	41.3993	large uncertainty
2019-05-08	NR1901Vein_T1_28	bd	320.419	34.8747	32.5188	6401.9	29836.5	0.214566	0.000514746	0.0133356	0.0621515	96.7193	3.31371	0.107561	10.9206	0.153267	11.4123	0.0103392	3.31371	0.290362	1758.51	399.406	66.3085	4.37053	144.793	30.3422	large uncertainty
2019-05-08	NR1901Vein_T1_30	d	152.29	29.5834	79.5776	2640.7	12661.7	0.208558	0.000347026	0.00550077	0.0263752	83.3189	5.60712	0.221329	13.9911	0.366101	15.0728	0.0120021	5.60712	0.372001	2990.39	450.176	76.9097	8.5679	316.76	78.885	large uncertainty
2019-05-08	NR1901Vein_T1_31	150.115	359.015	32.7079	53.4647	6413.37	30675.2	0.209073	0.000590902	0.0133595	0.0638988	91.805	3.12068	0.094443	12.2475	0.141778	12.6389	0.0108926	3.12068	0.246912	1516.99	462.079	69.8388	4.33391	134.626	31.381	large uncertainty
2019-05-08	NR1901Vein_T1_32	bd	69.5123	26.0813	31.8778	343.02	4958.56	0.0691773	0.000169194	0.000714536	0.010329	74.3613	8.46441	0.439883	16.5007	0.81526	18.5451	0.0134478	8.46441	0.456423	4051.35	491.863	86.1127	14.4647	605.401	156.444	large uncertainty
2019-05-08	NR1901Vein_T1_33	bd	548.586	29.8508	58.8702	12105.9	50973.3	0.237494	0.000845904	0.0252174	0.106181	96.5898	2.65123	0.0572089	13.9847	0.0816278	14.2338	0.0103531	2.65123	0.186263	499.594	615.958	66.397	3.50165	79.6742	21.5832	large uncertainty
2019-05-08	NR1901Vein_T1_34	129.231	96.7345	83.5304	142.519	444.508	2953.89	0.150483	0.000428434	0.000925943	0.00615316	32.1678	17.762	0.769627	16.4814	3.29735	24.2306	0.031087	17.762	0.733037	4866.54	470.651	197.348	68.6763	1480.43	321.018	large uncertainty
2019-05-08	NR1901Vein_T1_35	116.447	65.253	18.0326	20.3393	320.002	3950.8	0.0809967	0.000137542	0.000666587	0.00822981	64.6571	9.25291	0.300804	14.2203	0.641171	16.9656	0.0154662	9.25291	0.545392	3474.37	440.407	98.9383	18.144	503.031	126.397	large uncertainty
2019-05-08	NR1901Vein_T1_36	bd	508.856	43.4871	96.1552	5311.18	51388	0.103354	0.000860757	0.0110636	0.107045	105.113	3.87609	0.0877167	10.1943	0.115009	10.9063	0.00951353	3.87609	0.355399	1376.29	392.025	61.0383	4.70774	110.537	22.5917	large uncertainty
2019-05-08	NR1901Vein_T1_37	1171.44	20414	16492	43233.8	3636.77	40118	0.0906518	0.10637	0.00757566	0.0835688	1.75954	13.1677	0.816697	1.50428	63.9688	13.2534	0.568331	13.1677	0.993538	4951.14	42.7929	2900.96	587.596	4238.11	235.462	large uncertainty
2019-05-08	NR1901Vein_T1_41	bd	74.8827	50.1538	93.0027	289.593	1897.49	0.152619	0.000289405	0.000603243	0.00395261	26.4475	7.54195	0.695758	10.9569	3.6256	13.3017	0.0378107	7.54195	0.566992	4721.98	315.021	239.249	35.3295	1555.17	192.31	large uncertainty
2019-05-08	NR1901Vein_T1_47	24.9422	231.276	143.487	248.823	1118.84	4059.69	0.275596	0.000827691	0.00233061	0.00845663	17.7749	10.9767	0.647781	15.7163	5.02259	19.17	0.0562592	10.9767	0.572595	4619.01	454.14	352.835	74.9401	1823.14	281.702	large uncertainty
2019-05-08	NR1901Vein_T1_49	bd	119.162	40.3403	64.9262	4723.34	9943.43	0.475022	0.000297887	0.00983907	0.0207129	87.0621	5.08259	0.34623	17.4922	0.548077	18.2157	0.0114861	5.08259	0.279023	3690.49	533.576	73.6218	7.43692	443.736	123.181	large uncertainty
2019-05-08	NR1901Vein_T1_50	55.7016	33.3358	10.0647	50.3759	686.413	1433.84	0.478724	0.00012447	0.00142985	0.00298679	49.8004	17.6685	0.328188	46.2766	0.908231	49.5348	0.0200802	17.6685	0.356688	3608.64	1419.56	128.163	44.6863	656.117	392.242	large uncertainty
2019-05-08	NR1901Vein_T1_52	bd	393.123	43.3706	82.5188	11530	39463.4	0.292171	0.00068889	0.0240179	0.0822051	98.3384	2.86449	0.110425	11.5925	0.154757	11.9412	0.010169	2.86449	0.239883	1806.42	421.478	65.2223	3.71666	146.104	31.9896	large uncertainty
2019-05-08	NR1901Vein_T1_53	bd	270.106	27.2533	121.805	24890.7	26488.3	0.939686	0.00055636	0.051849	0.055177	104.903	3.60195	0.117271	13.1152	0.154066	13.6008	0.00953257	3.60195	0.264834	1915.05	470.623	61.1599	4.38357	145.496	36.2186	large uncertainty
2019-05-08	NR1901Vein_T1_55	142.1	317.401	39.9518	165.211	22054.6	29824.5	0.739481	0.000693604	0.0459414	0.0621265	97.9095	3.6836	0.122408	12.6798	0.172302	13.2041	0.0102135	3.6836	0.278975	1991.61	450.925	65.5066	4.79978	161.414	38.6654	large uncertainty
2019-05-08	NR1901Vein_T1_57	58.7918	185.147	32.1884	54.5776	12259	16325.6	0.750906	0.000360913	0.0255364	0.0340074	89.7425	3.54323	0.186561	14.6158	0.286502	15.0392	0.011143	3.54323	0.2356	2712.08	482.096	71.4351	5.03231	255.802	65.8333	large uncertainty
2019-05-08	NR1901Vein_T1_65	5081.96	78574.1	65962.7	162232	8604.83	9052.79	0.950516	0.407178	0.0179245	0.0188576	0.140169	20.3666	0.831044	0.60655	817.104	20.3757	7.13424	20.3666	0.999557	4975.89	17.2359	13512.2	1969.16	6810.16	346.723	large uncertainty
2019-05-08	NR1901Vein_T1_66	45.7921	91.4567	23.7901	45.9803	5976.1	8317.41	0.718505	0.000213998	0.0124486	0.0173258	96.6053	6.2701	0.28751	20.308	0.410165	21.2539	0.0103514	6.2701	0.295009	3404.19	632.207	66.3864	8.27695	348.994	118.366	large uncertainty
2019-05-08	NR1901Vein_T1_67	bd	42.4335	15.6083	34.0813	1716.46	1962.41	0.874669	0.000122276	0.00357551	0.00408784	48.4396	9.2422	0.39283	27.0518	1.11766	28.5871	0.0206443	9.2422	0.3233	3881.86	814.873	131.726	24.0568	761.854	267.769	large uncertainty
2019-05-08	NR1901Vein_T1_68	bd	46.0809	33.2906	62.782	1497.88	3363.1	0.445387	0.000188681	0.0031202	0.00700559	69.5099	10.9416	1.0776	25.2125	2.13657	27.4843	0.0143864	10.9416	0.398104	5342.17	705.597	92.0802	19.9759	1160.71	322.936	large uncertainty
2019-05-08	NR1901Vein_T2_01	35.6356	161.961	50.3895	132.519	4714.79	10036.5	0.469762	0.000457748	0.00982124	0.0209069	64.5317	7.47222	0.245469	15.8053	0.524239	17.4826	0.0154962	7.47222	0.427409	3155.78	501.612	99.1291	14.6842	427.979	115.305	large uncertainty
2019-05-08	NR1901Vein_T2_04	bd	237.846	99.8508	294.616	8680.94	12692.3	0.683952	0.000839273	0.018083	0.026439	59.3965	7.1572	0.361857	12.932	0.83962	14.7805	0.016836	7.1572	0.484232	3757.67	392.702	107.628	15.2604	618.936	128.508	large uncertainty
2019-05-08	NR1901Vein_T2_10	94.0035	2887.85	2237.54	5801.27	5383.79	12355.9	0.435728	0.014503	0.0112148	0.0257382	3.4682	11.2533	0.81221	1.51864	32.2753	11.3553	0.288334	11.2533	0.991017	4943.3	43.2165	1633.2	316.797	3558.73	202.144	large uncertainty
2019-05-08	NR1901Vein_T2_11	39.4498	2340.75	1966.56	4601.75	5103.12	5779.07	0.883033	0.0118251	0.0106302	0.0120382	2.39566	13.1406	0.832209	2.78018	47.8755	13.4315	0.417422	13.1406	0.978343	4977.88	78.9952	2248.76	480.564	3949.11	237.189	large uncertainty
2019-05-08	NR1901Vein_T2_12	53.0831	43.679	40.7155	50.2017	553.02	1731	0.31948	0.000178651	0.00115198	0.0036058	43.9072	13.7213	0.412646	56.9846	1.29523	58.6133	0.0227753	13.7213	0.234098	3955.81	1708.57	145.172	39.2737	843.615	515.547	large uncertainty
2019-05-08	NR1901Vein_T2_13	bd	70.0963	54.3962	106.269	805.52	1182.28	0.681327	0.000306292	0.00167796	0.00246278	20.1553	11.9697	0.654461	15.6791	4.47508	19.7258	0.0496148	11.9697	0.606805	4633.83	452.731	312.156	72.5384	1726.36	283.793	large uncertainty
2019-05-08	NR1901Vein_T2_14	76.9395	182.012	31.4029	58.7383	6830.22	12472.7	0.547615	0.000361232	0.0142278	0.0259815	72.638	5.45248	0.146742	18.8816	0.278418	19.6531	0.0137669	5.45248	0.277436	2308.31	648.297	88.1418	9.53936	249.402	83.3986	large uncertainty
2019-05-08	NR1901Vein_T2_15	19.7136	504.31	271.493	848.428	7265.45	11325.6	0.641507	0.00215586	0.0151345	0.023592	21.0646	14.9435	0.645481	5.10438	4.22315	15.7913	0.0474731	14.9435	0.946317	4613.87	147.534	298.989	86.7324	1678.53	230.92	large uncertainty
2019-05-08	NR1901Vein_T2_16	55.8825	229.617	179.74	324.185	5093.02	7238.28	0.703623	0.000973638	0.0106091	0.0150779	25.3162	18.1518	0.488706	11.0515	2.66045	21.2514	0.0395004	18.1518	0.854145	4207.5	326.429	249.736	88.3216	1317.55	273.34	large uncertainty
2019-05-08	NR1901Vein_T2_22	bd	192.449	66.4536	200.94	10919	17175.6	0.635729	0.000610353	0.0227451	0.035778	92.8331	6.20388	0.221208	14.4058	0.328401	15.6848	0.010772	6.20388	0.395534	2989.51	463.553	69.0696	8.51861	288.344	75.8396	large uncertainty
2019-05-08	NR1901Vein_T2_30	61.7675	3164.4	2517.5	6379.31	3929.76	15982.9	0.245872	0.0160089	0.00818597	0.0332936	4.73951	10.1672	0.790103	1.46675	22.975	10.2725	0.210992	10.1672	0.989754	4904	41.8139	1234.1	224.437	3225.89	182.483	large uncertainty
2019-05-08	NR1901Vein_T2_32	46.4046	2418.65	2135.5	5223.73	2454.53	7324.91	0.335094	0.0129783	0.00511297	0.0152583	2.80469	10.5659	0.827435	1.93152	40.6589	10.741	0.356546	10.5659	0.983698	4969.71	54.9016	1965.78	348.453	3786.89	193.27	large uncertainty
2019-05-08	NR1901Vein_T2_36	bd	843.031	639.548	1620.85	7605.52	15495.2	0.49083	0.00411921	0.0158429	0.0322777	21.0764	10.4454	0.7553	4.68793	4.93889	11.4491	0.0474465	10.4454	0.912329	4839.69	134.036	298.825	60.7153	1808.93	176.993	large uncertainty
2019-05-08	NR1901Vein_T2_48	215.299	345.968	203.518	472.519	4691.92	12942.9	0.362508	0.00135652	0.0097736	0.026961	21.0081	18.1058	0.612888	4.76224	4.02069	18.7216	0.0476007	18.1058	0.967107	4538.85	138.167	299.774	105.205	1638.39	266.286	large uncertainty
2019-05-08	NR1901Vein_T2_49	bd	141.385	54.6759	71.1552	1424.27	2653.36	0.53678	0.000354678	0.00296686	0.00552714	27.1605	18.8197	0.630232	17.8647	3.19793	25.9486	0.0368182	18.8197	0.725268	4579.29	517.248	233.081	85.5921	1456.66	338.267	large uncertainty
2019-05-08	NR1901Vein_T2_54	bd	368.679	36.7244	113.769	13683.8	34734.1	0.393958	0.000689102	0.0285043	0.0723537	95.5235	2.41224	0.100735	15.1735	0.145336	15.364	0.0104686	2.41224	0.157005	1637.69	563.497	67.1343	3.22126	137.786	38.8395	large uncertainty
2019-05-08	NR1901Vein_T2_55	70.003	429.327	131.972	310.852	14677.6	28565.6	0.51382	0.00115761	0.0305745	0.0595043	70.1005	7.07831	0.262475	12.1247	0.516027	14.0396	0.0142652	7.07831	0.504167	3261.62	381.58	91.3099	12.8225	422.494	92.6848	large uncertainty
2019-05-08	NR1901Vein_T2_57	bd	143.123	48.0326	146.269	4815.94	10497.2	0.458782	0.000447867	0.0100319	0.0218665	75.4887	6.57403	0.334643	17.2691	0.61095	18.4781	0.013247	6.57403	0.355775	3638.48	528.646	84.835	11.0716	484.159	133.182	large uncertainty
2019-05-08	NR1901Vein_T2_60	97.2232	21.6633	7.23434	bd	934.27	1406.01	0.664485	2.28107e-05	0.00194615	0.00292881	61.7153	15.951	0.112687	83.679	0.251644	85.1857	0.0162034	15.951	0.18725	1843.2	3028.76	103.617	32.7084	227.911	299.09	large uncertainty
2019-05-08	NR1901Vein_T2_61	8.2453	46.3514	12.9229	7.5188	941.206	2409.07	0.390692	8.8655e-05	0.0019606	0.00501828	55.1736	18.1727	0.0850957	165.321	0.21256	166.317	0.0181246	18.1727	0.109265	1317.72	6409.6	115.792	41.5751	195.699	466.454	large uncertainty
2019-05-10	NR1901SF_T4_01	310.728	7542.13	6192.32	15511.7	20.9689	567.755	0.036933	0.0566207	5.37961e-05	0.00145658	0.0785719	4.81099	0.840726	0.902588	1474.66	4.89492	12.7272	4.81099	0.982853	4992.35	25.6296	16885.6	550.865	7409.11	94.7732
2019-05-10	NR1901SF_T4_02	938.204	14227	11949.3	29885.2	79.2841	743.324	0.106662	0.108535	0.000203405	0.00190701	0.0518378	4.78482	0.828716	0.763881	2203.26	4.84541	19.291	4.78482	0.987495	4971.91	21.7104	19404.8	561.331	7816.57	93.8777
2019-05-10	NR1901SF_T4_03	1321.21	20239.5	17159.2	43399.1	255.374	1386.45	0.184193	0.156425	0.000655167	0.00355695	0.066142	4.87277	0.827019	0.648943	1723.23	4.91579	15.119	4.87277	0.991248	4968.99	18.4461	17921	563.867	7567.18	95.1678
2019-05-10	NR1901SF_T4_04	2890.08	51572.6	43460.5	108490	8506.83	10032.4	0.847938	0.394023	0.0218244	0.0257382	0.195026	4.21332	0.835963	0.543124	590.747	4.24818	5.12753	4.21332	0.991794	4984.28	15.4278	11686	439.253	6481.27	82.6665
2019-05-10	NR1901SF_T4_05	2917.8	57675.3	47551.8	118478	5652.75	8170.01	0.69189	0.433094	0.0145022	0.0209603	0.149262	2.16737	0.831821	0.622448	768.046	2.25498	6.69964	2.16737	0.961148	4977.22	17.6866	13158.2	238.67	6747.37	44.7338
2019-05-10	NR1901SF_T4_06	874.574	17003.1	14262.3	33903.4	850.734	3795.32	0.224153	0.126167	0.00218257	0.00973697	0.232002	3.647	0.835338	0.816435	496.223	3.73726	4.31031	3.647	0.975846	4983.22	23.1925	10763.3	370.785	6304.55	73.0505
2019-05-10	NR1901SF_T4_07	2552.39	44158.4	37244	92679.4	3180.3	7130.73	0.446	0.337023	0.00815913	0.018294	0.15811	3.49907	0.828234	0.532978	721.939	3.53943	6.32473	3.49907	0.988597	4971.08	15.1485	12836.5	378.224	6684.6	69.3547
2019-05-10	NR1901SF_T4_08	562.149	11051.9	9716.53	24119.7	490.118	1761.66	0.278213	0.0869035	0.00125741	0.00451957	0.170437	5.07635	0.833545	0.909647	674.017	5.15721	5.86727	5.07635	0.984322	4980.16	25.8439	12420.7	536.245	6614.95	99.5339
2019-05-10	NR1901SF_T4_09	637.168	9402.19	7795.77	19262.7	1247.61	8269.71	0.150865	0.070588	0.00320076	0.0212161	0.844484	5.08352	0.829534	0.983892	135.378	5.17786	1.18415	5.08352	0.98178	4973.31	27.9617	5036.13	345.887	4991.05	99.3556
2019-05-10	NR1901SF_T4_10	603.865	9380.66	7712.59	19295.8	696.914	5597.74	0.124499	0.0704494	0.00178795	0.0143611	0.63068	3.77907	0.814309	1.09997	177.945	3.93589	1.58559	3.77907	0.960154	4946.97	31.2971	6123.79	292.071	5266.87	76.5247
2019-05-10	NR1901SF_T4_11	655.176	8955.1	7618.83	19097.4	54.7944	757.313	0.0723536	0.0690599	0.000140576	0.0019429	0.0864484	4.38589	0.835412	0.727237	1331.83	4.44577	11.5676	4.38589	0.98653	4983.34	20.6585	16316.7	500.527	7305.74	86.4303
2019-05-10	NR1901SF_T4_12	2286.08	42198.4	35209.2	87554.7	6808.03	11075.4	0.614697	0.319368	0.0174661	0.0284142	0.273166	3.27875	0.831021	0.648973	419.268	3.34236	3.66078	3.27875	0.980969	4975.85	18.4414	9922.21	323.758	6133.82	65.5517
2019-05-10	NR1901SF_T4_13	4170.41	79229.1	66127.9	165324	12529.3	16097.8	0.778322	0.601481	0.0321441	0.0412992	0.209991	2.97972	0.827764	0.445315	543.264	3.01281	4.7621	2.97972	0.989016	4970.27	12.6573	11289.6	309.927	6396.34	59.3047
2019-05-10	NR1901SF_T4_14	4020.72	79281.9	66669.6	167326	63630.9	24833.5	2.5623	0.606507	0.163246	0.0637108	0.309794	2.77815	0.830067	0.513973	369.272	2.8253	3.22795	2.77815	0.983314	4974.22	14.6063	9293.91	267.823	6005.22	55.6661
2019-05-10	NR1901SF_T4_15	1365.59	21664.5	18220.4	45805.1	16703.3	9278.43	1.80022	0.165896	0.0428525	0.023804	0.358481	6.58324	0.832541	0.629172	320.07	6.61324	2.78955	6.58324	0.995464	4978.45	17.8767	8588.21	596.337	5860.44	125.761
2019-05-10	NR1901SF_T4_16	1533.51	30263	25317.9	63618.5	22233.6	14904.3	1.49175	0.23077	0.0570406	0.0382373	0.457529	6.00334	0.830485	0.723621	250.161	6.04679	2.18565	6.00334	0.992814	4974.94	20.5634	7469.18	510.295	5611.1	115.484
2019-05-10	NR1901SF_T4_17	1279.68	23120.4	19402.5	48610.7	4372.61	4833.17	0.904708	0.176435	0.011218	0.0123996	0.236064	5.13957	0.830406	1.13005	484.804	5.26233	4.23614	5.13957	0.97667	4974.8	32.1134	10672.6	514.958	6280.96	101.409
2019-05-10	NR1901SF_T4_18	2700.42	48151.1	40355.9	100154	27492.5	15113.6	1.81906	0.365248	0.0705326	0.0387742	0.327922	5.08677	0.828599	0.623996	348.241	5.1249	3.04951	5.08677	0.99256	4971.71	17.7349	9015.92	475.871	5945.84	98.8093
2019-05-10	NR1901SF_T4_19	2552.61	49574.8	41458.2	102626	10696.6	9236.75	1.15805	0.374925	0.0274422	0.023697	0.169964	8.18773	0.833709	0.527304	676.025	8.20469	5.88359	8.18773	0.997933	4980.44	14.981	12436	844.467	6617.97	154.069
2019-05-10	NR1901SF_T4_20	2083.72	40120.2	33888.3	84687.2	25098.7	12044.4	2.08384	0.307236	0.0643911	0.0309002	0.2919	3.66359	0.835807	0.526357	394.618	3.70121	3.42583	3.66359	0.989836	4984.01	14.9517	9588.76	355.624	6072.45	72.3341
2019-05-10	NR1901SF_T4_21	843.183	15718.2	12932.9	31858.6	9264.28	5400.47	1.71546	0.117147	0.0237677	0.013855	0.381974	2.203	0.831873	0.715491	300.143	2.31628	2.61798	2.203	0.951096	4977.31	20.3303	8289.54	202.316	5795.39	45.8319
2019-05-10	NR1901SF_T4_22	1150.73	17034	14364	36006.3	15904	7754.89	2.05083	0.130495	0.0408019	0.0198953	0.478701	2.33566	0.835928	0.905564	240.664	2.50507	2.08899	2.33566	0.932375	4984.22	25.7233	7270.55	200.496	5571.96	49.4382
2019-05-10	NR1901SF_T4_23	4398.16	84687.6	70937.9	178701	64398.1	27773.5	2.31869	0.647257	0.165215	0.0712534	0.317945	3.26075	0.834253	0.516104	361.62	3.30134	3.1452	3.26075	0.987705	4981.37	14.6622	9166.49	311.343	5984.01	64.7486
2019-05-10	NR1901SF_T4_24	725.824	9575.47	8031.52	20226.3	3349.69	4904.32	0.683008	0.0732454	0.00859369	0.0125821	0.572071	6.14498	0.831836	1.24679	200.398	6.27019	1.74804	6.14498	0.980031	4977.25	35.427	6516.59	485.231	5386.9	119.397
2019-05-10	NR1901SF_T4_25	1429.11	26138.8	22103.9	54516.4	5614.56	6685.57	0.839802	0.198942	0.0144042	0.017152	0.259333	4.22917	0.839792	0.657685	446.292	4.28	3.85604	4.22917	0.988123	4990.77	18.6767	10186.8	419.054	6197.1	83.2173
2019-05-10	NR1901SF_T4_26	1167.64	21826.5	18400.7	44994	5172.66	5569.6	0.928732	0.164989	0.0132706	0.0142889	0.277858	3.55992	0.835431	0.651266	414.375	3.619	3.59897	3.55992	0.983674	4983.37	18.5004	9836.14	349.526	6121.93	70.7905
2019-05-10	NR1901SF_T4_27	1131.88	20937.6	17692.5	43176.8	6657.1	8273.52	0.804627	0.158378	0.0170789	0.0212259	0.428546	2.34296	0.827403	0.896238	266.089	2.50853	2.33347	2.34296	0.933999	4969.65	25.4747	7761.58	208.062	5673.53	49.524
2019-05-10	NR1901SF_T4_28	1819.86	32833.3	27701.6	68798.2	5900.73	10258.3	0.575217	0.25039	0.0151384	0.0263178	0.306266	6.3247	0.834096	0.628529	375.338	6.35585	3.26513	6.3247	0.995098	4981.1	17.8563	9350.35	595.841	6021.72	121.199
2019-05-10	NR1901SF_T4_29	2963.15	53339	44618.8	111939	33026.2	17687.6	1.86719	0.406362	0.0847292	0.0453779	0.364395	3.59571	0.833197	0.515109	315.123	3.63242	2.74427	3.59571	0.989894	4979.57	14.6351	8510.73	331.124	5844.68	70.9919
2019-05-10	NR1901SF_T4_30	2070.15	36055.6	31715	74710.7	15399.7	16985.6	0.906634	0.275844	0.0395082	0.0435768	0.478511	8.24434	0.82119	0.807329	236.515	8.28377	2.08982	8.24434	0.99524	4958.94	22.9585	7272.28	681.582	5554.38	155.051
2019-05-10	NR1901SF_T4_31	494.281	7361.79	6285.95	16481.3	704.692	755.886	0.932273	0.05833	0.0018079	0.00193924	0.086045	6.95625	0.84844	1.05795	1358.94	7.03624	11.6218	6.95625	0.988632	5005.31	30.024	16344.4	777.031	7326.19	133.597
2019-05-10	NR1901SF_T4_33	637.821	11169.6	9449.74	23539.2	2009.07	2453.94	0.81871	0.0854912	0.0051543	0.00629563	0.225499	4.52251	0.835313	0.737821	510.518	4.5823	4.43462	4.52251	0.986952	4983.17	20.9594	10912.4	459.05	6333.33	88.8689
2019-05-10	NR1901SF_T4_34	21313.6	404393	341299	788429	69159.5	23883.3	2.89573	2.97007	0.17743	0.061273	0.0736634	9.41876	0.837669	0.458621	1567.21	9.42992	13.5753	9.41876	0.998817	4987.17	13.0258	17272	1042.07	7470.87	175.33
2019-05-10	NR1901SF_T4_35	7874.99	158379	133825	329734	68827.2	33159.3	2.07565	1.20408	0.176577	0.0850707	0.22971	7.0922	0.833942	0.4916	500.335	7.10922	4.35331	7.0922	0.997606	4980.84	13.9664	10815.2	703.729	6312.92	134.735
2019-05-10	NR1901SF_T4_36	1982.7	34902	29650	73558.1	12230	7964.52	1.53555	0.267382	0.0313762	0.0204331	0.241509	2.76428	0.840042	0.685244	479.373	2.84794	4.14063	2.76428	0.970622	4991.19	19.4589	10553.9	280.857	6269.55	56.1341
2019-05-10	NR1901SF_T4_37	513.959	10367.1	8738.85	21677.3	4331.09	7235.57	0.598583	0.0789566	0.0111115	0.018563	0.709896	4.38274	0.827675	0.970571	160.683	4.48892	1.40866	4.38274	0.976346	4970.12	27.587	5666.84	322.272	5163.87	86.7794
2019-05-10	NR1901SF_T4_38	494.786	7821.99	6576.03	16403.4	475.224	2025.07	0.23467	0.0596317	0.0012192	0.00519536	0.26	2.9036	0.830463	0.827093	440.203	3.0191	3.84616	2.9036	0.961743	4974.9	23.5039	10173.6	290.465	6183.18	59.4001
2019-05-10	NR1901SF_T4_39	2017.31	39774.3	33425.5	83252.4	6845.69	7613.38	0.899166	0.302892	0.0175627	0.0195323	0.205184	4.80387	0.834315	0.522868	560.392	4.83224	4.87367	4.80387	0.994129	4981.47	14.8543	11413.2	494.452	6427.8	93.5151
2019-05-10	NR1901SF_T4_40	1578.47	28643.9	24018.3	60075.2	6964.69	6898.49	1.0096	0.21826	0.017868	0.0176982	0.260549	8.88686	0.829373	0.531319	438.699	8.90272	3.83805	8.88686	0.998218	4973.03	15.1	10162.9	850.313	6179.71	166.036
2019-05-10	NR1901SF_T4_41	1047.84	20727	17465.5	43393.4	6088.98	6376.82	0.954861	0.157951	0.0156214	0.0163599	0.294687	5.45134	0.833053	0.85772	389.599	5.5184	3.39343	5.45134	0.987847	4979.32	24.3695	9541.4	521.208	6059.48	106.044
2019-05-10	NR1901SF_T4_42	2089.79	39658.8	33284	88187.4	13088	7069.85	1.85125	0.311949	0.0335776	0.0181378	0.188104	4.7128	0.832024	0.563387	609.599	4.74635	5.31621	4.7128	0.99293	4977.57	16.0081	11881.5	492.141	6513.11	91.9386
2019-05-10	NR1901SF_T4_45	3286.97	63064	53269.4	131733	16298.7	8555.1	1.90514	0.480258	0.0418145	0.0219483	0.188031	7.5626	0.834711	0.516152	611.804	7.5802	5.31826	7.5626	0.997679	4982.15	14.663	11883.6	772.52	6516.77	143.109
2019-05-10	NR1901SF_T4_46	3270.98	57670.9	48138.1	120438	46592	17264.6	2.69871	0.438014	0.119533	0.0442926	0.294317	5.71426	0.827451	0.599479	387.465	5.74562	3.39769	5.71426	0.994542	4969.74	17.0396	9547.66	545.462	6053.92	110.18
2019-05-10	NR1901SF_T4_47	1650.96	27580.3	23098.4	60860.7	13146.4	8877.24	1.48091	0.215941	0.0337272	0.0227747	0.339654	3.74174	0.833284	0.74168	338.113	3.81454	2.94417	3.74174	0.980915	4979.72	21.0722	8846.02	350.407	5915.96	74.4394
2019-05-10	NR1901SF_T4_48	730.77	16264.8	13556.9	33529.1	5750.71	5703.54	1.00827	0.122647	0.0147536	0.0146325	0.371947	2.47927	0.832227	0.567971	308.366	2.5435	2.68856	2.47927	0.974749	4977.91	16.1381	8414.09	228.877	5822.74	50.2227
2019-05-10	NR1901SF_T4_49	9532.25	181841	152749	380063	64349.7	31489.6	2.04352	1.38357	0.16509	0.0807872	0.187491	4.06392	0.833617	0.451941	612.763	4.08897	5.3336	4.06392	0.993873	4980.29	12.84	11899.2	426.783	6518.36	79.6914
2019-05-10	NR1901SF_T4_50	2868.11	50633.3	42540.8	105421	21826.6	14942.3	1.46073	0.384481	0.0559966	0.0383347	0.316789	6.09537	0.838894	0.695096	364.958	6.13487	3.15667	6.09537	0.993561	4989.25	19.7404	9184.3	570.773	5993.32	117.211
2019-05-10	NR1901SF_T4_51	1677.69	33970.3	28543.8	71170.9	22177	12588.1	1.76174	0.258815	0.0568954	0.0322951	0.371049	3.72746	0.834349	0.498498	309.901	3.76065	2.69506	3.72746	0.991175	4981.53	14.1619	8425.45	341.319	5827.76	73.4058
2019-05-10	NR1901SF_T4_52	5956.54	108610	90891.8	228299	88526.2	39125	2.26265	0.828225	0.227115	0.100376	0.34304	7.01232	0.829372	0.462435	333.204	7.02755	2.91511	7.01232	0.997833	4973.03	13.1423	8798.34	640.287	5901.15	133.16
2019-05-10	NR1901SF_T4_53	2735.75	48442.9	41315.8	102855	24352.5	12510.2	1.94661	0.372901	0.0624767	0.0320952	0.264895	3.21157	0.831983	0.5409	432.86	3.2568	3.77509	3.21157	0.986112	4977.5	15.3693	10078.4	319.309	6166.14	63.9301
2019-05-10	NR1901SF_T4_54	984.821	17881.6	15079.5	38036.9	2275.78	4854.6	0.468789	0.137453	0.00583855	0.0124546	0.283446	8.46009	0.832211	0.620855	404.641	8.48284	3.52801	8.46009	0.997318	4977.89	17.6408	9735.91	798.32	6097.85	158.758
2019-05-10	NR1901SF_T4_55	2525.89	49776.8	41842.1	104180	31346.6	13652.7	2.296	0.379068	0.0804202	0.0350262	0.293455	2.24125	0.832368	0.518104	390.912	2.30035	3.40768	2.24125	0.974306	4978.16	14.7211	9562.27	219.618	6062.89	45.5581
2019-05-10	NR1901SF_T4_56	758.552	13425.3	10946.9	27253.7	6365.41	5507.8	1.15571	0.099948	0.0163306	0.0141303	0.35295	5.43014	0.817509	0.730373	319.216	5.47904	2.83326	5.43014	0.991075	4952.55	20.776	8662.15	497.741	5857.74	105.269
2019-05-10	NR1901SF_T4_57	1910.86	35758.9	30245.5	75926.8	8970.66	7024.69	1.27702	0.27478	0.0230144	0.018022	0.209931	4.64112	0.833275	0.695464	547.038	4.69293	4.76347	4.64112	0.988958	4979.7	19.7591	11291.2	476.497	6403.36	90.9326
2019-05-10	NR1901SF_T4_58	1207.52	22094.4	18416.5	45836.5	14875.5	12218.4	1.21746	0.167169	0.0381632	0.0313465	0.549056	3.97922	0.825245	0.696579	207.144	4.03973	1.82131	3.97922	0.985021	4965.94	19.8029	6686.22	322.964	5420.35	78.527
2019-05-10	NR1901SF_T4_59	424.368	7593.13	6288.4	15613.1	3548.5	6593.71	0.538164	0.0571017	0.00910374	0.0169163	0.88889	3.83909	0.815649	0.900999	126.462	3.9434	1.125	3.83909	0.973548	4949.31	25.6332	4859.12	256.856	4922.39	76.4976
2019-05-10	NR1901SF_T4_60	386.557	8233.08	6828.68	17178.9	3631.51	3721.64	0.975781	0.062418	0.0093167	0.00954795	0.442178	4.04151	0.827664	1.03879	257.966	4.17287	2.26153	4.04151	0.968519	4970.1	29.526	7620.93	351.542	5642.18	81.0882
2019-05-10	NR1901SF_T4_32	4164.06	76177.1	64039	164721	24255.6	10658	2.27581	0.59036	0.0622283	0.0273433	0.158166	10.1638	0.83259	0.521362	725.477	10.1772	6.32247	10.1638	0.998687	4978.53	14.8134	12834.5	1042.43	6689.55	187.884	large uncertainty
2019-05-10	NR1901SF_T4_43	1956.84	33441.3	28417.8	69855.7	2958.03	2012.59	1.46976	0.255	0.00758887	0.00516333	0.0645989	19.9664	0.842384	0.633574	1797.18	19.9764	15.4801	19.9664	0.999497	4995.14	17.9885	18063.9	2053.34	7609.82	341.145	large uncertainty
2019-05-10	NR1901SF_T4_44	5965.95	92033.9	77232.8	191495	40221.7	25050.1	1.60565	0.698436	0.103189	0.0642664	0.181917	16.3633	0.830941	0.538544	629.512	16.3721	5.49702	16.3633	0.999459	4975.72	15.3035	12063.5	1575.7	6545.7	287.214	large uncertainty
	1 204Pb counts after removing 204Hg interference using measured 202Hg and natural 202Hg/204Hg ratio
	2 concentrations based on WC1 assuming 0.2 ppm Pb, 0.002 ppm Th and 5 ppm U
	bd = below detection
